# Supplementary material for: Detection and validation of structural variations in bovine whole-genome sequence data
Source: Genet Sel Evol. 2017 Jan 25;49:13. doi: 10.1186/s12711-017-0286-5 (PMC5267451; doi:10.1186/s12711-017-0286-5)
Supplement: Supplementary file 2 — Additional file 2: Table S1.Sample animals with sequence coverage and SRA accession number. This file contains for each sample international ID, breed, sequencing coverage and SRA accession number. [file 12711_2017_286_MOESM2_ESM.xlsx]

## Sheet: POP
Animal ID	Breed	SRA	Coverage
HOLAUSF001	Holstein	SRR1262779	44.53
HOLAUSM002	Holstein	SRR1262784	6.84
HOLAUSM003	Holstein		6.65
HOLAUSM004	Holstein	SRR1188706	12.26
HOLAUSM005	Holstein		15.63
HOLAUSM006	Holstein		6.41
HOLAUSM007	Holstein		17.77
HOLAUSM008	Holstein		10.3
HOLAUSM009	Holstein	SRR1262781	11.43
HOLAUSM010	Holstein	SRR1262533	5.39
HOLAUSM011	Holstein	SRR1262536	5.09
HOLAUSM012	Holstein	SRR1262780	14.12
HOLAUSM013	Holstein	SRR1262538	5.38
HOLAUSM014	Holstein	SRR1262539	5.06
HOLAUSM015	Holstein	SRR1262660	5
HOLAUSM016	Holstein	SRR1262661	11.71
HOLAUSM017	Holstein	SRR1262662	5.08
HOLAUSM018	Holstein	SRR1262663	9.13
HOLAUSM019	Holstein	SRR1262664	11.87
HOLAUSM020	Holstein	SRR1262665	5.06
HOLAUSM021	Holstein	SRR1262666	3.21
HOLAUSM022	Holstein	SRR1262667	5.03
HOLAUSM023	Holstein	SRR1262668	10.64
HOLAUSM024	Holstein	SRR1262782	10.47
HOLAUSM025	Holstein	SRR1262669	5.4
HOLAUSM026	Holstein	SRR1262670	5.76
HOLAUSM027	Holstein	SRR1262671	5.48
HOLAUSM028	Holstein	SRR1262672	11.61
HOLAUSM029	Holstein	SRR1262673	6.07
HOLAUSM030	Holstein	SRR1262674	15.37
HOLAUSM031	Holstein	SRR1262675	10.2
HOLAUSM032	Holstein	SRR1262676	5.99
HOLAUSM033	Holstein	SRR1262785	14.06
HOLAUSM034	Holstein	SRR1262677	17.69
HOLAUSM035	Holstein	SRR1262678	10.75
HOLAUSM036	Holstein	SRR1262679	11.33
HOLAUSM037	Holstein	SRR1262680	5.56
HOLAUSM038	Holstein	SRR1262681	12.39
HOLAUSM039	Holstein		14.9
HOLAUSM040	Holstein	SRR1262682	9.45
HOLAUSM041	Holstein	SRR1262783	5.13
HOLAUSM042	Holstein	SRR1262683	6.11
HOLAUSM043	Holstein	SRR1262684	15.01
HOLAUSM044	Holstein	SRR1262685	5.67
HOLAUSM045	Holstein	SRR1262786	14.98
HOLAUSM046	Holstein	SRR1262686	5.07
HOLAUSM047	Holstein	SRR1262687	4.79
HOLAUSM048	Holstein	SRR1262688	4.82
HOLAUSM049	Holstein	SRR1262689	6.49
HOLAUSM050	Holstein	SRR1262787	13.81
HOLAUSM051	Holstein	SRR1262690	4.94
HOLAUSM052	Holstein	SRR1262691	10.1
HOLAUSM053	Holstein	SRR1262692	5.63
HOLAUSM054	Holstein		13.99
HOLAUSM055	Holstein		12.24
HOLAUSM056	Holstein	SRR1262693	5.56
HOLAUSM057	Holstein	SRR1262694	11.78
HOLAUSM058	Holstein	SRR1262695	17.09
HOLAUSM059	Holstein	SRR1262696	19
HOLAUSM060	Holstein	SRR1262697	9.5
HOLAUSM061	Holstein	SRR1262698	27.68
HOLCANM062	Holstein	SRR1262788	9.05
HOLCANM063	Holstein	SRR1262699	12.77
HOLCANM064	Holstein		10.07
HOLCANM065	Holstein		12.12
HOLCANM066	Holstein	SRR1262700	16.76
HOLCANM067	Holstein		14
HOLCANM068	Holstein	SRR1262714	9.22
HOLCANM069	Holstein		13
HOLCANM070	Holstein	SRR1262702	26.15
HOLCANM071	Holstein		9.96
HOLCANM072	Holstein	SRR1262703	17.85
HOLCANM073	Holstein		12.71
HOLCANM074	Holstein		12.51
HOLCANM075	Holstein		12.08
HOLCANM076	Holstein		9.03
HOLCANM077	Holstein		14.63
HOLCANM078	Holstein		14.76
HOLCANM079	Holstein		14.69
HOLCANM080	Holstein		12.81
HOLCANM081	Holstein		11
HOLCANM082	Holstein	SRR1262704	12.91
HOLCANM083	Holstein		11.89
HOLCHEF084	Holstein		13.33
HOLCHEF085	Holstein		10.46
HOLCHEF086	Holstein		16.84
HOLCHEF087	Holstein		10.09
HOLCHEF088	Holstein		11.66
HOLCHEM089	Holstein		10.08
HOLCHEM090	Holstein		11.83
HOLDEUM091	Holstein		9.43
HOLDEUM092	Holstein		11.44
HOLDEUM093	Holstein		10.35
HOLDEUM094	Holstein		10.71
HOLDEUM095	Holstein		11.39
HOLDEUM096	Holstein		12.55
HOLDEUM097	Holstein		12.81
HOLDEUM098	Holstein		15.89
HOLDEUM099	Holstein		11.73
HOLDEUM100	Holstein		11.07
HOLDEUM101	Holstein		12.35
HOLDEUM102	Holstein	SRR1262717	9.22
HOLDEUM103	Holstein		12.17
HOLDEUM104	Holstein		10.97
HOLDEUM105	Holstein		11.22
HOLDEUM106	Holstein		11.84
HOLDEUM107	Holstein		10.71
HOLDEUM108	Holstein		11.96
HOLDEUM109	Holstein		11.47
HOLDEUM110	Holstein		10.84
HOLDEUM111	Holstein		10.58
HOLDEUM112	Holstein		12.62
HOLDEUM113	Holstein		9.86
HOLDEUM114	Holstein		5.6
HOLDEUM115	Holstein		10.59
HOLDNKM116	Holstein	SRR1262720	8.72
HOLDNKM117	Holstein	SRR1262721	8.35
HOLDNKM118	Holstein	SRR1262722	8.93
HOLDNKM119	Holstein	SRR1262726	9.85
HOLDNKM120	Holstein	SRR1262727	8.76
HOLDNKM121	Holstein	SRR1262729	8.2
HOLFINM122	Holstein	SRR1262730	9.84
HOLFRAM123	Holstein		8
HOLFRAM124	Holstein		8
HOLFRAM125	Holstein		12
HOLFRAM126	Holstein		12
HOLFRAM127	Holstein		13
HOLFRAM128	Holstein	SRR1262758	18.91
HOLFRAM129	Holstein		11
HOLFRAM130	Holstein		12
HOLFRAM131	Holstein	SRR1262760	12.09
HOLFRAM132	Holstein	SRR1262761	22.47
HOLFRAM133	Holstein		10
HOLFRAM134	Holstein		11
HOLFRAM135	Holstein		11.47
HOLFRAM136	Holstein		11
HOLFRAM137	Holstein		7.83
HOLFRAM138	Holstein		9.75
HOLFRAM139	Holstein		12
HOLFRAM140	Holstein		11
HOLFRAM141	Holstein		12
HOLFRAM142	Holstein		12
HOLFRAM143	Holstein		12.666
HOLFRAM144	Holstein	SRR1262763	11.59
HOLFRAM145	Holstein	SRR1262764	20.44
HOLFRAM146	Holstein		10.7633
HOLFRAM147	Holstein		11
HOLFRAM148	Holstein		11
HOLFRAM149	Holstein		11.3165
HOLFRAM150	Holstein		10
HOLFRAM151	Holstein		10
HOLFRAM152	Holstein		11
HOLFRAM153	Holstein		11
HOLFRAM154	Holstein		12
HOLFRAM155	Holstein		12
HOLFRAM156	Holstein	SRR1262766	12.01
HOLFRAM157	Holstein		14.37
HOLFRAM158	Holstein		12
HOLFRAM159	Holstein		7.03
HOLFRAM160	Holstein		11.8
HOLFRAM161	Holstein		11.37
HOLGBRM162	Holstein	SRR1262708	4.51
HOLGBRM163	Holstein		7.37
HOLGBRM164	Holstein		7.86
HOLGBRM165	Holstein		7.34
HOLGBRM166	Holstein		8.27
HOLGBRM167	Holstein		7.63
HOLGBRM168	Holstein		7.2
HOLGBRM169	Holstein		10.48
HOLGBRM170	Holstein		9.15
HOLITAF171	Holstein		14.54
HOLITAM172	Holstein		12.32
HOLITAM173	Holstein		14.93
HOLNLDM174	Holstein		8.03
HOLNLDM175	Holstein		8.88
HOLNLDM176	Holstein		10.67
HOLNLDM177	Holstein	SRR1262769	7.87
HOLNLDM178	Holstein	SRR1262746	8.93
HOLNLDM179	Holstein	SRR1262770	7.39
HOLNLDM180	Holstein	SRR1262747	9.21
HOLNLDM181	Holstein	SRR1262771	8.13
HOLNLDM182	Holstein		12
HOLNLDM183	Holstein		7.54
HOLNLDM184	Holstein		13
HOLNLDM185	Holstein		5.96
HOLNLDM186	Holstein		10.82
HOLNLDM187	Holstein		11.02
HOLNLDM188	Holstein		12.41
HOLNLDM189	Holstein		10.59
HOLNLDM190	Holstein		11.14
HOLNLDM191	Holstein		10.19
HOLNLDM192	Holstein		10.75
HOLNLDM193	Holstein		11.09
HOLNLDM194	Holstein		10.88
HOLNLDM195	Holstein		10.74
HOLNLDM196	Holstein		11.13
HOLNLDM197	Holstein		9.45
HOLNLDM198	Holstein	SRR1262748	9.09
HOLNLDM199	Holstein		10.94
HOLNLDM200	Holstein		10.01
HOLNLDM201	Holstein		11.14
HOLNLDM202	Holstein	SRR1262772	3.21
HOLNLDM203	Holstein	SRR1262768	19.29
HOLNLDM204	Holstein	SRR1262773	6.31
HOLNLDM205	Holstein		9.25
HOLNLDM206	Holstein		7.74
HOLNLDM207	Holstein		9.33
HOLNLDM208	Holstein	SRR1262749	9.22
HOLNLDM209	Holstein	SRR1262750	8.73
HOLNLDM210	Holstein	SRR1262751	8.93
HOLNLDM211	Holstein		10.12
HOLNLDM212	Holstein	SRR1262752	9.04
HOLNLDM213	Holstein		5.14
HOLNLDM214	Holstein		7.71
HOLNLDM215	Holstein	SRR1262774	7.52
HOLNLDM216	Holstein	SRR1262775	6.89
HOLNLDM217	Holstein		7.78
HOLNLDM218	Holstein		9.5
HOLNLDM219	Holstein		8.34
HOLNLDM220	Holstein		10.57
HOLNLDM221	Holstein	SRR1262710	18.5
HOLNLDM222	Holstein		9.18
HOLNLDM223	Holstein		7.23
HOLNLDM224	Holstein	SRR1262777	7.96
HOLNZLM225	Holstein		9.3
HOLNZLM226	Holstein		7.08
HOLSWEM227	Holstein	SRR1262737	9.92
HOLUSAM228	Holstein	SRR1262738	9.88
HOLUSAM229	Holstein		8.49
HOLUSAM230	Holstein	SRR1262739	7.94
HOLUSAM231	Holstein		7.39
HOLUSAM232	Holstein		14.46
HOLUSAM233	Holstein	SRR1262711	15.19
HOLUSAM234	Holstein		8.17
HOLUSAM235	Holstein	SRR1262712	18.88
HOLUSAM236	Holstein	SRR1262743	9.73
HOLUSAM237	Holstein		14.45
HOLUSAM238	Holstein		13
HOLUSAM239	Holstein		10.89
HOLUSAM240	Holstein		13
HOLUSAM241	Holstein		12
HOLUSAM242	Holstein		6.24
HOLUSAM243	Holstein		11
HOLUSAM244	Holstein		10.03
HOLUSAM245	Holstein		8.2
HOLUSAM246	Holstein		14.55
HOLUSAM247	Holstein		6.58
HOLUSAM248	Holstein		15.5
HOLUSAM249	Holstein	SRR1262713	14.74
HOLUSAM250	Holstein		15.33
HOLUSAM251	Holstein		16.92
HOLUSAM252	Holstein		15.7
JERAUSM001	Jersey		13.5547
JERAUSM002	Jersey		11.03
JERAUSM003	Jersey	SRR1262789	7.35
JERAUSM004	Jersey	SRR1262790	6.96
JERAUSM005	Jersey	SRR1262791	7.8
JERAUSM006	Jersey		14.93
JERAUSM007	Jersey	SRR1262792	5.44
JERAUSM008	Jersey		6.34
JERAUSM009	Jersey	SRR1262793	11.2
JERAUSM010	Jersey		12.5482
JERAUSM011	Jersey		14.1297
JERAUSM012	Jersey		9.7876
JERAUSM013	Jersey		11.0284
JERAUSM014	Jersey		13.2751
JERAUSM015	Jersey	SRR1262794	5.09
JERAUSM016	Jersey		15.21
JERAUSM017	Jersey		11.5282
JERAUSM018	Jersey	SRR1262795	5.86
JERAUSM019	Jersey		11.6812
JERAUSM020	Jersey		8.81
JERAUSM021	Jersey	SRR1262796	4.99
JERAUSM022	Jersey		10.8974
JERAUSM023	Jersey		12.46
JERAUSM024	Jersey		10.43
JERAUSM025	Jersey		10.29
JERAUSM026	Jersey		13.2815
JERAUSM027	Jersey		10.86
JERAUSM028	Jersey		8.29
JERAUSM029	Jersey		11.47
JERCANM030	Jersey		25.68
JERCANM031	Jersey		11.05
JERCANM032	Jersey		11.76
JERDNKM033	Jersey		11.25
JERNZLM034	Jersey		13.61
JERNZLM035	Jersey		14.08
JERNZLM036	Jersey		12.33
JERUSAM037	Jersey		15.52
JERUSAM038	Jersey	SRR1262797	8.8
JERUSAM039	Jersey		12.6
JERUSAM040	Jersey		10.39
JERUSAM041	Jersey		16.01
JERUSAM042	Jersey	SRR1262798	10.83
JERUSAM043	Jersey		14.91
JERUSAM044	Jersey	SRR1262799	10.07
JERUSAM045	Jersey	SRR1262800	5.71
JERUSAM046	Jersey	SRR1262801	11.43
JERUSAM047	Jersey		15.68
JERUSAM048	Jersey	SRR1262802	9.93
JERUSAM049	Jersey		10.93
JERUSAM050	Jersey		11.75
JERUSAM051	Jersey		7.39
JERUSAM052	Jersey		11.09
JERUSAM053	Jersey		9.41
JERUSAM054	Jersey		10.61
JERUSAM055	Jersey		11.79
JERUSAM056	Jersey		3.45
JERUSAM057	Jersey		8.81
JERUSAM058	Jersey		6.05
JERUSAM059	Jersey	SRR1262803	10.64
JERUSAM060	Jersey		14.49
JERUSAM061	Jersey		12.8
JERUSAM062	Jersey		10.79
JERUSAM063	Jersey		10.25
JERUSAM064	Jersey		10.71

## Sheet: Twice-Seq Holsteins
Animal_ID	SRA1	COV_SEQ_1	SRA2	COV_SEQ_2
HOLCANM253	SRR1262701	12.66		30.05
HOLCANM254		11.18		22.65
HOLDEUM255	SRR1262715	9.17		7.85
HOLDEUM256	SRR1262716	8.59		8.89
HOLDEUM257	SRR1262718	10.92		10.61
HOLDEUM258	SRR1262719	12		12.37
HOLDNKM259	SRR1262723	8.28		7.46
HOLDNKM260	SRR1262724	5.34		11.59
HOLDNKM261	SRR1262725	7.27		8.57
HOLDNKM262	SRR1262728	8.77		8.63
HOLDNKM263	SRR1262705	8.74		8.28
HOLFRAM264	SRR1262757	9.71		12
HOLFRAM265	SRR1262731	16.9		20.14
HOLFRAM266	SRR1262706	6.1		8.15
HOLFRAM267	SRR1262759	17.02		21.02
HOLFRAM268	SRR1262707	15.08	SRR1262767	6.24
HOLGBRM269	SRR1262732	8.36		13.05
HOLNLDM270	SRR1262709	7.06		8.45
HOLNLDM271	SRR1262776	16.75		7.85
HOLNLDM272	SRR1262733	9.14		7.77
HOLNLDM273	SRR1262734	8.4		6.94
HOLNLDM274	SRR1262735	7.28		7.5
HOLSWEM275	SRR1262736	9.23		9.63
HOLUSAM276	SRR1262740	10.34		6.55
HOLUSAM277	SRR1262741	9.55		8.07
HOLUSAM278	SRR1262742	9.48		9.48
HOLUSAM279	SRR1262744	7.99		8.76
HOLUSAM280	SRR1262745	9.28		8.27

## Sheet: Sire_son
Sire	Son	Breed
HOLAUSF001	HOLFRAM130	Holstein
HOLAUSM005	HOLCANM063	Holstein
HOLAUSM006	HOLCANM063	Holstein
HOLAUSM008	HOLCANM063	Holstein
HOLAUSM009	HOLCANM066	Holstein
HOLAUSM017	HOLCANM068	Holstein
HOLAUSM018	HOLCANM068	Holstein
HOLAUSM019	HOLUSAM232	Holstein
HOLAUSM020	HOLUSAM232	Holstein
HOLAUSM021	HOLUSAM232	Holstein
HOLAUSM022	HOLUSAM232	Holstein
HOLAUSM027	HOLUSAM235	Holstein
HOLAUSM030	HOLUSAM235	Holstein
HOLAUSM034	HOLUSAM236	Holstein
HOLAUSM038	HOLUSAM235	Holstein
HOLAUSM039	HOLCANM072	Holstein
HOLAUSM040	HOLCANM072	Holstein
HOLAUSM041	HOLNLDM215	Holstein
HOLAUSM043	HOLAUSM019	Holstein
HOLAUSM044	HOLUSAM236	Holstein
HOLAUSM045	HOLUSAM236	Holstein
HOLAUSM046	HOLAUSM019	Holstein
HOLAUSM047	HOLNLDM204	Holstein
HOLAUSM050	HOLNLDM218	Holstein
HOLAUSM051	HOLNLDM219	Holstein
HOLAUSM052	HOLNLDM204	Holstein
HOLAUSM056	HOLAUSM030	Holstein
HOLAUSM057	HOLAUSM030	Holstein
HOLAUSM058	HOLAUSM030	Holstein
HOLAUSM061	HOLAUSM054	Holstein
HOLCANM066	HOLCANM063	Holstein
HOLCANM070	HOLCANM064	Holstein
HOLCANM071	HOLCANM066	Holstein
HOLCHEM090	HOLUSAM232	Holstein
HOLDEUM091	HOLUSAM232	Holstein
HOLDEUM093	HOLNLDM203	Holstein
HOLDEUM095	HOLFRAM157	Holstein
HOLDEUM096	HOLNLDM178	Holstein
HOLDEUM101	HOLITAM172	Holstein
HOLDEUM101	HOLFRAM159	Holstein
HOLDEUM109	HOLUSAM232	Holstein
HOLDEUM111	HOLCANM066	Holstein
HOLDEUM112	HOLCANM066	Holstein
HOLDEUM113	HOLUSAM232	Holstein
HOLDNKM116	HOLUSAM232	Holstein
HOLDNKM118	HOLNLDM218	Holstein
HOLDNKM118	HOLNLDM218	Holstein
HOLDNKM119	HOLFRAM157	Holstein
HOLDNKM121	HOLDEUM099	Holstein
HOLFRAM123	HOLNLDM204	Holstein
HOLFRAM124	HOLFRAM157	Holstein
HOLFRAM125	HOLUSAM249	Holstein
HOLFRAM126	HOLGBRM170	Holstein
HOLFRAM126	HOLFRAM157	Holstein
HOLFRAM128	HOLNLDM216	Holstein
HOLFRAM130	HOLNLDM224	Holstein
HOLFRAM130	HOLCANM069	Holstein
HOLFRAM130	HOLUSAM232	Holstein
HOLFRAM131	HOLUSAM236	Holstein
HOLFRAM134	HOLUSAM243	Holstein
HOLFRAM136	HOLUSAM235	Holstein
HOLFRAM139	HOLGBRM170	Holstein
HOLFRAM140	HOLCANM082	Holstein
HOLFRAM141	HOLFRAM157	Holstein
HOLFRAM142	HOLFRAM157	Holstein
HOLFRAM144	HOLCANM066	Holstein
HOLFRAM146	HOLNLDM204	Holstein
HOLFRAM147	HOLUSAM235	Holstein
HOLFRAM148	HOLUSAM236	Holstein
HOLFRAM150	HOLFRAM130	Holstein
HOLFRAM151	HOLUSAM235	Holstein
HOLFRAM152	HOLFRAM157	Holstein
HOLFRAM153	HOLUSAM249	Holstein
HOLFRAM154	HOLUSAM235	Holstein
HOLFRAM155	HOLUSAM235	Holstein
HOLFRAM157	HOLUSAM230	Holstein
HOLFRAM157	HOLFRAM144	Holstein
HOLFRAM158	HOLNLDM203	Holstein
HOLFRAM159	HOLUSAM235	Holstein
HOLFRAM160	HOLFRAM130	Holstein
HOLGBRM169	HOLUSAM232	Holstein
HOLGBRM170	HOLUSAM232	Holstein
HOLGBRM170	HOLITAM172	Holstein
HOLNLDM176	HOLNLDM215	Holstein
HOLNLDM177	HOLUSAM235	Holstein
HOLNLDM178	HOLNLDM215	Holstein
HOLNLDM179	HOLFRAM138	Holstein
HOLNLDM180	HOLNLDM216	Holstein
HOLNLDM181	HOLNLDM215	Holstein
HOLNLDM185	HOLNLDM220	Holstein
HOLNLDM186	HOLNLDM224	Holstein
HOLNLDM189	HOLNLDM224	Holstein
HOLNLDM191	HOLNLDM224	Holstein
HOLNLDM194	HOLNLDM224	Holstein
HOLNLDM195	HOLNLDM224	Holstein
HOLNLDM199	HOLNLDM224	Holstein
HOLNLDM208	HOLFRAM157	Holstein
HOLNLDM209	HOLNLDM180	Holstein
HOLNLDM212	HOLUSAM249	Holstein
HOLNLDM218	HOLNLDM202	Holstein
HOLNLDM219	HOLNLDM216	Holstein
HOLNLDM219	HOLUSAM232	Holstein
HOLNLDM220	HOLUSAM234	Holstein
HOLNLDM224	HOLUSAM235	Holstein
HOLNZLM226	HOLNLDM224	Holstein
HOLSWEM227	HOLNLDM185	Holstein
HOLUSAM240	HOLUSAM236	Holstein
HOLUSAM243	HOLUSAM236	Holstein
HOLUSAM251	HOLUSAM242	Holstein
HOLUSAM252	HOLUSAM252	Jersey
HOLUSAM252	HOLUSAM252	Jersey
HOLUSAM252	HOLUSAM252	Jersey
HOLUSAM252	JERCANM034	Jersey
HOLUSAM252	JERCANM034	Jersey
HOLUSAM252	JERCANM034	Jersey
HOLUSAM252	JERCANM034	Jersey
HOLUSAM252	HOLUSAM252	Jersey
HOLUSAM252	HOLUSAM252	Jersey
HOLUSAM252	HOLUSAM252	Jersey
HOLUSAM252	HOLUSAM252	Jersey
HOLUSAM252	HOLUSAM252	Jersey
HOLUSAM252	HOLUSAM252	Jersey
HOLUSAM252	HOLUSAM252	Jersey
HOLUSAM252	HOLUSAM252	Jersey
HOLUSAM252	JERCANM034	Jersey
HOLUSAM252	JERCANM034	Jersey
HOLUSAM252	HOLUSAM252	Jersey
HOLUSAM252	HOLUSAM252	Jersey
HOLUSAM252	HOLUSAM252	Jersey
HOLUSAM252	HOLUSAM252	Jersey
HOLUSAM252	JERCANM034	Jersey
JERCANM034	HOLUSAM252	Jersey
JERCANM034	HOLUSAM252	Jersey
JERCANM034	JERCANM034	Jersey
JERCANM034	JERCANM034	Jersey
JERUSAM035	JERCANM034	Jersey
JERCANM058	JERCANM034	Jersey
JERCANM058	JERCANM034	Jersey
JERCANM058	JERCANM034	Jersey
JERCANM058	JERUSAM051	Jersey
JERAUSM064	JERCANM034	Jersey
JERAUSM064	JERCANM058	Jersey
