# Supplementary material for: Detection and validation of structural variations in bovine whole-genome sequence data
Source: Genet Sel Evol. 2017 Jan 25;49:13. doi: 10.1186/s12711-017-0286-5 (PMC5267451; doi:10.1186/s12711-017-0286-5)
Supplement: Supplementary file 4 — Additional file 4: Table S6. Results for the validated SV sets. This file contains results of three validated SV sets. [file 12711_2017_286_MOESM4_ESM.xlsx]

## Sheet: Table S6
Chromosome	Start	End	Type	Source
Chr1	389429	389462	Deletion	Twice sequenced individuals
Chr1	449303	449622	Deletion	Twice sequenced individuals
Chr1	582980	583005	Deletion	Twice sequenced individuals
Chr1	630742	630781	Deletion	Twice sequenced individuals
Chr1	800815	800845	Deletion	Twice sequenced individuals
Chr1	1007480	1007526	Deletion	Twice sequenced individuals
Chr1	1668090	1668126	Deletion	Twice sequenced individuals
Chr1	1870379	1870406	Deletion	Twice sequenced individuals
Chr1	1902304	1903587	Deletion	Twice sequenced individuals
Chr1	2010574	2010665	Deletion	Twice sequenced individuals
Chr1	2278748	2278774	Deletion	Twice sequenced individuals
Chr1	2416086	2416162	Deletion	Twice sequenced individuals
Chr1	2735581	2735821	Deletion	Twice sequenced individuals
Chr1	2940875	2940911	Deletion	Twice sequenced individuals
Chr1	3015118	3015385	Deletion	Twice sequenced individuals
Chr1	3195908	3195937	Deletion	Twice sequenced individuals
Chr1	4024809	4024907	Deletion	Twice sequenced individuals
Chr1	4201594	4201630	Deletion	Twice sequenced individuals
Chr1	4340824	4340859	Deletion	Twice sequenced individuals
Chr1	4499627	4499732	Deletion	Twice sequenced individuals
Chr1	4551675	4551730	Deletion	Twice sequenced individuals
Chr1	4589083	4589400	Deletion	Twice sequenced individuals
Chr1	4772143	4772179	Deletion	Twice sequenced individuals
Chr1	4932776	4932811	Deletion	Twice sequenced individuals
Chr1	5142314	5143146	Deletion	Twice sequenced individuals
Chr1	5336590	5337052	Deletion	Twice sequenced individuals
Chr1	5889690	5889777	Deletion	Twice sequenced individuals
Chr1	6002484	6002515	Deletion	Twice sequenced individuals
Chr1	6099318	6104583	Deletion	Twice sequenced individuals
Chr1	6326897	6327088	Deletion	Twice sequenced individuals
Chr1	6408415	6408445	Deletion	Twice sequenced individuals
Chr1	6609104	6609734	Deletion	Twice sequenced individuals
Chr1	6733865	6734827	Deletion	Twice sequenced individuals
Chr1	6737224	6737491	Deletion	Twice sequenced individuals
Chr1	6844886	6844978	Deletion	Twice sequenced individuals
Chr1	7277956	7278024	Deletion	Twice sequenced individuals
Chr1	7423566	7423600	Deletion	Twice sequenced individuals
Chr1	8032774	8033016	Deletion	Twice sequenced individuals
Chr1	8158660	8158712	Deletion	Twice sequenced individuals
Chr1	8328008	8328406	Deletion	Twice sequenced individuals
Chr1	8478888	8479163	Deletion	Twice sequenced individuals
Chr1	8504930	8506070	Deletion	Twice sequenced individuals
Chr1	8920950	8920978	Deletion	Twice sequenced individuals
Chr1	9103200	9103367	Deletion	Twice sequenced individuals
Chr1	9235444	9235709	Deletion	Twice sequenced individuals
Chr1	9589497	9589526	Deletion	Twice sequenced individuals
Chr1	9610902	9610931	Deletion	Twice sequenced individuals
Chr1	9870961	9871042	Deletion	Twice sequenced individuals
Chr1	10006918	10007067	Deletion	Twice sequenced individuals
Chr1	10467842	10467867	Deletion	Twice sequenced individuals
Chr1	10546053	10548922	Deletion	Twice sequenced individuals
Chr1	10842445	10843420	Deletion	Twice sequenced individuals
Chr1	11100129	11100351	Deletion	Twice sequenced individuals
Chr1	11145798	11145903	Deletion	Twice sequenced individuals
Chr1	12074487	12074578	Deletion	Twice sequenced individuals
Chr1	12105404	12105650	Deletion	Twice sequenced individuals
Chr1	12246912	12247196	Deletion	Twice sequenced individuals
Chr1	12493226	12493417	Deletion	Twice sequenced individuals
Chr1	12629639	12629726	Deletion	Twice sequenced individuals
Chr1	12677664	12677692	Deletion	Twice sequenced individuals
Chr1	12909438	12909700	Deletion	Twice sequenced individuals
Chr1	13149494	13150016	Deletion	Twice sequenced individuals
Chr1	13446644	13446685	Deletion	Twice sequenced individuals
Chr1	13606929	13607599	Deletion	Twice sequenced individuals
Chr1	13619682	13619988	Deletion	Twice sequenced individuals
Chr1	13779095	13779415	Deletion	Twice sequenced individuals
Chr1	13831145	13832138	Deletion	Twice sequenced individuals
Chr1	14028147	14028216	Deletion	Twice sequenced individuals
Chr1	14086703	14087050	Deletion	Twice sequenced individuals
Chr1	14140823	14140888	Deletion	Twice sequenced individuals
Chr1	14146990	14147365	Deletion	Twice sequenced individuals
Chr1	14231897	14231999	Deletion	Twice sequenced individuals
Chr1	14323938	14325141	Deletion	Twice sequenced individuals
Chr1	14405975	14406296	Deletion	Twice sequenced individuals
Chr1	14406714	14406832	Deletion	Twice sequenced individuals
Chr1	14632289	14632314	Deletion	Twice sequenced individuals
Chr1	14974997	14975597	Deletion	Twice sequenced individuals
Chr1	15385823	15385942	Deletion	Twice sequenced individuals
Chr1	15555777	15555969	Deletion	Twice sequenced individuals
Chr1	15640688	15640757	Deletion	Twice sequenced individuals
Chr1	15859673	15859823	Deletion	Twice sequenced individuals
Chr1	16412117	16412300	Deletion	Twice sequenced individuals
Chr1	16548227	16548263	Deletion	Twice sequenced individuals
Chr1	16679033	16679073	Deletion	Twice sequenced individuals
Chr1	16945552	16946115	Deletion	Twice sequenced individuals
Chr1	16964640	16964722	Deletion	Twice sequenced individuals
Chr1	17321809	17321849	Deletion	Twice sequenced individuals
Chr1	17391582	17391657	Deletion	Twice sequenced individuals
Chr1	17430731	17431959	Deletion	Twice sequenced individuals
Chr1	17775416	17775897	Deletion	Twice sequenced individuals
Chr1	17965589	17966133	Deletion	Twice sequenced individuals
Chr1	18003829	18003914	Deletion	Twice sequenced individuals
Chr1	18245034	18245068	Deletion	Twice sequenced individuals
Chr1	18254665	18254759	Deletion	Twice sequenced individuals
Chr1	18431258	18431286	Deletion	Twice sequenced individuals
Chr1	19396555	19396726	Deletion	Twice sequenced individuals
Chr1	19717359	19717537	Deletion	Twice sequenced individuals
Chr1	19869216	19869402	Deletion	Twice sequenced individuals
Chr1	20152538	20154463	Deletion	Twice sequenced individuals
Chr1	20707641	20708138	Deletion	Twice sequenced individuals
Chr1	20855606	20856903	Deletion	Twice sequenced individuals
Chr1	21177738	21177769	Deletion	Twice sequenced individuals
Chr1	21918009	21918051	Deletion	Twice sequenced individuals
Chr1	22028459	22028511	Deletion	Twice sequenced individuals
Chr1	22038605	22038657	Deletion	Twice sequenced individuals
Chr1	22124196	22124283	Deletion	Twice sequenced individuals
Chr1	22157066	22157098	Deletion	Twice sequenced individuals
Chr1	22397379	22397705	Deletion	Twice sequenced individuals
Chr1	22677092	22677144	Deletion	Twice sequenced individuals
Chr1	22946559	22946584	Deletion	Twice sequenced individuals
Chr1	23028015	23028106	Deletion	Twice sequenced individuals
Chr1	23068970	23069496	Deletion	Twice sequenced individuals
Chr1	23265669	23265703	Deletion	Twice sequenced individuals
Chr1	23676155	23676428	Deletion	Twice sequenced individuals
Chr1	24010238	24010621	Deletion	Twice sequenced individuals
Chr1	24078089	24078317	Deletion	Twice sequenced individuals
Chr1	24196952	24197051	Deletion	Twice sequenced individuals
Chr1	24386678	24386734	Deletion	Twice sequenced individuals
Chr1	25084954	25085015	Deletion	Twice sequenced individuals
Chr1	25341542	25341584	Deletion	Twice sequenced individuals
Chr1	25798336	25798364	Deletion	Twice sequenced individuals
Chr1	25855113	25856959	Deletion	Twice sequenced individuals
Chr1	26008405	26008459	Deletion	Twice sequenced individuals
Chr1	26279214	26279329	Deletion	Twice sequenced individuals
Chr1	26322704	26322754	Deletion	Twice sequenced individuals
Chr1	26453284	26453390	Deletion	Twice sequenced individuals
Chr1	26488435	26488919	Deletion	Twice sequenced individuals
Chr1	26535954	26535985	Deletion	Twice sequenced individuals
Chr1	27294384	27295688	Deletion	Twice sequenced individuals
Chr1	27498916	27499192	Deletion	Twice sequenced individuals
Chr1	27530717	27530945	Deletion	Twice sequenced individuals
Chr1	27559560	27560239	Deletion	Twice sequenced individuals
Chr1	27822202	27822243	Deletion	Twice sequenced individuals
Chr1	28304028	28304522	Deletion	Twice sequenced individuals
Chr1	28368526	28368570	Deletion	Twice sequenced individuals
Chr1	28814829	28815076	Deletion	Twice sequenced individuals
Chr1	29001564	29003324	Deletion	Twice sequenced individuals
Chr1	29266312	29266464	Deletion	Twice sequenced individuals
Chr1	29313934	29315065	Deletion	Twice sequenced individuals
Chr1	29426747	29426960	Deletion	Twice sequenced individuals
Chr1	29505443	29506139	Deletion	Twice sequenced individuals
Chr1	29716894	29716932	Deletion	Twice sequenced individuals
Chr1	29948377	29949203	Deletion	Twice sequenced individuals
Chr1	30178812	30178868	Deletion	Twice sequenced individuals
Chr1	30206449	30206512	Deletion	Twice sequenced individuals
Chr1	30564952	30565011	Deletion	Twice sequenced individuals
Chr1	30648879	30649013	Deletion	Twice sequenced individuals
Chr1	31131007	31131044	Deletion	Twice sequenced individuals
Chr1	31324477	31324897	Deletion	Twice sequenced individuals
Chr1	31411260	31411296	Deletion	Twice sequenced individuals
Chr1	31485724	31486448	Deletion	Twice sequenced individuals
Chr1	31669084	31670082	Deletion	Twice sequenced individuals
Chr1	31704442	31704480	Deletion	Twice sequenced individuals
Chr1	31705222	31705270	Deletion	Twice sequenced individuals
Chr1	31709844	31709879	Deletion	Twice sequenced individuals
Chr1	31725507	31725636	Deletion	Twice sequenced individuals
Chr1	31768180	31768232	Deletion	Twice sequenced individuals
Chr1	31812618	31813390	Deletion	Twice sequenced individuals
Chr1	31981923	31981978	Deletion	Twice sequenced individuals
Chr1	32014505	32014549	Deletion	Twice sequenced individuals
Chr1	32655275	32655608	Deletion	Twice sequenced individuals
Chr1	32753408	32753559	Deletion	Twice sequenced individuals
Chr1	32994765	32994989	Deletion	Twice sequenced individuals
Chr1	33174835	33174944	Deletion	Twice sequenced individuals
Chr1	33335509	33335544	Deletion	Twice sequenced individuals
Chr1	33707819	33709855	Deletion	Twice sequenced individuals
Chr1	33723153	33724983	Deletion	Twice sequenced individuals
Chr1	33755840	33756614	Deletion	Twice sequenced individuals
Chr1	33828547	33828575	Deletion	Twice sequenced individuals
Chr1	33968778	33968809	Deletion	Twice sequenced individuals
Chr1	33991977	33992390	Deletion	Twice sequenced individuals
Chr1	34029658	34029709	Deletion	Twice sequenced individuals
Chr1	34534441	34534838	Deletion	Twice sequenced individuals
Chr1	34611728	34617942	Deletion	Twice sequenced individuals
Chr1	34948515	34948629	Deletion	Twice sequenced individuals
Chr1	35205780	35206007	Deletion	Twice sequenced individuals
Chr1	35211371	35211404	Deletion	Twice sequenced individuals
Chr1	35362951	35366164	Deletion	Twice sequenced individuals
Chr1	35453844	35454179	Deletion	Twice sequenced individuals
Chr1	35568055	35568091	Deletion	Twice sequenced individuals
Chr1	35711181	35716196	Deletion	Twice sequenced individuals
Chr1	35863570	35864218	Deletion	Twice sequenced individuals
Chr1	36019754	36019844	Deletion	Twice sequenced individuals
Chr1	36314041	36314103	Deletion	Twice sequenced individuals
Chr1	36406819	36410313	Deletion	Twice sequenced individuals
Chr1	36492357	36493068	Deletion	Twice sequenced individuals
Chr1	36493893	36495355	Deletion	Twice sequenced individuals
Chr1	36520395	36520449	Deletion	Twice sequenced individuals
Chr1	36884562	36885101	Deletion	Twice sequenced individuals
Chr1	36928037	36929364	Deletion	Twice sequenced individuals
Chr1	37049902	37051109	Deletion	Twice sequenced individuals
Chr1	37146558	37146589	Deletion	Twice sequenced individuals
Chr1	37275264	37275305	Deletion	Twice sequenced individuals
Chr1	37341090	37341155	Deletion	Twice sequenced individuals
Chr1	37552598	37552624	Deletion	Twice sequenced individuals
Chr1	37695985	37696224	Deletion	Twice sequenced individuals
Chr1	38080416	38080450	Deletion	Twice sequenced individuals
Chr1	38180888	38180935	Deletion	Twice sequenced individuals
Chr1	38274240	38274999	Deletion	Twice sequenced individuals
Chr1	38276443	38276848	Deletion	Twice sequenced individuals
Chr1	38408562	38408590	Deletion	Twice sequenced individuals
Chr1	38480376	38480494	Deletion	Twice sequenced individuals
Chr1	38480830	38481960	Deletion	Twice sequenced individuals
Chr1	38878660	38878716	Deletion	Twice sequenced individuals
Chr1	39153954	39154705	Deletion	Twice sequenced individuals
Chr1	39202005	39202049	Deletion	Twice sequenced individuals
Chr1	39541394	39541433	Deletion	Twice sequenced individuals
Chr1	39687843	39687887	Deletion	Twice sequenced individuals
Chr1	39702233	39702327	Deletion	Twice sequenced individuals
Chr1	39858930	39858980	Deletion	Twice sequenced individuals
Chr1	39868325	39869992	Deletion	Twice sequenced individuals
Chr1	39986426	39986665	Deletion	Twice sequenced individuals
Chr1	40270960	40271713	Deletion	Twice sequenced individuals
Chr1	40315451	40315499	Deletion	Twice sequenced individuals
Chr1	40885487	40885513	Deletion	Twice sequenced individuals
Chr1	40895396	40895509	Deletion	Twice sequenced individuals
Chr1	40914275	40914575	Deletion	Twice sequenced individuals
Chr1	40962871	40973398	Deletion	Twice sequenced individuals
Chr1	41073784	41073928	Deletion	Twice sequenced individuals
Chr1	41246508	41247717	Deletion	Twice sequenced individuals
Chr1	41805635	41805811	Deletion	Twice sequenced individuals
Chr1	41836341	41836796	Deletion	Twice sequenced individuals
Chr1	42309206	42309233	Deletion	Twice sequenced individuals
Chr1	42850312	42851025	Deletion	Twice sequenced individuals
Chr1	43379131	43379167	Deletion	Twice sequenced individuals
Chr1	43430487	43430516	Deletion	Twice sequenced individuals
Chr1	43669450	43669628	Deletion	Twice sequenced individuals
Chr1	44499625	44499660	Deletion	Twice sequenced individuals
Chr1	44650598	44650663	Deletion	Twice sequenced individuals
Chr1	44821535	44821578	Deletion	Twice sequenced individuals
Chr1	44888571	44888609	Deletion	Twice sequenced individuals
Chr1	45591441	45591490	Deletion	Twice sequenced individuals
Chr1	45684923	45684955	Deletion	Twice sequenced individuals
Chr1	45883327	45883377	Deletion	Twice sequenced individuals
Chr1	46284415	46284623	Deletion	Twice sequenced individuals
Chr1	46387217	46387441	Deletion	Twice sequenced individuals
Chr1	46772342	46772377	Deletion	Twice sequenced individuals
Chr1	47069515	47070351	Deletion	Twice sequenced individuals
Chr1	47078535	47078561	Deletion	Twice sequenced individuals
Chr1	47195132	47195689	Deletion	Twice sequenced individuals
Chr1	47211598	47213281	Deletion	Twice sequenced individuals
Chr1	47341098	47341158	Deletion	Twice sequenced individuals
Chr1	47685400	47685574	Deletion	Twice sequenced individuals
Chr1	48017837	48018932	Deletion	Twice sequenced individuals
Chr1	48025743	48026436	Deletion	Twice sequenced individuals
Chr1	48046367	48046519	Deletion	Twice sequenced individuals
Chr1	48079943	48082129	Deletion	Twice sequenced individuals
Chr1	48131184	48131395	Deletion	Twice sequenced individuals
Chr1	48153911	48155606	Deletion	Twice sequenced individuals
Chr1	48269245	48269448	Deletion	Twice sequenced individuals
Chr1	48337084	48337121	Deletion	Twice sequenced individuals
Chr1	48339048	48339330	Deletion	Twice sequenced individuals
Chr1	48373017	48373348	Deletion	Twice sequenced individuals
Chr1	48493785	48493926	Deletion	Twice sequenced individuals
Chr1	48497511	48497538	Deletion	Twice sequenced individuals
Chr1	48513561	48513609	Deletion	Twice sequenced individuals
Chr1	48517410	48520622	Deletion	Twice sequenced individuals
Chr1	48543158	48543215	Deletion	Twice sequenced individuals
Chr1	48970366	48970503	Deletion	Twice sequenced individuals
Chr1	49099802	49100436	Deletion	Twice sequenced individuals
Chr1	49210606	49210682	Deletion	Twice sequenced individuals
Chr1	49274471	49275174	Deletion	Twice sequenced individuals
Chr1	49290820	49290854	Deletion	Twice sequenced individuals
Chr1	49402983	49404171	Deletion	Twice sequenced individuals
Chr1	49449833	49449916	Deletion	Twice sequenced individuals
Chr1	49592610	49593675	Deletion	Twice sequenced individuals
Chr1	50554068	50555102	Deletion	Twice sequenced individuals
Chr1	51022806	51023440	Deletion	Twice sequenced individuals
Chr1	51325442	51326170	Deletion	Twice sequenced individuals
Chr1	51426499	51426939	Deletion	Twice sequenced individuals
Chr1	51666213	51666376	Deletion	Twice sequenced individuals
Chr1	51700853	51702221	Deletion	Twice sequenced individuals
Chr1	51786421	51786475	Deletion	Twice sequenced individuals
Chr1	51786713	51786745	Deletion	Twice sequenced individuals
Chr1	52299617	52301452	Deletion	Twice sequenced individuals
Chr1	52751467	52751504	Deletion	Twice sequenced individuals
Chr1	53457471	53457521	Deletion	Twice sequenced individuals
Chr1	53620016	53620062	Deletion	Twice sequenced individuals
Chr1	54128158	54129156	Deletion	Twice sequenced individuals
Chr1	54242080	54242154	Deletion	Twice sequenced individuals
Chr1	54348214	54348380	Deletion	Twice sequenced individuals
Chr1	54422035	54422178	Deletion	Twice sequenced individuals
Chr1	54643687	54643724	Deletion	Twice sequenced individuals
Chr1	54992246	54992271	Deletion	Twice sequenced individuals
Chr1	55654757	55655123	Deletion	Twice sequenced individuals
Chr1	55658035	55659601	Deletion	Twice sequenced individuals
Chr1	56027793	56027841	Deletion	Twice sequenced individuals
Chr1	56079932	56079971	Deletion	Twice sequenced individuals
Chr1	56123248	56123465	Deletion	Twice sequenced individuals
Chr1	56168926	56168964	Deletion	Twice sequenced individuals
Chr1	56255108	56255157	Deletion	Twice sequenced individuals
Chr1	56578035	56578275	Deletion	Twice sequenced individuals
Chr1	56652558	56652611	Deletion	Twice sequenced individuals
Chr1	56836253	56837173	Deletion	Twice sequenced individuals
Chr1	56965198	56965241	Deletion	Twice sequenced individuals
Chr1	57031994	57032198	Deletion	Twice sequenced individuals
Chr1	57342154	57342180	Deletion	Twice sequenced individuals
Chr1	57346248	57346909	Deletion	Twice sequenced individuals
Chr1	57408433	57408494	Deletion	Twice sequenced individuals
Chr1	57492375	57492404	Deletion	Twice sequenced individuals
Chr1	57700922	57700983	Deletion	Twice sequenced individuals
Chr1	58016932	58018290	Deletion	Twice sequenced individuals
Chr1	58161981	58162031	Deletion	Twice sequenced individuals
Chr1	58267063	58267099	Deletion	Twice sequenced individuals
Chr1	58380464	58382412	Deletion	Twice sequenced individuals
Chr1	60454026	60454302	Deletion	Twice sequenced individuals
Chr1	60597373	60597403	Deletion	Twice sequenced individuals
Chr1	60647582	60647622	Deletion	Twice sequenced individuals
Chr1	61060492	61060661	Deletion	Twice sequenced individuals
Chr1	61277354	61277625	Deletion	Twice sequenced individuals
Chr1	61354659	61354905	Deletion	Twice sequenced individuals
Chr1	61547025	61547214	Deletion	Twice sequenced individuals
Chr1	61758844	61759914	Deletion	Twice sequenced individuals
Chr1	61855290	61856029	Deletion	Twice sequenced individuals
Chr1	61914995	61915059	Deletion	Twice sequenced individuals
Chr1	62130935	62130970	Deletion	Twice sequenced individuals
Chr1	62156361	62156456	Deletion	Twice sequenced individuals
Chr1	62642414	62642703	Deletion	Twice sequenced individuals
Chr1	62660761	62660836	Deletion	Twice sequenced individuals
Chr1	62758831	62758876	Deletion	Twice sequenced individuals
Chr1	62760638	62768428	Deletion	Twice sequenced individuals
Chr1	63195183	63195257	Deletion	Twice sequenced individuals
Chr1	64081055	64081149	Deletion	Twice sequenced individuals
Chr1	64129598	64129642	Deletion	Twice sequenced individuals
Chr1	64628390	64628432	Deletion	Twice sequenced individuals
Chr1	65788108	65791031	Deletion	Twice sequenced individuals
Chr1	65990029	65990078	Deletion	Twice sequenced individuals
Chr1	66181847	66181883	Deletion	Twice sequenced individuals
Chr1	66456178	66456278	Deletion	Twice sequenced individuals
Chr1	66548048	66548486	Deletion	Twice sequenced individuals
Chr1	66635790	66636753	Deletion	Twice sequenced individuals
Chr1	66642808	66642837	Deletion	Twice sequenced individuals
Chr1	66732102	66732426	Deletion	Twice sequenced individuals
Chr1	67042443	67042983	Deletion	Twice sequenced individuals
Chr1	67112397	67112445	Deletion	Twice sequenced individuals
Chr1	67308646	67308694	Deletion	Twice sequenced individuals
Chr1	67498695	67498809	Deletion	Twice sequenced individuals
Chr1	67693492	67693523	Deletion	Twice sequenced individuals
Chr1	67883847	67883901	Deletion	Twice sequenced individuals
Chr1	68163869	68164015	Deletion	Twice sequenced individuals
Chr1	68183869	68183904	Deletion	Twice sequenced individuals
Chr1	69478937	69479756	Deletion	Twice sequenced individuals
Chr1	69520824	69520870	Deletion	Twice sequenced individuals
Chr1	69849286	69849333	Deletion	Twice sequenced individuals
Chr1	69856625	69856672	Deletion	Twice sequenced individuals
Chr1	70039850	70040350	Deletion	Twice sequenced individuals
Chr1	70159733	70159762	Deletion	Twice sequenced individuals
Chr1	70225138	70225186	Deletion	Twice sequenced individuals
Chr1	70787044	70787084	Deletion	Twice sequenced individuals
Chr1	70839060	70839565	Deletion	Twice sequenced individuals
Chr1	70871652	70871684	Deletion	Twice sequenced individuals
Chr1	70885128	70885372	Deletion	Twice sequenced individuals
Chr1	70954954	70955018	Deletion	Twice sequenced individuals
Chr1	71090918	71091043	Deletion	Twice sequenced individuals
Chr1	71193527	71194007	Deletion	Twice sequenced individuals
Chr1	71215375	71215555	Deletion	Twice sequenced individuals
Chr1	71815675	71815730	Deletion	Twice sequenced individuals
Chr1	72324735	72324768	Deletion	Twice sequenced individuals
Chr1	72522565	72522609	Deletion	Twice sequenced individuals
Chr1	72891535	72892449	Deletion	Twice sequenced individuals
Chr1	73177332	73177452	Deletion	Twice sequenced individuals
Chr1	73901090	73901165	Deletion	Twice sequenced individuals
Chr1	74276180	74276232	Deletion	Twice sequenced individuals
Chr1	74834982	74835014	Deletion	Twice sequenced individuals
Chr1	75184440	75184573	Deletion	Twice sequenced individuals
Chr1	75542089	75542120	Deletion	Twice sequenced individuals
Chr1	76067933	76068214	Deletion	Twice sequenced individuals
Chr1	76115855	76115957	Deletion	Twice sequenced individuals
Chr1	76133098	76133237	Deletion	Twice sequenced individuals
Chr1	76173764	76173806	Deletion	Twice sequenced individuals
Chr1	76426327	76426380	Deletion	Twice sequenced individuals
Chr1	76843630	76843779	Deletion	Twice sequenced individuals
Chr1	76952406	76955010	Deletion	Twice sequenced individuals
Chr1	77230511	77230883	Deletion	Twice sequenced individuals
Chr1	77246358	77247050	Deletion	Twice sequenced individuals
Chr1	77499888	77500196	Deletion	Twice sequenced individuals
Chr1	77969101	77969193	Deletion	Twice sequenced individuals
Chr1	78608277	78608861	Deletion	Twice sequenced individuals
Chr1	78738977	78739006	Deletion	Twice sequenced individuals
Chr1	78775979	78777194	Deletion	Twice sequenced individuals
Chr1	78855979	78856271	Deletion	Twice sequenced individuals
Chr1	80701590	80702224	Deletion	Twice sequenced individuals
Chr1	80841215	80841246	Deletion	Twice sequenced individuals
Chr1	81628219	81628259	Deletion	Twice sequenced individuals
Chr1	82736137	82736168	Deletion	Twice sequenced individuals
Chr1	83320323	83320479	Deletion	Twice sequenced individuals
Chr1	84903438	84903919	Deletion	Twice sequenced individuals
Chr1	85065582	85065625	Deletion	Twice sequenced individuals
Chr1	85688803	85688928	Deletion	Twice sequenced individuals
Chr1	85760987	85761114	Deletion	Twice sequenced individuals
Chr1	85761204	85761315	Deletion	Twice sequenced individuals
Chr1	85878205	85878238	Deletion	Twice sequenced individuals
Chr1	87255258	87255366	Deletion	Twice sequenced individuals
Chr1	87505702	87506203	Deletion	Twice sequenced individuals
Chr1	87632487	87632524	Deletion	Twice sequenced individuals
Chr1	87882460	87882518	Deletion	Twice sequenced individuals
Chr1	87979767	87979796	Deletion	Twice sequenced individuals
Chr1	88637866	88637901	Deletion	Twice sequenced individuals
Chr1	88711068	88712361	Deletion	Twice sequenced individuals
Chr1	88813893	88813959	Deletion	Twice sequenced individuals
Chr1	89203517	89203556	Deletion	Twice sequenced individuals
Chr1	89228204	89228425	Deletion	Twice sequenced individuals
Chr1	89274282	89275015	Deletion	Twice sequenced individuals
Chr1	89323018	89323450	Deletion	Twice sequenced individuals
Chr1	89791524	89791570	Deletion	Twice sequenced individuals
Chr1	89798819	89798863	Deletion	Twice sequenced individuals
Chr1	89950625	89950676	Deletion	Twice sequenced individuals
Chr1	89990122	89990940	Deletion	Twice sequenced individuals
Chr1	91281929	91284542	Deletion	Twice sequenced individuals
Chr1	91623809	91623896	Deletion	Twice sequenced individuals
Chr1	91665663	91666147	Deletion	Twice sequenced individuals
Chr1	91964583	91964641	Deletion	Twice sequenced individuals
Chr1	92032592	92032936	Deletion	Twice sequenced individuals
Chr1	92699568	92700207	Deletion	Twice sequenced individuals
Chr1	92852407	92852977	Deletion	Twice sequenced individuals
Chr1	92937427	92937458	Deletion	Twice sequenced individuals
Chr1	93219991	93220032	Deletion	Twice sequenced individuals
Chr1	93224935	93224969	Deletion	Twice sequenced individuals
Chr1	93512315	93512375	Deletion	Twice sequenced individuals
Chr1	94366523	94367005	Deletion	Twice sequenced individuals
Chr1	94390929	94390972	Deletion	Twice sequenced individuals
Chr1	94511198	94511325	Deletion	Twice sequenced individuals
Chr1	94525946	94526619	Deletion	Twice sequenced individuals
Chr1	94593533	94593559	Deletion	Twice sequenced individuals
Chr1	94860546	94860577	Deletion	Twice sequenced individuals
Chr1	95272892	95273386	Deletion	Twice sequenced individuals
Chr1	95282985	95283021	Deletion	Twice sequenced individuals
Chr1	95433378	95433747	Deletion	Twice sequenced individuals
Chr1	96261860	96261888	Deletion	Twice sequenced individuals
Chr1	96414432	96414464	Deletion	Twice sequenced individuals
Chr1	96613000	96613028	Deletion	Twice sequenced individuals
Chr1	96641681	96643885	Deletion	Twice sequenced individuals
Chr1	96644940	96644973	Deletion	Twice sequenced individuals
Chr1	96947919	96947945	Deletion	Twice sequenced individuals
Chr1	97070540	97070572	Deletion	Twice sequenced individuals
Chr1	97720270	97720300	Deletion	Twice sequenced individuals
Chr1	97831234	97831273	Deletion	Twice sequenced individuals
Chr1	97928853	97928893	Deletion	Twice sequenced individuals
Chr1	98660442	98660570	Deletion	Twice sequenced individuals
Chr1	98793246	98793331	Deletion	Twice sequenced individuals
Chr1	98812709	98812787	Deletion	Twice sequenced individuals
Chr1	99134230	99134325	Deletion	Twice sequenced individuals
Chr1	99251020	99251153	Deletion	Twice sequenced individuals
Chr1	99340984	99341038	Deletion	Twice sequenced individuals
Chr1	100086308	100086448	Deletion	Twice sequenced individuals
Chr1	100788564	100788594	Deletion	Twice sequenced individuals
Chr1	100864891	100864917	Deletion	Twice sequenced individuals
Chr1	101022001	101023336	Deletion	Twice sequenced individuals
Chr1	101089801	101089958	Deletion	Twice sequenced individuals
Chr1	101136163	101136447	Deletion	Twice sequenced individuals
Chr1	101144963	101145834	Deletion	Twice sequenced individuals
Chr1	101180873	101180902	Deletion	Twice sequenced individuals
Chr1	101219895	101221064	Deletion	Twice sequenced individuals
Chr1	101416727	101416754	Deletion	Twice sequenced individuals
Chr1	101465885	101467770	Deletion	Twice sequenced individuals
Chr1	101931889	101932657	Deletion	Twice sequenced individuals
Chr1	101939973	101941263	Deletion	Twice sequenced individuals
Chr1	102009264	102009372	Deletion	Twice sequenced individuals
Chr1	102030989	102032413	Deletion	Twice sequenced individuals
Chr1	102078641	102078706	Deletion	Twice sequenced individuals
Chr1	102078852	102078887	Deletion	Twice sequenced individuals
Chr1	102248093	102248142	Deletion	Twice sequenced individuals
Chr1	102724389	102724456	Deletion	Twice sequenced individuals
Chr1	102868086	102868202	Deletion	Twice sequenced individuals
Chr1	103047622	103047652	Deletion	Twice sequenced individuals
Chr1	103096052	103096429	Deletion	Twice sequenced individuals
Chr1	103110458	103112450	Deletion	Twice sequenced individuals
Chr1	103354651	103354688	Deletion	Twice sequenced individuals
Chr1	103404911	103405181	Deletion	Twice sequenced individuals
Chr1	103505822	103505871	Deletion	Twice sequenced individuals
Chr1	103585081	103588265	Deletion	Twice sequenced individuals
Chr1	103837530	103837912	Deletion	Twice sequenced individuals
Chr1	104001817	104002876	Deletion	Twice sequenced individuals
Chr1	104266268	104266388	Deletion	Twice sequenced individuals
Chr1	104750729	104750946	Deletion	Twice sequenced individuals
Chr1	104915433	104916080	Deletion	Twice sequenced individuals
Chr1	104945309	104946548	Deletion	Twice sequenced individuals
Chr1	105016567	105016621	Deletion	Twice sequenced individuals
Chr1	105054793	105054867	Deletion	Twice sequenced individuals
Chr1	105063443	105063590	Deletion	Twice sequenced individuals
Chr1	105087894	105090663	Deletion	Twice sequenced individuals
Chr1	105316450	105316512	Deletion	Twice sequenced individuals
Chr1	105330356	105330382	Deletion	Twice sequenced individuals
Chr1	105737062	105737228	Deletion	Twice sequenced individuals
Chr1	105769476	105769547	Deletion	Twice sequenced individuals
Chr1	105992467	105992704	Deletion	Twice sequenced individuals
Chr1	106285316	106285346	Deletion	Twice sequenced individuals
Chr1	107316249	107316328	Deletion	Twice sequenced individuals
Chr1	107529537	107530231	Deletion	Twice sequenced individuals
Chr1	107575617	107575645	Deletion	Twice sequenced individuals
Chr1	107955444	107955591	Deletion	Twice sequenced individuals
Chr1	107969059	107970137	Deletion	Twice sequenced individuals
Chr1	108070809	108070842	Deletion	Twice sequenced individuals
Chr1	108389888	108389919	Deletion	Twice sequenced individuals
Chr1	108440919	108440972	Deletion	Twice sequenced individuals
Chr1	108528578	108528805	Deletion	Twice sequenced individuals
Chr1	108733120	108733845	Deletion	Twice sequenced individuals
Chr1	108784715	108786017	Deletion	Twice sequenced individuals
Chr1	108809318	108809408	Deletion	Twice sequenced individuals
Chr1	108848449	108848503	Deletion	Twice sequenced individuals
Chr1	109272978	109273012	Deletion	Twice sequenced individuals
Chr1	109431186	109431262	Deletion	Twice sequenced individuals
Chr1	109676052	109676078	Deletion	Twice sequenced individuals
Chr1	110448113	110448144	Deletion	Twice sequenced individuals
Chr1	110526363	110526413	Deletion	Twice sequenced individuals
Chr1	111062579	111062621	Deletion	Twice sequenced individuals
Chr1	111210142	111210247	Deletion	Twice sequenced individuals
Chr1	111293242	111293729	Deletion	Twice sequenced individuals
Chr1	111537933	111538323	Deletion	Twice sequenced individuals
Chr1	111591580	111591781	Deletion	Twice sequenced individuals
Chr1	111666476	111666838	Deletion	Twice sequenced individuals
Chr1	112190356	112190458	Deletion	Twice sequenced individuals
Chr1	112216903	112216933	Deletion	Twice sequenced individuals
Chr1	112469889	112470038	Deletion	Twice sequenced individuals
Chr1	112532541	112532580	Deletion	Twice sequenced individuals
Chr1	112779646	112779679	Deletion	Twice sequenced individuals
Chr1	113078935	113078964	Deletion	Twice sequenced individuals
Chr1	113154205	113154235	Deletion	Twice sequenced individuals
Chr1	113275338	113275377	Deletion	Twice sequenced individuals
Chr1	114126135	114126173	Deletion	Twice sequenced individuals
Chr1	114402640	114402671	Deletion	Twice sequenced individuals
Chr1	115032550	115032759	Deletion	Twice sequenced individuals
Chr1	115303048	115303188	Deletion	Twice sequenced individuals
Chr1	115449360	115449462	Deletion	Twice sequenced individuals
Chr1	115470403	115470474	Deletion	Twice sequenced individuals
Chr1	116420679	116420717	Deletion	Twice sequenced individuals
Chr1	116440563	116440589	Deletion	Twice sequenced individuals
Chr1	116464744	116464774	Deletion	Twice sequenced individuals
Chr1	116481630	116481842	Deletion	Twice sequenced individuals
Chr1	116587724	116587769	Deletion	Twice sequenced individuals
Chr1	116759401	116759433	Deletion	Twice sequenced individuals
Chr1	116923436	116927273	Deletion	Twice sequenced individuals
Chr1	117484912	117485055	Deletion	Twice sequenced individuals
Chr1	118647223	118647312	Deletion	Twice sequenced individuals
Chr1	118720147	118722156	Deletion	Twice sequenced individuals
Chr1	119029894	119029947	Deletion	Twice sequenced individuals
Chr1	119234748	119234788	Deletion	Twice sequenced individuals
Chr1	119325196	119325280	Deletion	Twice sequenced individuals
Chr1	119459169	119459207	Deletion	Twice sequenced individuals
Chr1	119512655	119512685	Deletion	Twice sequenced individuals
Chr1	120110660	120111260	Deletion	Twice sequenced individuals
Chr1	120646173	120646230	Deletion	Twice sequenced individuals
Chr1	120757418	120757559	Deletion	Twice sequenced individuals
Chr1	120895833	120896061	Deletion	Twice sequenced individuals
Chr1	120896579	120898487	Deletion	Twice sequenced individuals
Chr1	121379887	121380913	Deletion	Twice sequenced individuals
Chr1	121553931	121554953	Deletion	Twice sequenced individuals
Chr1	122903800	122904521	Deletion	Twice sequenced individuals
Chr1	123009491	123013288	Deletion	Twice sequenced individuals
Chr1	123256306	123256358	Deletion	Twice sequenced individuals
Chr1	123511173	123511306	Deletion	Twice sequenced individuals
Chr1	123534757	123534796	Deletion	Twice sequenced individuals
Chr1	123649176	123649871	Deletion	Twice sequenced individuals
Chr1	123707165	123707206	Deletion	Twice sequenced individuals
Chr1	123825531	123825573	Deletion	Twice sequenced individuals
Chr1	123985594	123985828	Deletion	Twice sequenced individuals
Chr1	124084306	124084346	Deletion	Twice sequenced individuals
Chr1	124142112	124151521	Deletion	Twice sequenced individuals
Chr1	124509467	124510177	Deletion	Twice sequenced individuals
Chr1	124757941	124757979	Deletion	Twice sequenced individuals
Chr1	124847673	124847703	Deletion	Twice sequenced individuals
Chr1	124902780	124902818	Deletion	Twice sequenced individuals
Chr1	125096635	125102167	Deletion	Twice sequenced individuals
Chr1	125777989	125778084	Deletion	Twice sequenced individuals
Chr1	125817736	125818597	Deletion	Twice sequenced individuals
Chr1	125998650	125998702	Deletion	Twice sequenced individuals
Chr1	126210345	126210412	Deletion	Twice sequenced individuals
Chr1	126255818	126256164	Deletion	Twice sequenced individuals
Chr1	126342271	126342974	Deletion	Twice sequenced individuals
Chr1	127669314	127669348	Deletion	Twice sequenced individuals
Chr1	127846923	127847117	Deletion	Twice sequenced individuals
Chr1	128019344	128019381	Deletion	Twice sequenced individuals
Chr1	128274494	128274525	Deletion	Twice sequenced individuals
Chr1	128299885	128300465	Deletion	Twice sequenced individuals
Chr1	128476505	128476555	Deletion	Twice sequenced individuals
Chr1	129094446	129094484	Deletion	Twice sequenced individuals
Chr1	129156459	129157715	Deletion	Twice sequenced individuals
Chr1	129831852	129831962	Deletion	Twice sequenced individuals
Chr1	129889339	129889428	Deletion	Twice sequenced individuals
Chr1	130214559	130214869	Deletion	Twice sequenced individuals
Chr1	130384688	130385570	Deletion	Twice sequenced individuals
Chr1	130413409	130413564	Deletion	Twice sequenced individuals
Chr1	130924289	130924498	Deletion	Twice sequenced individuals
Chr1	131025415	131025451	Deletion	Twice sequenced individuals
Chr1	131029995	131030045	Deletion	Twice sequenced individuals
Chr1	131101362	131102260	Deletion	Twice sequenced individuals
Chr1	131322989	131323041	Deletion	Twice sequenced individuals
Chr1	131325874	131325957	Deletion	Twice sequenced individuals
Chr1	131391718	131391774	Deletion	Twice sequenced individuals
Chr1	132139149	132140440	Deletion	Twice sequenced individuals
Chr1	132222416	132222452	Deletion	Twice sequenced individuals
Chr1	132512676	132512709	Deletion	Twice sequenced individuals
Chr1	133293824	133293879	Deletion	Twice sequenced individuals
Chr1	133610401	133610491	Deletion	Twice sequenced individuals
Chr1	134584601	134584626	Deletion	Twice sequenced individuals
Chr1	134682486	134683802	Deletion	Twice sequenced individuals
Chr1	134939289	134940728	Deletion	Twice sequenced individuals
Chr1	134957109	134962750	Deletion	Twice sequenced individuals
Chr1	135451273	135451312	Deletion	Twice sequenced individuals
Chr1	135492211	135492389	Deletion	Twice sequenced individuals
Chr1	135775083	135775121	Deletion	Twice sequenced individuals
Chr1	136191672	136191717	Deletion	Twice sequenced individuals
Chr1	136398922	136399055	Deletion	Twice sequenced individuals
Chr1	136602468	136602519	Deletion	Twice sequenced individuals
Chr1	136976398	136976586	Deletion	Twice sequenced individuals
Chr1	137031656	137031724	Deletion	Twice sequenced individuals
Chr1	137446552	137446621	Deletion	Twice sequenced individuals
Chr1	137829578	137829604	Deletion	Twice sequenced individuals
Chr1	138168244	138168309	Deletion	Twice sequenced individuals
Chr1	138188657	138188704	Deletion	Twice sequenced individuals
Chr1	138426582	138426987	Deletion	Twice sequenced individuals
Chr1	138707790	138707844	Deletion	Twice sequenced individuals
Chr1	138895362	138895525	Deletion	Twice sequenced individuals
Chr1	138941433	138941739	Deletion	Twice sequenced individuals
Chr1	138996049	138996079	Deletion	Twice sequenced individuals
Chr1	139222172	139222216	Deletion	Twice sequenced individuals
Chr1	139778277	139778400	Deletion	Twice sequenced individuals
Chr1	139897964	139898004	Deletion	Twice sequenced individuals
Chr1	139972090	139972120	Deletion	Twice sequenced individuals
Chr1	140561290	140561537	Deletion	Twice sequenced individuals
Chr1	140572246	140572680	Deletion	Twice sequenced individuals
Chr1	140610506	140610532	Deletion	Twice sequenced individuals
Chr1	140724585	140724615	Deletion	Twice sequenced individuals
Chr1	141645358	141646631	Deletion	Twice sequenced individuals
Chr1	141999566	141999797	Deletion	Twice sequenced individuals
Chr1	142126025	142126149	Deletion	Twice sequenced individuals
Chr1	142281544	142281583	Deletion	Twice sequenced individuals
Chr1	142334461	142334660	Deletion	Twice sequenced individuals
Chr1	142349039	142349259	Deletion	Twice sequenced individuals
Chr1	142558129	142558155	Deletion	Twice sequenced individuals
Chr1	142840309	142840341	Deletion	Twice sequenced individuals
Chr1	142952230	142952270	Deletion	Twice sequenced individuals
Chr1	143096689	143096881	Deletion	Twice sequenced individuals
Chr1	143112028	143112056	Deletion	Twice sequenced individuals
Chr1	143300777	143300828	Deletion	Twice sequenced individuals
Chr1	143366035	143366062	Deletion	Twice sequenced individuals
Chr1	143885744	143887312	Deletion	Twice sequenced individuals
Chr1	143897774	143898026	Deletion	Twice sequenced individuals
Chr1	143968813	143968892	Deletion	Twice sequenced individuals
Chr1	144141847	144142031	Deletion	Twice sequenced individuals
Chr1	144534950	144534992	Deletion	Twice sequenced individuals
Chr1	144950472	144950533	Deletion	Twice sequenced individuals
Chr1	145429535	145430260	Deletion	Twice sequenced individuals
Chr1	145912517	145912546	Deletion	Twice sequenced individuals
Chr1	146998117	146998179	Deletion	Twice sequenced individuals
Chr1	147013949	147013999	Deletion	Twice sequenced individuals
Chr1	147921110	147921420	Deletion	Twice sequenced individuals
Chr1	148322005	148322046	Deletion	Twice sequenced individuals
Chr1	148480454	148480514	Deletion	Twice sequenced individuals
Chr1	148504322	148504375	Deletion	Twice sequenced individuals
Chr1	148761584	148761680	Deletion	Twice sequenced individuals
Chr1	148890078	148897715	Deletion	Twice sequenced individuals
Chr1	148935299	148935398	Deletion	Twice sequenced individuals
Chr1	149113359	149113387	Deletion	Twice sequenced individuals
Chr1	149229982	149230048	Deletion	Twice sequenced individuals
Chr1	149243817	149243896	Deletion	Twice sequenced individuals
Chr1	149289869	149289900	Deletion	Twice sequenced individuals
Chr1	149343123	149343751	Deletion	Twice sequenced individuals
Chr1	149364317	149364481	Deletion	Twice sequenced individuals
Chr1	149380979	149382278	Deletion	Twice sequenced individuals
Chr1	149401665	149401987	Deletion	Twice sequenced individuals
Chr1	149461100	149461138	Deletion	Twice sequenced individuals
Chr1	149599521	149599642	Deletion	Twice sequenced individuals
Chr1	149824391	149824492	Deletion	Twice sequenced individuals
Chr1	150060513	150060986	Deletion	Twice sequenced individuals
Chr1	150488725	150488761	Deletion	Twice sequenced individuals
Chr1	150609645	150609677	Deletion	Twice sequenced individuals
Chr1	150957262	150957339	Deletion	Twice sequenced individuals
Chr1	151552675	151552718	Deletion	Twice sequenced individuals
Chr1	151630648	151631239	Deletion	Twice sequenced individuals
Chr1	152101248	152101286	Deletion	Twice sequenced individuals
Chr1	152461747	152462082	Deletion	Twice sequenced individuals
Chr1	152582156	152582194	Deletion	Twice sequenced individuals
Chr1	152963892	152963960	Deletion	Twice sequenced individuals
Chr1	153135743	153135910	Deletion	Twice sequenced individuals
Chr1	153648046	153648114	Deletion	Twice sequenced individuals
Chr1	153721638	153721677	Deletion	Twice sequenced individuals
Chr1	153756437	153756533	Deletion	Twice sequenced individuals
Chr1	153903983	153904911	Deletion	Twice sequenced individuals
Chr1	154261813	154262281	Deletion	Twice sequenced individuals
Chr1	154913350	154913424	Deletion	Twice sequenced individuals
Chr1	154938670	154938746	Deletion	Twice sequenced individuals
Chr1	155030828	155030865	Deletion	Twice sequenced individuals
Chr1	155032527	155032757	Deletion	Twice sequenced individuals
Chr1	155174803	155174856	Deletion	Twice sequenced individuals
Chr1	155258037	155258076	Deletion	Twice sequenced individuals
Chr1	155426191	155426229	Deletion	Twice sequenced individuals
Chr1	156053450	156053502	Deletion	Twice sequenced individuals
Chr1	156092419	156092449	Deletion	Twice sequenced individuals
Chr1	156265289	156265319	Deletion	Twice sequenced individuals
Chr1	156402393	156403468	Deletion	Twice sequenced individuals
Chr1	156786646	156788141	Deletion	Twice sequenced individuals
Chr1	157130098	157130260	Deletion	Twice sequenced individuals
Chr1	157867322	157867484	Deletion	Twice sequenced individuals
Chr1	158040863	158040906	Deletion	Twice sequenced individuals
Chr2	429816	429847	Deletion	Twice sequenced individuals
Chr2	588088	588113	Deletion	Twice sequenced individuals
Chr2	596080	596141	Deletion	Twice sequenced individuals
Chr2	1027691	1027730	Deletion	Twice sequenced individuals
Chr2	1348810	1350554	Deletion	Twice sequenced individuals
Chr2	1573428	1573501	Deletion	Twice sequenced individuals
Chr2	1904325	1904466	Deletion	Twice sequenced individuals
Chr2	2148287	2148366	Deletion	Twice sequenced individuals
Chr2	2253308	2253691	Deletion	Twice sequenced individuals
Chr2	2316620	2316655	Deletion	Twice sequenced individuals
Chr2	2434823	2434862	Deletion	Twice sequenced individuals
Chr2	2596886	2596931	Deletion	Twice sequenced individuals
Chr2	2699452	2700338	Deletion	Twice sequenced individuals
Chr2	2804080	2804122	Deletion	Twice sequenced individuals
Chr2	2845312	2847052	Deletion	Twice sequenced individuals
Chr2	2948074	2948114	Deletion	Twice sequenced individuals
Chr2	3063518	3063594	Deletion	Twice sequenced individuals
Chr2	3498071	3498100	Deletion	Twice sequenced individuals
Chr2	3744890	3744968	Deletion	Twice sequenced individuals
Chr2	3828744	3828779	Deletion	Twice sequenced individuals
Chr2	3941485	3941618	Deletion	Twice sequenced individuals
Chr2	4033854	4034473	Deletion	Twice sequenced individuals
Chr2	4655791	4655822	Deletion	Twice sequenced individuals
Chr2	4829471	4829510	Deletion	Twice sequenced individuals
Chr2	5266169	5266239	Deletion	Twice sequenced individuals
Chr2	5646176	5646209	Deletion	Twice sequenced individuals
Chr2	6051621	6053545	Deletion	Twice sequenced individuals
Chr2	6114002	6114048	Deletion	Twice sequenced individuals
Chr2	6311243	6311291	Deletion	Twice sequenced individuals
Chr2	6606383	6607680	Deletion	Twice sequenced individuals
Chr2	6639465	6639889	Deletion	Twice sequenced individuals
Chr2	6695343	6695379	Deletion	Twice sequenced individuals
Chr2	6869474	6869880	Deletion	Twice sequenced individuals
Chr2	7087449	7087477	Deletion	Twice sequenced individuals
Chr2	7196309	7196418	Deletion	Twice sequenced individuals
Chr2	7651450	7651511	Deletion	Twice sequenced individuals
Chr2	7890357	7890382	Deletion	Twice sequenced individuals
Chr2	8223870	8223895	Deletion	Twice sequenced individuals
Chr2	8527940	8527986	Deletion	Twice sequenced individuals
Chr2	8531983	8532020	Deletion	Twice sequenced individuals
Chr2	8562870	8563550	Deletion	Twice sequenced individuals
Chr2	8634921	8635197	Deletion	Twice sequenced individuals
Chr2	8650037	8656408	Deletion	Twice sequenced individuals
Chr2	8802291	8804787	Deletion	Twice sequenced individuals
Chr2	8920924	8921414	Deletion	Twice sequenced individuals
Chr2	8959943	8960412	Deletion	Twice sequenced individuals
Chr2	9557599	9558063	Deletion	Twice sequenced individuals
Chr2	9973551	9973594	Deletion	Twice sequenced individuals
Chr2	10525085	10525547	Deletion	Twice sequenced individuals
Chr2	11141821	11141890	Deletion	Twice sequenced individuals
Chr2	11320753	11326496	Deletion	Twice sequenced individuals
Chr2	11351607	11351644	Deletion	Twice sequenced individuals
Chr2	11526315	11527901	Deletion	Twice sequenced individuals
Chr2	11548846	11549206	Deletion	Twice sequenced individuals
Chr2	11617351	11617376	Deletion	Twice sequenced individuals
Chr2	11675054	11675092	Deletion	Twice sequenced individuals
Chr2	11887008	11887256	Deletion	Twice sequenced individuals
Chr2	11979084	11979319	Deletion	Twice sequenced individuals
Chr2	12008452	12008507	Deletion	Twice sequenced individuals
Chr2	12175938	12176101	Deletion	Twice sequenced individuals
Chr2	12181830	12181878	Deletion	Twice sequenced individuals
Chr2	12188070	12188125	Deletion	Twice sequenced individuals
Chr2	12244176	12244406	Deletion	Twice sequenced individuals
Chr2	12291152	12291904	Deletion	Twice sequenced individuals
Chr2	12540644	12540686	Deletion	Twice sequenced individuals
Chr2	12616009	12616172	Deletion	Twice sequenced individuals
Chr2	13134745	13134796	Deletion	Twice sequenced individuals
Chr2	13217164	13217677	Deletion	Twice sequenced individuals
Chr2	13324750	13325751	Deletion	Twice sequenced individuals
Chr2	13503237	13503271	Deletion	Twice sequenced individuals
Chr2	13772728	13772765	Deletion	Twice sequenced individuals
Chr2	13773502	13773535	Deletion	Twice sequenced individuals
Chr2	13830444	13830494	Deletion	Twice sequenced individuals
Chr2	13926700	13926752	Deletion	Twice sequenced individuals
Chr2	13997253	13997303	Deletion	Twice sequenced individuals
Chr2	14088674	14088706	Deletion	Twice sequenced individuals
Chr2	14341032	14341693	Deletion	Twice sequenced individuals
Chr2	14550224	14550309	Deletion	Twice sequenced individuals
Chr2	14607883	14608218	Deletion	Twice sequenced individuals
Chr2	14627779	14627922	Deletion	Twice sequenced individuals
Chr2	14728683	14728718	Deletion	Twice sequenced individuals
Chr2	14935734	14935837	Deletion	Twice sequenced individuals
Chr2	15204191	15204224	Deletion	Twice sequenced individuals
Chr2	15240289	15240329	Deletion	Twice sequenced individuals
Chr2	15392095	15392769	Deletion	Twice sequenced individuals
Chr2	15404301	15405846	Deletion	Twice sequenced individuals
Chr2	15552810	15552912	Deletion	Twice sequenced individuals
Chr2	15868865	15869007	Deletion	Twice sequenced individuals
Chr2	15928245	15928289	Deletion	Twice sequenced individuals
Chr2	15997206	15997486	Deletion	Twice sequenced individuals
Chr2	16330275	16330305	Deletion	Twice sequenced individuals
Chr2	16558713	16559952	Deletion	Twice sequenced individuals
Chr2	16695054	16695144	Deletion	Twice sequenced individuals
Chr2	17206871	17206897	Deletion	Twice sequenced individuals
Chr2	17207091	17207153	Deletion	Twice sequenced individuals
Chr2	17209334	17209365	Deletion	Twice sequenced individuals
Chr2	17353364	17354416	Deletion	Twice sequenced individuals
Chr2	17357369	17357424	Deletion	Twice sequenced individuals
Chr2	17435153	17438932	Deletion	Twice sequenced individuals
Chr2	17470989	17471058	Deletion	Twice sequenced individuals
Chr2	17478123	17478400	Deletion	Twice sequenced individuals
Chr2	17860159	17860551	Deletion	Twice sequenced individuals
Chr2	17920629	17923315	Deletion	Twice sequenced individuals
Chr2	18100853	18100926	Deletion	Twice sequenced individuals
Chr2	18103343	18104378	Deletion	Twice sequenced individuals
Chr2	18374896	18374925	Deletion	Twice sequenced individuals
Chr2	18492226	18492454	Deletion	Twice sequenced individuals
Chr2	18553136	18553172	Deletion	Twice sequenced individuals
Chr2	18604343	18604374	Deletion	Twice sequenced individuals
Chr2	18727164	18727192	Deletion	Twice sequenced individuals
Chr2	19511006	19511354	Deletion	Twice sequenced individuals
Chr2	19626736	19626764	Deletion	Twice sequenced individuals
Chr2	21114722	21114865	Deletion	Twice sequenced individuals
Chr2	22361298	22361339	Deletion	Twice sequenced individuals
Chr2	22389895	22390249	Deletion	Twice sequenced individuals
Chr2	22722391	22722453	Deletion	Twice sequenced individuals
Chr2	23636504	23636532	Deletion	Twice sequenced individuals
Chr2	23640563	23640684	Deletion	Twice sequenced individuals
Chr2	23914671	23914697	Deletion	Twice sequenced individuals
Chr2	24010788	24012626	Deletion	Twice sequenced individuals
Chr2	24356471	24356815	Deletion	Twice sequenced individuals
Chr2	24368906	24368939	Deletion	Twice sequenced individuals
Chr2	24441931	24442070	Deletion	Twice sequenced individuals
Chr2	24908150	24908197	Deletion	Twice sequenced individuals
Chr2	24927776	24927818	Deletion	Twice sequenced individuals
Chr2	25691984	25692028	Deletion	Twice sequenced individuals
Chr2	26127449	26129085	Deletion	Twice sequenced individuals
Chr2	26386394	26386483	Deletion	Twice sequenced individuals
Chr2	27040777	27040916	Deletion	Twice sequenced individuals
Chr2	27379305	27379398	Deletion	Twice sequenced individuals
Chr2	27551716	27551767	Deletion	Twice sequenced individuals
Chr2	27627055	27627087	Deletion	Twice sequenced individuals
Chr2	27677321	27677427	Deletion	Twice sequenced individuals
Chr2	28172883	28172943	Deletion	Twice sequenced individuals
Chr2	28261848	28261882	Deletion	Twice sequenced individuals
Chr2	28496467	28498272	Deletion	Twice sequenced individuals
Chr2	28501632	28501663	Deletion	Twice sequenced individuals
Chr2	28641688	28642540	Deletion	Twice sequenced individuals
Chr2	28828096	28828126	Deletion	Twice sequenced individuals
Chr2	29005798	29006276	Deletion	Twice sequenced individuals
Chr2	29012832	29012948	Deletion	Twice sequenced individuals
Chr2	29484122	29484462	Deletion	Twice sequenced individuals
Chr2	29498045	29498083	Deletion	Twice sequenced individuals
Chr2	29594010	29594049	Deletion	Twice sequenced individuals
Chr2	29815141	29816231	Deletion	Twice sequenced individuals
Chr2	29894180	29894225	Deletion	Twice sequenced individuals
Chr2	30052100	30052265	Deletion	Twice sequenced individuals
Chr2	30312980	30313193	Deletion	Twice sequenced individuals
Chr2	30734201	30734279	Deletion	Twice sequenced individuals
Chr2	30743562	30743591	Deletion	Twice sequenced individuals
Chr2	30906081	30906112	Deletion	Twice sequenced individuals
Chr2	31634105	31634218	Deletion	Twice sequenced individuals
Chr2	31719621	31719673	Deletion	Twice sequenced individuals
Chr2	31762621	31762652	Deletion	Twice sequenced individuals
Chr2	32127513	32127773	Deletion	Twice sequenced individuals
Chr2	32486315	32490282	Deletion	Twice sequenced individuals
Chr2	32515852	32515892	Deletion	Twice sequenced individuals
Chr2	32618565	32618605	Deletion	Twice sequenced individuals
Chr2	32945660	32945697	Deletion	Twice sequenced individuals
Chr2	33213484	33213576	Deletion	Twice sequenced individuals
Chr2	33447788	33450348	Deletion	Twice sequenced individuals
Chr2	33540848	33540977	Deletion	Twice sequenced individuals
Chr2	33560219	33560249	Deletion	Twice sequenced individuals
Chr2	33684700	33684753	Deletion	Twice sequenced individuals
Chr2	33811764	33811886	Deletion	Twice sequenced individuals
Chr2	33834351	33834488	Deletion	Twice sequenced individuals
Chr2	33842941	33844340	Deletion	Twice sequenced individuals
Chr2	33877391	33878038	Deletion	Twice sequenced individuals
Chr2	35072686	35072730	Deletion	Twice sequenced individuals
Chr2	36319030	36319498	Deletion	Twice sequenced individuals
Chr2	36605144	36605518	Deletion	Twice sequenced individuals
Chr2	36725162	36725242	Deletion	Twice sequenced individuals
Chr2	37761717	37761818	Deletion	Twice sequenced individuals
Chr2	38037829	38039164	Deletion	Twice sequenced individuals
Chr2	38076733	38076773	Deletion	Twice sequenced individuals
Chr2	38316383	38316412	Deletion	Twice sequenced individuals
Chr2	38324875	38324916	Deletion	Twice sequenced individuals
Chr2	38336894	38336987	Deletion	Twice sequenced individuals
Chr2	38398627	38398657	Deletion	Twice sequenced individuals
Chr2	38401202	38401345	Deletion	Twice sequenced individuals
Chr2	38687812	38688676	Deletion	Twice sequenced individuals
Chr2	38998316	38998348	Deletion	Twice sequenced individuals
Chr2	39082378	39082718	Deletion	Twice sequenced individuals
Chr2	39219320	39219358	Deletion	Twice sequenced individuals
Chr2	39397255	39397296	Deletion	Twice sequenced individuals
Chr2	39441184	39442480	Deletion	Twice sequenced individuals
Chr2	39801482	39801910	Deletion	Twice sequenced individuals
Chr2	39977329	39977482	Deletion	Twice sequenced individuals
Chr2	40949060	40949109	Deletion	Twice sequenced individuals
Chr2	41067929	41068072	Deletion	Twice sequenced individuals
Chr2	41536158	41536186	Deletion	Twice sequenced individuals
Chr2	41740790	41741292	Deletion	Twice sequenced individuals
Chr2	42898622	42900076	Deletion	Twice sequenced individuals
Chr2	43299417	43299638	Deletion	Twice sequenced individuals
Chr2	43381457	43382664	Deletion	Twice sequenced individuals
Chr2	44478992	44479146	Deletion	Twice sequenced individuals
Chr2	44506337	44506379	Deletion	Twice sequenced individuals
Chr2	44663510	44663566	Deletion	Twice sequenced individuals
Chr2	45067775	45067810	Deletion	Twice sequenced individuals
Chr2	45219078	45220472	Deletion	Twice sequenced individuals
Chr2	45324746	45325362	Deletion	Twice sequenced individuals
Chr2	45611034	45611398	Deletion	Twice sequenced individuals
Chr2	45901092	45902016	Deletion	Twice sequenced individuals
Chr2	45990033	45991293	Deletion	Twice sequenced individuals
Chr2	46074567	46074597	Deletion	Twice sequenced individuals
Chr2	46275968	46277195	Deletion	Twice sequenced individuals
Chr2	46283550	46283582	Deletion	Twice sequenced individuals
Chr2	46924577	46927777	Deletion	Twice sequenced individuals
Chr2	47073362	47073493	Deletion	Twice sequenced individuals
Chr2	47398861	47398907	Deletion	Twice sequenced individuals
Chr2	47695584	47695626	Deletion	Twice sequenced individuals
Chr2	48261092	48261121	Deletion	Twice sequenced individuals
Chr2	48696865	48696904	Deletion	Twice sequenced individuals
Chr2	49071040	49071079	Deletion	Twice sequenced individuals
Chr2	49101206	49102384	Deletion	Twice sequenced individuals
Chr2	49177202	49177253	Deletion	Twice sequenced individuals
Chr2	49208077	49208228	Deletion	Twice sequenced individuals
Chr2	49362848	49362958	Deletion	Twice sequenced individuals
Chr2	50418758	50418892	Deletion	Twice sequenced individuals
Chr2	50446859	50446966	Deletion	Twice sequenced individuals
Chr2	50597999	50598024	Deletion	Twice sequenced individuals
Chr2	50693253	50693294	Deletion	Twice sequenced individuals
Chr2	51405931	51405977	Deletion	Twice sequenced individuals
Chr2	51433924	51433953	Deletion	Twice sequenced individuals
Chr2	51813541	51813573	Deletion	Twice sequenced individuals
Chr2	52125696	52125750	Deletion	Twice sequenced individuals
Chr2	52401012	52401044	Deletion	Twice sequenced individuals
Chr2	52667470	52667569	Deletion	Twice sequenced individuals
Chr2	52829833	52829869	Deletion	Twice sequenced individuals
Chr2	52951470	52952432	Deletion	Twice sequenced individuals
Chr2	53606056	53606085	Deletion	Twice sequenced individuals
Chr2	53969150	53969449	Deletion	Twice sequenced individuals
Chr2	54277336	54277371	Deletion	Twice sequenced individuals
Chr2	54317775	54318160	Deletion	Twice sequenced individuals
Chr2	54359223	54359259	Deletion	Twice sequenced individuals
Chr2	54434089	54434118	Deletion	Twice sequenced individuals
Chr2	54497531	54497735	Deletion	Twice sequenced individuals
Chr2	54557424	54557460	Deletion	Twice sequenced individuals
Chr2	54924018	54924069	Deletion	Twice sequenced individuals
Chr2	54943898	54943962	Deletion	Twice sequenced individuals
Chr2	55024951	55025526	Deletion	Twice sequenced individuals
Chr2	55037174	55037207	Deletion	Twice sequenced individuals
Chr2	55095132	55095241	Deletion	Twice sequenced individuals
Chr2	55196640	55196676	Deletion	Twice sequenced individuals
Chr2	56013875	56013905	Deletion	Twice sequenced individuals
Chr2	56096722	56096756	Deletion	Twice sequenced individuals
Chr2	56136429	56136709	Deletion	Twice sequenced individuals
Chr2	56442927	56443032	Deletion	Twice sequenced individuals
Chr2	56903806	56903905	Deletion	Twice sequenced individuals
Chr2	57334801	57334872	Deletion	Twice sequenced individuals
Chr2	57377754	57377801	Deletion	Twice sequenced individuals
Chr2	57399390	57400725	Deletion	Twice sequenced individuals
Chr2	57476900	57477014	Deletion	Twice sequenced individuals
Chr2	57479197	57479228	Deletion	Twice sequenced individuals
Chr2	57530360	57530389	Deletion	Twice sequenced individuals
Chr2	57554340	57554418	Deletion	Twice sequenced individuals
Chr2	57900008	57900066	Deletion	Twice sequenced individuals
Chr2	58152731	58153236	Deletion	Twice sequenced individuals
Chr2	59039017	59039054	Deletion	Twice sequenced individuals
Chr2	59094295	59094323	Deletion	Twice sequenced individuals
Chr2	59108160	59108198	Deletion	Twice sequenced individuals
Chr2	59590239	59590275	Deletion	Twice sequenced individuals
Chr2	59767397	59767595	Deletion	Twice sequenced individuals
Chr2	59811150	59811192	Deletion	Twice sequenced individuals
Chr2	60074369	60074481	Deletion	Twice sequenced individuals
Chr2	60387633	60387673	Deletion	Twice sequenced individuals
Chr2	60394858	60394894	Deletion	Twice sequenced individuals
Chr2	60501129	60501161	Deletion	Twice sequenced individuals
Chr2	60834595	60834724	Deletion	Twice sequenced individuals
Chr2	60887293	60887321	Deletion	Twice sequenced individuals
Chr2	61553825	61553887	Deletion	Twice sequenced individuals
Chr2	61833903	61833942	Deletion	Twice sequenced individuals
Chr2	62125900	62125960	Deletion	Twice sequenced individuals
Chr2	62196072	62196189	Deletion	Twice sequenced individuals
Chr2	62226943	62228450	Deletion	Twice sequenced individuals
Chr2	62384898	62384925	Deletion	Twice sequenced individuals
Chr2	62557519	62557554	Deletion	Twice sequenced individuals
Chr2	62597021	62598618	Deletion	Twice sequenced individuals
Chr2	64951293	64952971	Deletion	Twice sequenced individuals
Chr2	65112624	65113963	Deletion	Twice sequenced individuals
Chr2	65444186	65444219	Deletion	Twice sequenced individuals
Chr2	65447718	65448049	Deletion	Twice sequenced individuals
Chr2	65551947	65552105	Deletion	Twice sequenced individuals
Chr2	66330321	66330350	Deletion	Twice sequenced individuals
Chr2	66492660	66492694	Deletion	Twice sequenced individuals
Chr2	66598159	66598399	Deletion	Twice sequenced individuals
Chr2	67033809	67033992	Deletion	Twice sequenced individuals
Chr2	67056180	67056216	Deletion	Twice sequenced individuals
Chr2	67085476	67085507	Deletion	Twice sequenced individuals
Chr2	67127396	67128472	Deletion	Twice sequenced individuals
Chr2	67373468	67373503	Deletion	Twice sequenced individuals
Chr2	67517625	67517951	Deletion	Twice sequenced individuals
Chr2	67653098	67653134	Deletion	Twice sequenced individuals
Chr2	67849119	67850423	Deletion	Twice sequenced individuals
Chr2	67921660	67921782	Deletion	Twice sequenced individuals
Chr2	68031588	68031614	Deletion	Twice sequenced individuals
Chr2	68234507	68234591	Deletion	Twice sequenced individuals
Chr2	68539615	68540296	Deletion	Twice sequenced individuals
Chr2	69169010	69169382	Deletion	Twice sequenced individuals
Chr2	69547632	69547832	Deletion	Twice sequenced individuals
Chr2	70037181	70037221	Deletion	Twice sequenced individuals
Chr2	70220633	70221241	Deletion	Twice sequenced individuals
Chr2	70536759	70537142	Deletion	Twice sequenced individuals
Chr2	70552281	70552363	Deletion	Twice sequenced individuals
Chr2	70634599	70634652	Deletion	Twice sequenced individuals
Chr2	70763889	70764144	Deletion	Twice sequenced individuals
Chr2	71860946	71860981	Deletion	Twice sequenced individuals
Chr2	72130219	72130265	Deletion	Twice sequenced individuals
Chr2	72572558	72573361	Deletion	Twice sequenced individuals
Chr2	73260370	73260471	Deletion	Twice sequenced individuals
Chr2	73921153	73921527	Deletion	Twice sequenced individuals
Chr2	73933721	73936619	Deletion	Twice sequenced individuals
Chr2	73954100	73954140	Deletion	Twice sequenced individuals
Chr2	74115799	74116027	Deletion	Twice sequenced individuals
Chr2	74253131	74253774	Deletion	Twice sequenced individuals
Chr2	74268274	74269244	Deletion	Twice sequenced individuals
Chr2	74474007	74475899	Deletion	Twice sequenced individuals
Chr2	74566607	74566672	Deletion	Twice sequenced individuals
Chr2	75062572	75062672	Deletion	Twice sequenced individuals
Chr2	75067216	75067287	Deletion	Twice sequenced individuals
Chr2	75419445	75419580	Deletion	Twice sequenced individuals
Chr2	75740375	75740419	Deletion	Twice sequenced individuals
Chr2	75775157	75776461	Deletion	Twice sequenced individuals
Chr2	75781817	75785186	Deletion	Twice sequenced individuals
Chr2	75946302	75946598	Deletion	Twice sequenced individuals
Chr2	76133228	76133263	Deletion	Twice sequenced individuals
Chr2	76275002	76275830	Deletion	Twice sequenced individuals
Chr2	76392521	76392737	Deletion	Twice sequenced individuals
Chr2	76814915	76815129	Deletion	Twice sequenced individuals
Chr2	76850376	76850495	Deletion	Twice sequenced individuals
Chr2	77346922	77347039	Deletion	Twice sequenced individuals
Chr2	77653181	77653307	Deletion	Twice sequenced individuals
Chr2	78111679	78111757	Deletion	Twice sequenced individuals
Chr2	78241398	78241433	Deletion	Twice sequenced individuals
Chr2	78283456	78283637	Deletion	Twice sequenced individuals
Chr2	78374302	78374336	Deletion	Twice sequenced individuals
Chr2	78716946	78717399	Deletion	Twice sequenced individuals
Chr2	78815969	78817645	Deletion	Twice sequenced individuals
Chr2	78832236	78832267	Deletion	Twice sequenced individuals
Chr2	78953561	78955065	Deletion	Twice sequenced individuals
Chr2	78957526	78959005	Deletion	Twice sequenced individuals
Chr2	78959068	78959174	Deletion	Twice sequenced individuals
Chr2	78959362	78959595	Deletion	Twice sequenced individuals
Chr2	79184894	79186063	Deletion	Twice sequenced individuals
Chr2	79226122	79226261	Deletion	Twice sequenced individuals
Chr2	79342612	79344186	Deletion	Twice sequenced individuals
Chr2	80075510	80075545	Deletion	Twice sequenced individuals
Chr2	80157967	80158009	Deletion	Twice sequenced individuals
Chr2	80338085	80338346	Deletion	Twice sequenced individuals
Chr2	80790802	80791839	Deletion	Twice sequenced individuals
Chr2	80848449	80848491	Deletion	Twice sequenced individuals
Chr2	81000194	81000219	Deletion	Twice sequenced individuals
Chr2	81051161	81051372	Deletion	Twice sequenced individuals
Chr2	81487835	81488102	Deletion	Twice sequenced individuals
Chr2	81740574	81740698	Deletion	Twice sequenced individuals
Chr2	81896467	81897168	Deletion	Twice sequenced individuals
Chr2	82255207	82258298	Deletion	Twice sequenced individuals
Chr2	82568640	82568778	Deletion	Twice sequenced individuals
Chr2	82657038	82659428	Deletion	Twice sequenced individuals
Chr2	82665201	82665721	Deletion	Twice sequenced individuals
Chr2	83102721	83104329	Deletion	Twice sequenced individuals
Chr2	83232016	83232149	Deletion	Twice sequenced individuals
Chr2	83569098	83569877	Deletion	Twice sequenced individuals
Chr2	83889885	83890042	Deletion	Twice sequenced individuals
Chr2	84082165	84082374	Deletion	Twice sequenced individuals
Chr2	84165341	84165385	Deletion	Twice sequenced individuals
Chr2	84327465	84327833	Deletion	Twice sequenced individuals
Chr2	84797948	84798002	Deletion	Twice sequenced individuals
Chr2	85156485	85156628	Deletion	Twice sequenced individuals
Chr2	85366172	85366233	Deletion	Twice sequenced individuals
Chr2	85470089	85470140	Deletion	Twice sequenced individuals
Chr2	85541631	85542163	Deletion	Twice sequenced individuals
Chr2	86202679	86202760	Deletion	Twice sequenced individuals
Chr2	86563482	86563522	Deletion	Twice sequenced individuals
Chr2	86838344	86838410	Deletion	Twice sequenced individuals
Chr2	87172976	87175820	Deletion	Twice sequenced individuals
Chr2	87189035	87189330	Deletion	Twice sequenced individuals
Chr2	87590859	87591008	Deletion	Twice sequenced individuals
Chr2	87842653	87842696	Deletion	Twice sequenced individuals
Chr2	88039173	88040345	Deletion	Twice sequenced individuals
Chr2	88163570	88163611	Deletion	Twice sequenced individuals
Chr2	88369509	88369835	Deletion	Twice sequenced individuals
Chr2	89166272	89166785	Deletion	Twice sequenced individuals
Chr2	89738914	89738966	Deletion	Twice sequenced individuals
Chr2	89760110	89760413	Deletion	Twice sequenced individuals
Chr2	89767838	89768747	Deletion	Twice sequenced individuals
Chr2	90534308	90534501	Deletion	Twice sequenced individuals
Chr2	90602883	90603522	Deletion	Twice sequenced individuals
Chr2	90888995	90889034	Deletion	Twice sequenced individuals
Chr2	90895733	90896337	Deletion	Twice sequenced individuals
Chr2	91300424	91301578	Deletion	Twice sequenced individuals
Chr2	91440368	91440586	Deletion	Twice sequenced individuals
Chr2	92239232	92239264	Deletion	Twice sequenced individuals
Chr2	92316911	92316962	Deletion	Twice sequenced individuals
Chr2	92393477	92394573	Deletion	Twice sequenced individuals
Chr2	92865431	92865994	Deletion	Twice sequenced individuals
Chr2	92993495	92995721	Deletion	Twice sequenced individuals
Chr2	93665994	93672417	Deletion	Twice sequenced individuals
Chr2	93770700	93771634	Deletion	Twice sequenced individuals
Chr2	93773791	93774021	Deletion	Twice sequenced individuals
Chr2	93793805	93794138	Deletion	Twice sequenced individuals
Chr2	93944292	93944328	Deletion	Twice sequenced individuals
Chr2	93979419	93979482	Deletion	Twice sequenced individuals
Chr2	94693939	94695267	Deletion	Twice sequenced individuals
Chr2	94927880	94927916	Deletion	Twice sequenced individuals
Chr2	95055328	95055378	Deletion	Twice sequenced individuals
Chr2	95073140	95073352	Deletion	Twice sequenced individuals
Chr2	95233260	95233341	Deletion	Twice sequenced individuals
Chr2	95325258	95325301	Deletion	Twice sequenced individuals
Chr2	95371169	95371233	Deletion	Twice sequenced individuals
Chr2	95374340	95374688	Deletion	Twice sequenced individuals
Chr2	95529319	95529357	Deletion	Twice sequenced individuals
Chr2	96085295	96085390	Deletion	Twice sequenced individuals
Chr2	96261303	96261873	Deletion	Twice sequenced individuals
Chr2	96878976	96879026	Deletion	Twice sequenced individuals
Chr2	96949379	96949409	Deletion	Twice sequenced individuals
Chr2	97708806	97709493	Deletion	Twice sequenced individuals
Chr2	98393105	98393446	Deletion	Twice sequenced individuals
Chr2	98668083	98668323	Deletion	Twice sequenced individuals
Chr2	98678221	98678259	Deletion	Twice sequenced individuals
Chr2	98936527	98936570	Deletion	Twice sequenced individuals
Chr2	99097968	99098056	Deletion	Twice sequenced individuals
Chr2	99487217	99487251	Deletion	Twice sequenced individuals
Chr2	100192473	100192630	Deletion	Twice sequenced individuals
Chr2	100385235	100385434	Deletion	Twice sequenced individuals
Chr2	100498377	100498699	Deletion	Twice sequenced individuals
Chr2	100769564	100771270	Deletion	Twice sequenced individuals
Chr2	100954806	100954846	Deletion	Twice sequenced individuals
Chr2	101042538	101044685	Deletion	Twice sequenced individuals
Chr2	101374573	101376230	Deletion	Twice sequenced individuals
Chr2	101388855	101388894	Deletion	Twice sequenced individuals
Chr2	101809579	101809702	Deletion	Twice sequenced individuals
Chr2	101836298	101836894	Deletion	Twice sequenced individuals
Chr2	102411747	102411936	Deletion	Twice sequenced individuals
Chr2	102964455	102964756	Deletion	Twice sequenced individuals
Chr2	103238561	103242286	Deletion	Twice sequenced individuals
Chr2	103331982	103332072	Deletion	Twice sequenced individuals
Chr2	103383538	103383582	Deletion	Twice sequenced individuals
Chr2	103582854	103582995	Deletion	Twice sequenced individuals
Chr2	103807410	103807453	Deletion	Twice sequenced individuals
Chr2	103882679	103882735	Deletion	Twice sequenced individuals
Chr2	104214954	104215007	Deletion	Twice sequenced individuals
Chr2	104388075	104388111	Deletion	Twice sequenced individuals
Chr2	104546689	104546739	Deletion	Twice sequenced individuals
Chr2	105706730	105707099	Deletion	Twice sequenced individuals
Chr2	105730979	105731013	Deletion	Twice sequenced individuals
Chr2	105842885	105843100	Deletion	Twice sequenced individuals
Chr2	105857664	105858930	Deletion	Twice sequenced individuals
Chr2	106234869	106234926	Deletion	Twice sequenced individuals
Chr2	106682734	106682759	Deletion	Twice sequenced individuals
Chr2	107072076	107072115	Deletion	Twice sequenced individuals
Chr2	107424217	107424391	Deletion	Twice sequenced individuals
Chr2	107944354	107944391	Deletion	Twice sequenced individuals
Chr2	108267372	108267407	Deletion	Twice sequenced individuals
Chr2	108387102	108387150	Deletion	Twice sequenced individuals
Chr2	108663333	108663393	Deletion	Twice sequenced individuals
Chr2	108718109	108718577	Deletion	Twice sequenced individuals
Chr2	109400013	109400142	Deletion	Twice sequenced individuals
Chr2	109551585	109551830	Deletion	Twice sequenced individuals
Chr2	109741760	109742650	Deletion	Twice sequenced individuals
Chr2	109969623	109970717	Deletion	Twice sequenced individuals
Chr2	109976262	109976289	Deletion	Twice sequenced individuals
Chr2	110234853	110234900	Deletion	Twice sequenced individuals
Chr2	110482037	110482071	Deletion	Twice sequenced individuals
Chr2	110745272	110746576	Deletion	Twice sequenced individuals
Chr2	111180596	111180636	Deletion	Twice sequenced individuals
Chr2	111195300	111195370	Deletion	Twice sequenced individuals
Chr2	111301464	111301536	Deletion	Twice sequenced individuals
Chr2	111418935	111419481	Deletion	Twice sequenced individuals
Chr2	111506388	111506423	Deletion	Twice sequenced individuals
Chr2	112002317	112002503	Deletion	Twice sequenced individuals
Chr2	112109359	112109999	Deletion	Twice sequenced individuals
Chr2	112296609	112296701	Deletion	Twice sequenced individuals
Chr2	112338025	112338084	Deletion	Twice sequenced individuals
Chr2	112338160	112338198	Deletion	Twice sequenced individuals
Chr2	112385747	112385907	Deletion	Twice sequenced individuals
Chr2	112600183	112600216	Deletion	Twice sequenced individuals
Chr2	112837246	112837278	Deletion	Twice sequenced individuals
Chr2	112849311	112849349	Deletion	Twice sequenced individuals
Chr2	113136999	113137142	Deletion	Twice sequenced individuals
Chr2	113662881	113662908	Deletion	Twice sequenced individuals
Chr2	113819057	113819082	Deletion	Twice sequenced individuals
Chr2	113915451	113915481	Deletion	Twice sequenced individuals
Chr2	114030672	114030706	Deletion	Twice sequenced individuals
Chr2	114303877	114304247	Deletion	Twice sequenced individuals
Chr2	114356873	114356912	Deletion	Twice sequenced individuals
Chr2	114368331	114368787	Deletion	Twice sequenced individuals
Chr2	114370129	114370181	Deletion	Twice sequenced individuals
Chr2	115152579	115155154	Deletion	Twice sequenced individuals
Chr2	116096189	116096271	Deletion	Twice sequenced individuals
Chr2	116131502	116131531	Deletion	Twice sequenced individuals
Chr2	116618116	116618144	Deletion	Twice sequenced individuals
Chr2	116722153	116722902	Deletion	Twice sequenced individuals
Chr2	116957551	116957588	Deletion	Twice sequenced individuals
Chr2	117188369	117188780	Deletion	Twice sequenced individuals
Chr2	117214723	117216240	Deletion	Twice sequenced individuals
Chr2	117695501	117695536	Deletion	Twice sequenced individuals
Chr2	117801022	117801074	Deletion	Twice sequenced individuals
Chr2	118070957	118073280	Deletion	Twice sequenced individuals
Chr2	118246634	118246661	Deletion	Twice sequenced individuals
Chr2	118596179	118598013	Deletion	Twice sequenced individuals
Chr2	119279677	119280096	Deletion	Twice sequenced individuals
Chr2	119357682	119357717	Deletion	Twice sequenced individuals
Chr2	119482472	119483200	Deletion	Twice sequenced individuals
Chr2	119540252	119540553	Deletion	Twice sequenced individuals
Chr2	119836094	119836142	Deletion	Twice sequenced individuals
Chr2	119921666	119921735	Deletion	Twice sequenced individuals
Chr2	120234074	120234109	Deletion	Twice sequenced individuals
Chr2	120657198	120657237	Deletion	Twice sequenced individuals
Chr2	120831907	120833108	Deletion	Twice sequenced individuals
Chr2	121083289	121084578	Deletion	Twice sequenced individuals
Chr2	122471274	122471320	Deletion	Twice sequenced individuals
Chr2	122721413	122721466	Deletion	Twice sequenced individuals
Chr2	123439971	123440370	Deletion	Twice sequenced individuals
Chr2	123794334	123794382	Deletion	Twice sequenced individuals
Chr2	123865550	123865578	Deletion	Twice sequenced individuals
Chr2	124016448	124016477	Deletion	Twice sequenced individuals
Chr2	124554574	124554599	Deletion	Twice sequenced individuals
Chr2	124562543	124563682	Deletion	Twice sequenced individuals
Chr2	124728798	124728832	Deletion	Twice sequenced individuals
Chr2	125917034	125917159	Deletion	Twice sequenced individuals
Chr2	126041648	126042992	Deletion	Twice sequenced individuals
Chr2	126342217	126342246	Deletion	Twice sequenced individuals
Chr2	126357463	126357739	Deletion	Twice sequenced individuals
Chr2	126642412	126642525	Deletion	Twice sequenced individuals
Chr2	126644407	126644436	Deletion	Twice sequenced individuals
Chr2	127679384	127679518	Deletion	Twice sequenced individuals
Chr2	127794200	127794243	Deletion	Twice sequenced individuals
Chr2	128027624	128027964	Deletion	Twice sequenced individuals
Chr2	128373774	128373810	Deletion	Twice sequenced individuals
Chr2	128375969	128375994	Deletion	Twice sequenced individuals
Chr2	128377974	128378117	Deletion	Twice sequenced individuals
Chr2	129976991	129977036	Deletion	Twice sequenced individuals
Chr2	130421215	130421269	Deletion	Twice sequenced individuals
Chr2	130479492	130481168	Deletion	Twice sequenced individuals
Chr2	130622186	130623231	Deletion	Twice sequenced individuals
Chr2	130895210	130895291	Deletion	Twice sequenced individuals
Chr2	131031723	131032179	Deletion	Twice sequenced individuals
Chr2	131330175	131330241	Deletion	Twice sequenced individuals
Chr2	131459256	131459331	Deletion	Twice sequenced individuals
Chr2	131999381	131999430	Deletion	Twice sequenced individuals
Chr2	132193844	132193872	Deletion	Twice sequenced individuals
Chr2	132591069	132591102	Deletion	Twice sequenced individuals
Chr2	133030709	133030751	Deletion	Twice sequenced individuals
Chr2	133120483	133120511	Deletion	Twice sequenced individuals
Chr2	133166742	133166791	Deletion	Twice sequenced individuals
Chr2	133456208	133456889	Deletion	Twice sequenced individuals
Chr2	133465242	133465345	Deletion	Twice sequenced individuals
Chr2	133505044	133505187	Deletion	Twice sequenced individuals
Chr2	133971448	133971475	Deletion	Twice sequenced individuals
Chr2	134010231	134010300	Deletion	Twice sequenced individuals
Chr2	134499996	134500033	Deletion	Twice sequenced individuals
Chr2	134682519	134682559	Deletion	Twice sequenced individuals
Chr2	134828499	134828555	Deletion	Twice sequenced individuals
Chr2	134942804	134942888	Deletion	Twice sequenced individuals
Chr2	134972426	134972458	Deletion	Twice sequenced individuals
Chr2	134982844	134982902	Deletion	Twice sequenced individuals
Chr2	135085039	135085081	Deletion	Twice sequenced individuals
Chr2	135185848	135185890	Deletion	Twice sequenced individuals
Chr2	135589191	135589248	Deletion	Twice sequenced individuals
Chr2	135662001	135662211	Deletion	Twice sequenced individuals
Chr2	135955829	135956062	Deletion	Twice sequenced individuals
Chr2	136080878	136080936	Deletion	Twice sequenced individuals
Chr2	136088356	136088790	Deletion	Twice sequenced individuals
Chr2	136278322	136278531	Deletion	Twice sequenced individuals
Chr2	136380681	136380736	Deletion	Twice sequenced individuals
Chr2	136402750	136402784	Deletion	Twice sequenced individuals
Chr3	138929	138965	Deletion	Twice sequenced individuals
Chr3	148802	148895	Deletion	Twice sequenced individuals
Chr3	209507	209551	Deletion	Twice sequenced individuals
Chr3	658630	658696	Deletion	Twice sequenced individuals
Chr3	760126	760189	Deletion	Twice sequenced individuals
Chr3	964196	964222	Deletion	Twice sequenced individuals
Chr3	1046629	1047254	Deletion	Twice sequenced individuals
Chr3	1053297	1053334	Deletion	Twice sequenced individuals
Chr3	1212293	1212524	Deletion	Twice sequenced individuals
Chr3	1628728	1628773	Deletion	Twice sequenced individuals
Chr3	1825053	1825780	Deletion	Twice sequenced individuals
Chr3	2144226	2144264	Deletion	Twice sequenced individuals
Chr3	2497074	2497558	Deletion	Twice sequenced individuals
Chr3	2576371	2576978	Deletion	Twice sequenced individuals
Chr3	2595570	2595627	Deletion	Twice sequenced individuals
Chr3	2676810	2677062	Deletion	Twice sequenced individuals
Chr3	2781204	2781237	Deletion	Twice sequenced individuals
Chr3	2962639	2963582	Deletion	Twice sequenced individuals
Chr3	2973545	2974096	Deletion	Twice sequenced individuals
Chr3	3170838	3170904	Deletion	Twice sequenced individuals
Chr3	3795872	3796311	Deletion	Twice sequenced individuals
Chr3	3917165	3917241	Deletion	Twice sequenced individuals
Chr3	4016259	4016595	Deletion	Twice sequenced individuals
Chr3	4231606	4231723	Deletion	Twice sequenced individuals
Chr3	4430650	4432000	Deletion	Twice sequenced individuals
Chr3	4578166	4578292	Deletion	Twice sequenced individuals
Chr3	4717996	4718026	Deletion	Twice sequenced individuals
Chr3	5062650	5062718	Deletion	Twice sequenced individuals
Chr3	5088274	5088341	Deletion	Twice sequenced individuals
Chr3	5162241	5165422	Deletion	Twice sequenced individuals
Chr3	5182329	5182420	Deletion	Twice sequenced individuals
Chr3	5248545	5248574	Deletion	Twice sequenced individuals
Chr3	5329893	5329971	Deletion	Twice sequenced individuals
Chr3	5439884	5439924	Deletion	Twice sequenced individuals
Chr3	5454646	5455247	Deletion	Twice sequenced individuals
Chr3	5481624	5481664	Deletion	Twice sequenced individuals
Chr3	5552823	5552978	Deletion	Twice sequenced individuals
Chr3	5652230	5653082	Deletion	Twice sequenced individuals
Chr3	5798076	5798110	Deletion	Twice sequenced individuals
Chr3	5831401	5831453	Deletion	Twice sequenced individuals
Chr3	6037801	6037833	Deletion	Twice sequenced individuals
Chr3	6087880	6089764	Deletion	Twice sequenced individuals
Chr3	6555467	6556746	Deletion	Twice sequenced individuals
Chr3	6724758	6725329	Deletion	Twice sequenced individuals
Chr3	6773441	6773492	Deletion	Twice sequenced individuals
Chr3	6806222	6806628	Deletion	Twice sequenced individuals
Chr3	6891418	6891490	Deletion	Twice sequenced individuals
Chr3	7102720	7102751	Deletion	Twice sequenced individuals
Chr3	7140760	7141123	Deletion	Twice sequenced individuals
Chr3	7268749	7269831	Deletion	Twice sequenced individuals
Chr3	7338683	7338726	Deletion	Twice sequenced individuals
Chr3	7370286	7370331	Deletion	Twice sequenced individuals
Chr3	7861360	7862658	Deletion	Twice sequenced individuals
Chr3	7979983	7980981	Deletion	Twice sequenced individuals
Chr3	8307933	8307958	Deletion	Twice sequenced individuals
Chr3	8489228	8489259	Deletion	Twice sequenced individuals
Chr3	8699606	8699644	Deletion	Twice sequenced individuals
Chr3	8709184	8709213	Deletion	Twice sequenced individuals
Chr3	9008236	9009499	Deletion	Twice sequenced individuals
Chr3	9238654	9239289	Deletion	Twice sequenced individuals
Chr3	9957474	9957499	Deletion	Twice sequenced individuals
Chr3	10007073	10007238	Deletion	Twice sequenced individuals
Chr3	10079488	10080098	Deletion	Twice sequenced individuals
Chr3	10171253	10171639	Deletion	Twice sequenced individuals
Chr3	10339855	10340109	Deletion	Twice sequenced individuals
Chr3	10421156	10421207	Deletion	Twice sequenced individuals
Chr3	10451000	10451061	Deletion	Twice sequenced individuals
Chr3	10462655	10462989	Deletion	Twice sequenced individuals
Chr3	10497033	10497148	Deletion	Twice sequenced individuals
Chr3	10877003	10877269	Deletion	Twice sequenced individuals
Chr3	11074591	11074627	Deletion	Twice sequenced individuals
Chr3	11218422	11224424	Deletion	Twice sequenced individuals
Chr3	11262109	11262155	Deletion	Twice sequenced individuals
Chr3	11287938	11288216	Deletion	Twice sequenced individuals
Chr3	11517184	11520515	Deletion	Twice sequenced individuals
Chr3	11568306	11568496	Deletion	Twice sequenced individuals
Chr3	11721440	11721505	Deletion	Twice sequenced individuals
Chr3	11749641	11750932	Deletion	Twice sequenced individuals
Chr3	11804955	11805639	Deletion	Twice sequenced individuals
Chr3	11930477	11930505	Deletion	Twice sequenced individuals
Chr3	11932198	11934952	Deletion	Twice sequenced individuals
Chr3	11942432	11943513	Deletion	Twice sequenced individuals
Chr3	11985952	11986061	Deletion	Twice sequenced individuals
Chr3	11995009	11995053	Deletion	Twice sequenced individuals
Chr3	12528261	12528321	Deletion	Twice sequenced individuals
Chr3	12583369	12583415	Deletion	Twice sequenced individuals
Chr3	12881258	12881286	Deletion	Twice sequenced individuals
Chr3	12918409	12918868	Deletion	Twice sequenced individuals
Chr3	12992881	12993950	Deletion	Twice sequenced individuals
Chr3	13222365	13222407	Deletion	Twice sequenced individuals
Chr3	13225244	13225318	Deletion	Twice sequenced individuals
Chr3	13226029	13226272	Deletion	Twice sequenced individuals
Chr3	13352150	13352608	Deletion	Twice sequenced individuals
Chr3	13362663	13363375	Deletion	Twice sequenced individuals
Chr3	13370772	13371048	Deletion	Twice sequenced individuals
Chr3	13571820	13572554	Deletion	Twice sequenced individuals
Chr3	13595253	13595285	Deletion	Twice sequenced individuals
Chr3	14262024	14263097	Deletion	Twice sequenced individuals
Chr3	14676933	14676974	Deletion	Twice sequenced individuals
Chr3	14944142	14944176	Deletion	Twice sequenced individuals
Chr3	15092544	15092576	Deletion	Twice sequenced individuals
Chr3	15185307	15185388	Deletion	Twice sequenced individuals
Chr3	15335906	15335937	Deletion	Twice sequenced individuals
Chr3	15386180	15386214	Deletion	Twice sequenced individuals
Chr3	15449029	15450037	Deletion	Twice sequenced individuals
Chr3	15677925	15678144	Deletion	Twice sequenced individuals
Chr3	15805086	15805159	Deletion	Twice sequenced individuals
Chr3	15861360	15861402	Deletion	Twice sequenced individuals
Chr3	16108048	16108115	Deletion	Twice sequenced individuals
Chr3	17315315	17316684	Deletion	Twice sequenced individuals
Chr3	17894996	17895027	Deletion	Twice sequenced individuals
Chr3	18001483	18002426	Deletion	Twice sequenced individuals
Chr3	18020251	18021112	Deletion	Twice sequenced individuals
Chr3	18187221	18189973	Deletion	Twice sequenced individuals
Chr3	18288277	18290500	Deletion	Twice sequenced individuals
Chr3	18416167	18417389	Deletion	Twice sequenced individuals
Chr3	18521037	18521069	Deletion	Twice sequenced individuals
Chr3	19237900	19237961	Deletion	Twice sequenced individuals
Chr3	19252824	19253811	Deletion	Twice sequenced individuals
Chr3	19703424	19703458	Deletion	Twice sequenced individuals
Chr3	19734554	19734604	Deletion	Twice sequenced individuals
Chr3	19772988	19773833	Deletion	Twice sequenced individuals
Chr3	19939250	19939288	Deletion	Twice sequenced individuals
Chr3	21301533	21304102	Deletion	Twice sequenced individuals
Chr3	21392497	21407049	Deletion	Twice sequenced individuals
Chr3	21758683	21758881	Deletion	Twice sequenced individuals
Chr3	21762457	21762490	Deletion	Twice sequenced individuals
Chr3	21901951	21901982	Deletion	Twice sequenced individuals
Chr3	22103047	22105426	Deletion	Twice sequenced individuals
Chr3	22277619	22277650	Deletion	Twice sequenced individuals
Chr3	22724695	22724733	Deletion	Twice sequenced individuals
Chr3	22725364	22726483	Deletion	Twice sequenced individuals
Chr3	22797536	22805672	Deletion	Twice sequenced individuals
Chr3	22806358	22806391	Deletion	Twice sequenced individuals
Chr3	22976072	22976126	Deletion	Twice sequenced individuals
Chr3	23106387	23108118	Deletion	Twice sequenced individuals
Chr3	23498873	23500069	Deletion	Twice sequenced individuals
Chr3	24141855	24142458	Deletion	Twice sequenced individuals
Chr3	24612495	24612691	Deletion	Twice sequenced individuals
Chr3	24707735	24707798	Deletion	Twice sequenced individuals
Chr3	24742291	24742907	Deletion	Twice sequenced individuals
Chr3	24767343	24767529	Deletion	Twice sequenced individuals
Chr3	24865359	24865502	Deletion	Twice sequenced individuals
Chr3	24983979	24984073	Deletion	Twice sequenced individuals
Chr3	25077124	25077176	Deletion	Twice sequenced individuals
Chr3	25082925	25082963	Deletion	Twice sequenced individuals
Chr3	25546944	25549271	Deletion	Twice sequenced individuals
Chr3	25868920	25868961	Deletion	Twice sequenced individuals
Chr3	26473535	26474648	Deletion	Twice sequenced individuals
Chr3	26710823	26711221	Deletion	Twice sequenced individuals
Chr3	26906227	26906277	Deletion	Twice sequenced individuals
Chr3	26970345	26970374	Deletion	Twice sequenced individuals
Chr3	27440984	27441020	Deletion	Twice sequenced individuals
Chr3	27620331	27620366	Deletion	Twice sequenced individuals
Chr3	27622204	27622350	Deletion	Twice sequenced individuals
Chr3	27641880	27641922	Deletion	Twice sequenced individuals
Chr3	27654108	27654137	Deletion	Twice sequenced individuals
Chr3	27705093	27705120	Deletion	Twice sequenced individuals
Chr3	27864888	27864917	Deletion	Twice sequenced individuals
Chr3	28024583	28024630	Deletion	Twice sequenced individuals
Chr3	28656132	28658132	Deletion	Twice sequenced individuals
Chr3	29076652	29076696	Deletion	Twice sequenced individuals
Chr3	29130888	29130918	Deletion	Twice sequenced individuals
Chr3	29413572	29414241	Deletion	Twice sequenced individuals
Chr3	29535130	29535157	Deletion	Twice sequenced individuals
Chr3	29659043	29659082	Deletion	Twice sequenced individuals
Chr3	30403857	30403890	Deletion	Twice sequenced individuals
Chr3	30785356	30785625	Deletion	Twice sequenced individuals
Chr3	30993410	30994659	Deletion	Twice sequenced individuals
Chr3	31213988	31214940	Deletion	Twice sequenced individuals
Chr3	31399408	31399628	Deletion	Twice sequenced individuals
Chr3	31823793	31825033	Deletion	Twice sequenced individuals
Chr3	31922723	31923403	Deletion	Twice sequenced individuals
Chr3	31932198	31933005	Deletion	Twice sequenced individuals
Chr3	32054411	32054439	Deletion	Twice sequenced individuals
Chr3	32385670	32385699	Deletion	Twice sequenced individuals
Chr3	32453949	32453991	Deletion	Twice sequenced individuals
Chr3	33219600	33219625	Deletion	Twice sequenced individuals
Chr3	33428960	33430205	Deletion	Twice sequenced individuals
Chr3	33768653	33768685	Deletion	Twice sequenced individuals
Chr3	34380655	34380763	Deletion	Twice sequenced individuals
Chr3	34403628	34403676	Deletion	Twice sequenced individuals
Chr3	34764116	34764148	Deletion	Twice sequenced individuals
Chr3	35183105	35183181	Deletion	Twice sequenced individuals
Chr3	35687828	35688974	Deletion	Twice sequenced individuals
Chr3	36099418	36099940	Deletion	Twice sequenced individuals
Chr3	36277638	36277684	Deletion	Twice sequenced individuals
Chr3	36402661	36402693	Deletion	Twice sequenced individuals
Chr3	36475186	36482287	Deletion	Twice sequenced individuals
Chr3	36935211	36937649	Deletion	Twice sequenced individuals
Chr3	37260623	37260664	Deletion	Twice sequenced individuals
Chr3	37315543	37316058	Deletion	Twice sequenced individuals
Chr3	37323544	37323573	Deletion	Twice sequenced individuals
Chr3	37448163	37448189	Deletion	Twice sequenced individuals
Chr3	37574329	37574363	Deletion	Twice sequenced individuals
Chr3	37595124	37595320	Deletion	Twice sequenced individuals
Chr3	37648547	37648627	Deletion	Twice sequenced individuals
Chr3	37718606	37718969	Deletion	Twice sequenced individuals
Chr3	37737462	37738082	Deletion	Twice sequenced individuals
Chr3	38195124	38195177	Deletion	Twice sequenced individuals
Chr3	38349773	38349926	Deletion	Twice sequenced individuals
Chr3	38521647	38521789	Deletion	Twice sequenced individuals
Chr3	38945565	38946802	Deletion	Twice sequenced individuals
Chr3	38969047	38969132	Deletion	Twice sequenced individuals
Chr3	39179154	39180139	Deletion	Twice sequenced individuals
Chr3	39211673	39212206	Deletion	Twice sequenced individuals
Chr3	39245970	39246041	Deletion	Twice sequenced individuals
Chr3	39347184	39349037	Deletion	Twice sequenced individuals
Chr3	39418279	39418393	Deletion	Twice sequenced individuals
Chr3	39904008	39905304	Deletion	Twice sequenced individuals
Chr3	39913887	39915445	Deletion	Twice sequenced individuals
Chr3	39916841	39916899	Deletion	Twice sequenced individuals
Chr3	39923165	39923378	Deletion	Twice sequenced individuals
Chr3	40201979	40202031	Deletion	Twice sequenced individuals
Chr3	40394872	40394916	Deletion	Twice sequenced individuals
Chr3	40683122	40683262	Deletion	Twice sequenced individuals
Chr3	40748319	40748747	Deletion	Twice sequenced individuals
Chr3	40909790	40909827	Deletion	Twice sequenced individuals
Chr3	40999276	40999352	Deletion	Twice sequenced individuals
Chr3	41199296	41199612	Deletion	Twice sequenced individuals
Chr3	41315849	41315891	Deletion	Twice sequenced individuals
Chr3	41434582	41435364	Deletion	Twice sequenced individuals
Chr3	41650190	41650731	Deletion	Twice sequenced individuals
Chr3	41910113	41910291	Deletion	Twice sequenced individuals
Chr3	42083887	42085166	Deletion	Twice sequenced individuals
Chr3	42122826	42125727	Deletion	Twice sequenced individuals
Chr3	42411088	42411194	Deletion	Twice sequenced individuals
Chr3	42468426	42469140	Deletion	Twice sequenced individuals
Chr3	42926150	42926193	Deletion	Twice sequenced individuals
Chr3	42934265	42934305	Deletion	Twice sequenced individuals
Chr3	42970707	42970995	Deletion	Twice sequenced individuals
Chr3	43203395	43203450	Deletion	Twice sequenced individuals
Chr3	43245753	43246324	Deletion	Twice sequenced individuals
Chr3	43375849	43375992	Deletion	Twice sequenced individuals
Chr3	43738906	43738966	Deletion	Twice sequenced individuals
Chr3	43784632	43784695	Deletion	Twice sequenced individuals
Chr3	43935019	43935125	Deletion	Twice sequenced individuals
Chr3	44080344	44080617	Deletion	Twice sequenced individuals
Chr3	44106723	44106758	Deletion	Twice sequenced individuals
Chr3	44164452	44165436	Deletion	Twice sequenced individuals
Chr3	44423763	44423845	Deletion	Twice sequenced individuals
Chr3	44475312	44475355	Deletion	Twice sequenced individuals
Chr3	44754612	44754653	Deletion	Twice sequenced individuals
Chr3	44800153	44800205	Deletion	Twice sequenced individuals
Chr3	44859517	44859832	Deletion	Twice sequenced individuals
Chr3	45225315	45225361	Deletion	Twice sequenced individuals
Chr3	45266358	45266453	Deletion	Twice sequenced individuals
Chr3	45423466	45423511	Deletion	Twice sequenced individuals
Chr3	45738193	45738766	Deletion	Twice sequenced individuals
Chr3	46092086	46092229	Deletion	Twice sequenced individuals
Chr3	46319518	46319711	Deletion	Twice sequenced individuals
Chr3	46529632	46530364	Deletion	Twice sequenced individuals
Chr3	46550544	46550792	Deletion	Twice sequenced individuals
Chr3	46567601	46567652	Deletion	Twice sequenced individuals
Chr3	46801408	46801842	Deletion	Twice sequenced individuals
Chr3	47514931	47514961	Deletion	Twice sequenced individuals
Chr3	47607385	47608224	Deletion	Twice sequenced individuals
Chr3	47794840	47795286	Deletion	Twice sequenced individuals
Chr3	47882446	47883797	Deletion	Twice sequenced individuals
Chr3	48040961	48040990	Deletion	Twice sequenced individuals
Chr3	48260757	48261128	Deletion	Twice sequenced individuals
Chr3	48401509	48401920	Deletion	Twice sequenced individuals
Chr3	48462125	48462165	Deletion	Twice sequenced individuals
Chr3	48533638	48533790	Deletion	Twice sequenced individuals
Chr3	49163164	49163205	Deletion	Twice sequenced individuals
Chr3	49554273	49554303	Deletion	Twice sequenced individuals
Chr3	49690920	49692224	Deletion	Twice sequenced individuals
Chr3	49749746	49749782	Deletion	Twice sequenced individuals
Chr3	49885693	49885729	Deletion	Twice sequenced individuals
Chr3	50820719	50820851	Deletion	Twice sequenced individuals
Chr3	50945971	50946066	Deletion	Twice sequenced individuals
Chr3	51291970	51292006	Deletion	Twice sequenced individuals
Chr3	51496162	51496195	Deletion	Twice sequenced individuals
Chr3	51727011	51728617	Deletion	Twice sequenced individuals
Chr3	51874291	51874434	Deletion	Twice sequenced individuals
Chr3	51874723	51874884	Deletion	Twice sequenced individuals
Chr3	51912968	51913042	Deletion	Twice sequenced individuals
Chr3	51953905	51953946	Deletion	Twice sequenced individuals
Chr3	52946664	52946696	Deletion	Twice sequenced individuals
Chr3	53960304	53960363	Deletion	Twice sequenced individuals
Chr3	54007321	54008024	Deletion	Twice sequenced individuals
Chr3	54065505	54066804	Deletion	Twice sequenced individuals
Chr3	54080705	54080762	Deletion	Twice sequenced individuals
Chr3	54248467	54248523	Deletion	Twice sequenced individuals
Chr3	54254139	54254724	Deletion	Twice sequenced individuals
Chr3	54276238	54276496	Deletion	Twice sequenced individuals
Chr3	54277067	54277441	Deletion	Twice sequenced individuals
Chr3	54610810	54610932	Deletion	Twice sequenced individuals
Chr3	55282516	55283955	Deletion	Twice sequenced individuals
Chr3	55327026	55327539	Deletion	Twice sequenced individuals
Chr3	55632966	55633024	Deletion	Twice sequenced individuals
Chr3	55710745	55710976	Deletion	Twice sequenced individuals
Chr3	55909380	55910558	Deletion	Twice sequenced individuals
Chr3	56302956	56302986	Deletion	Twice sequenced individuals
Chr3	56486281	56486312	Deletion	Twice sequenced individuals
Chr3	56609761	56610464	Deletion	Twice sequenced individuals
Chr3	57186144	57186191	Deletion	Twice sequenced individuals
Chr3	57312690	57312745	Deletion	Twice sequenced individuals
Chr3	57339018	57340021	Deletion	Twice sequenced individuals
Chr3	58217969	58218262	Deletion	Twice sequenced individuals
Chr3	58734182	58734439	Deletion	Twice sequenced individuals
Chr3	58943894	58943935	Deletion	Twice sequenced individuals
Chr3	58996524	58997481	Deletion	Twice sequenced individuals
Chr3	59010644	59010693	Deletion	Twice sequenced individuals
Chr3	59126744	59126770	Deletion	Twice sequenced individuals
Chr3	59515001	59515074	Deletion	Twice sequenced individuals
Chr3	60199101	60199165	Deletion	Twice sequenced individuals
Chr3	60209570	60209641	Deletion	Twice sequenced individuals
Chr3	60221073	60221128	Deletion	Twice sequenced individuals
Chr3	60283865	60283902	Deletion	Twice sequenced individuals
Chr3	60346805	60347496	Deletion	Twice sequenced individuals
Chr3	60432936	60433000	Deletion	Twice sequenced individuals
Chr3	61224760	61224795	Deletion	Twice sequenced individuals
Chr3	61269753	61269785	Deletion	Twice sequenced individuals
Chr3	61276244	61276682	Deletion	Twice sequenced individuals
Chr3	61326989	61327084	Deletion	Twice sequenced individuals
Chr3	61519146	61519202	Deletion	Twice sequenced individuals
Chr3	61644415	61646688	Deletion	Twice sequenced individuals
Chr3	61665237	61665380	Deletion	Twice sequenced individuals
Chr3	61902938	61902981	Deletion	Twice sequenced individuals
Chr3	61921367	61921421	Deletion	Twice sequenced individuals
Chr3	62404332	62405007	Deletion	Twice sequenced individuals
Chr3	62417680	62417961	Deletion	Twice sequenced individuals
Chr3	62819308	62819342	Deletion	Twice sequenced individuals
Chr3	63377067	63377106	Deletion	Twice sequenced individuals
Chr3	63562301	63562341	Deletion	Twice sequenced individuals
Chr3	63639201	63639365	Deletion	Twice sequenced individuals
Chr3	64252552	64253664	Deletion	Twice sequenced individuals
Chr3	64342022	64342081	Deletion	Twice sequenced individuals
Chr3	64351580	64351616	Deletion	Twice sequenced individuals
Chr3	64519427	64519466	Deletion	Twice sequenced individuals
Chr3	64701809	64701898	Deletion	Twice sequenced individuals
Chr3	64798902	64807359	Deletion	Twice sequenced individuals
Chr3	65152930	65152958	Deletion	Twice sequenced individuals
Chr3	65382386	65383283	Deletion	Twice sequenced individuals
Chr3	65400129	65400233	Deletion	Twice sequenced individuals
Chr3	65755383	65755429	Deletion	Twice sequenced individuals
Chr3	66116983	66117571	Deletion	Twice sequenced individuals
Chr3	66522182	66522259	Deletion	Twice sequenced individuals
Chr3	66658650	66658681	Deletion	Twice sequenced individuals
Chr3	66677075	66677218	Deletion	Twice sequenced individuals
Chr3	66749622	66750078	Deletion	Twice sequenced individuals
Chr3	66751304	66751658	Deletion	Twice sequenced individuals
Chr3	66753798	66754275	Deletion	Twice sequenced individuals
Chr3	66841951	66841981	Deletion	Twice sequenced individuals
Chr3	66927522	66927557	Deletion	Twice sequenced individuals
Chr3	67011793	67011826	Deletion	Twice sequenced individuals
Chr3	67547088	67547332	Deletion	Twice sequenced individuals
Chr3	67659763	67659820	Deletion	Twice sequenced individuals
Chr3	67713531	67713584	Deletion	Twice sequenced individuals
Chr3	67804427	67804476	Deletion	Twice sequenced individuals
Chr3	67852694	67852720	Deletion	Twice sequenced individuals
Chr3	68082903	68082932	Deletion	Twice sequenced individuals
Chr3	68619299	68619352	Deletion	Twice sequenced individuals
Chr3	68749769	68750601	Deletion	Twice sequenced individuals
Chr3	69175020	69175296	Deletion	Twice sequenced individuals
Chr3	69472589	69472706	Deletion	Twice sequenced individuals
Chr3	70491268	70491444	Deletion	Twice sequenced individuals
Chr3	70743155	70743336	Deletion	Twice sequenced individuals
Chr3	71036262	71036402	Deletion	Twice sequenced individuals
Chr3	71318975	71319009	Deletion	Twice sequenced individuals
Chr3	72151853	72151947	Deletion	Twice sequenced individuals
Chr3	72210050	72210089	Deletion	Twice sequenced individuals
Chr3	72357448	72357491	Deletion	Twice sequenced individuals
Chr3	72631205	72634154	Deletion	Twice sequenced individuals
Chr3	72666878	72666912	Deletion	Twice sequenced individuals
Chr3	73007926	73008450	Deletion	Twice sequenced individuals
Chr3	73457104	73457362	Deletion	Twice sequenced individuals
Chr3	73698502	73699098	Deletion	Twice sequenced individuals
Chr3	73832177	73834541	Deletion	Twice sequenced individuals
Chr3	74027359	74027401	Deletion	Twice sequenced individuals
Chr3	74709471	74709518	Deletion	Twice sequenced individuals
Chr3	74872337	74872507	Deletion	Twice sequenced individuals
Chr3	75439303	75439774	Deletion	Twice sequenced individuals
Chr3	75444992	75445030	Deletion	Twice sequenced individuals
Chr3	75638500	75638526	Deletion	Twice sequenced individuals
Chr3	75658354	75658476	Deletion	Twice sequenced individuals
Chr3	76188980	76189686	Deletion	Twice sequenced individuals
Chr3	76196241	76198054	Deletion	Twice sequenced individuals
Chr3	78551167	78551209	Deletion	Twice sequenced individuals
Chr3	78816462	78816594	Deletion	Twice sequenced individuals
Chr3	79562625	79562661	Deletion	Twice sequenced individuals
Chr3	80432114	80432158	Deletion	Twice sequenced individuals
Chr3	80737843	80737873	Deletion	Twice sequenced individuals
Chr3	80965242	80965307	Deletion	Twice sequenced individuals
Chr3	80966554	80966678	Deletion	Twice sequenced individuals
Chr3	80966772	80966813	Deletion	Twice sequenced individuals
Chr3	81001383	81001434	Deletion	Twice sequenced individuals
Chr3	81103151	81104805	Deletion	Twice sequenced individuals
Chr3	81302878	81302913	Deletion	Twice sequenced individuals
Chr3	81424391	81424669	Deletion	Twice sequenced individuals
Chr3	82165091	82165213	Deletion	Twice sequenced individuals
Chr3	83093598	83093668	Deletion	Twice sequenced individuals
Chr3	83519109	83519199	Deletion	Twice sequenced individuals
Chr3	84141160	84141625	Deletion	Twice sequenced individuals
Chr3	85801679	85802409	Deletion	Twice sequenced individuals
Chr3	85830367	85832446	Deletion	Twice sequenced individuals
Chr3	86118050	86119093	Deletion	Twice sequenced individuals
Chr3	86610172	86610204	Deletion	Twice sequenced individuals
Chr3	86756934	86758498	Deletion	Twice sequenced individuals
Chr3	86993666	86996152	Deletion	Twice sequenced individuals
Chr3	87088181	87088599	Deletion	Twice sequenced individuals
Chr3	87350236	87350391	Deletion	Twice sequenced individuals
Chr3	87656610	87656640	Deletion	Twice sequenced individuals
Chr3	87992389	87992849	Deletion	Twice sequenced individuals
Chr3	88001407	88001550	Deletion	Twice sequenced individuals
Chr3	88307779	88307840	Deletion	Twice sequenced individuals
Chr3	88755781	88755819	Deletion	Twice sequenced individuals
Chr3	89040617	89040681	Deletion	Twice sequenced individuals
Chr3	89383156	89383203	Deletion	Twice sequenced individuals
Chr3	89500710	89500738	Deletion	Twice sequenced individuals
Chr3	89736412	89736474	Deletion	Twice sequenced individuals
Chr3	89812246	89812367	Deletion	Twice sequenced individuals
Chr3	89846188	89846225	Deletion	Twice sequenced individuals
Chr3	89847849	89847879	Deletion	Twice sequenced individuals
Chr3	89949506	89949558	Deletion	Twice sequenced individuals
Chr3	89991638	89997475	Deletion	Twice sequenced individuals
Chr3	90138593	90138750	Deletion	Twice sequenced individuals
Chr3	90603559	90603599	Deletion	Twice sequenced individuals
Chr3	90614373	90614731	Deletion	Twice sequenced individuals
Chr3	90774513	90775173	Deletion	Twice sequenced individuals
Chr3	90775586	90775630	Deletion	Twice sequenced individuals
Chr3	91109837	91109880	Deletion	Twice sequenced individuals
Chr3	91598836	91600105	Deletion	Twice sequenced individuals
Chr3	91780149	91781068	Deletion	Twice sequenced individuals
Chr3	91961667	91961802	Deletion	Twice sequenced individuals
Chr3	92154992	92155384	Deletion	Twice sequenced individuals
Chr3	93464311	93465037	Deletion	Twice sequenced individuals
Chr3	94057990	94058116	Deletion	Twice sequenced individuals
Chr3	94167170	94167302	Deletion	Twice sequenced individuals
Chr3	94596758	94596792	Deletion	Twice sequenced individuals
Chr3	94920227	94920329	Deletion	Twice sequenced individuals
Chr3	95597309	95597343	Deletion	Twice sequenced individuals
Chr3	95706448	95706683	Deletion	Twice sequenced individuals
Chr3	96010439	96010521	Deletion	Twice sequenced individuals
Chr3	96345875	96345972	Deletion	Twice sequenced individuals
Chr3	96526368	96526478	Deletion	Twice sequenced individuals
Chr3	96651247	96651290	Deletion	Twice sequenced individuals
Chr3	96763943	96763996	Deletion	Twice sequenced individuals
Chr3	97177212	97177985	Deletion	Twice sequenced individuals
Chr3	97235222	97235333	Deletion	Twice sequenced individuals
Chr3	97517232	97517577	Deletion	Twice sequenced individuals
Chr3	97579368	97579396	Deletion	Twice sequenced individuals
Chr3	97644263	97644301	Deletion	Twice sequenced individuals
Chr3	97880654	97880683	Deletion	Twice sequenced individuals
Chr3	97911983	97912393	Deletion	Twice sequenced individuals
Chr3	98369731	98369773	Deletion	Twice sequenced individuals
Chr3	98462913	98462944	Deletion	Twice sequenced individuals
Chr3	98504486	98505777	Deletion	Twice sequenced individuals
Chr3	100303419	100303614	Deletion	Twice sequenced individuals
Chr3	100582960	100583839	Deletion	Twice sequenced individuals
Chr3	100752589	100752638	Deletion	Twice sequenced individuals
Chr3	101122011	101122048	Deletion	Twice sequenced individuals
Chr3	101255621	101255780	Deletion	Twice sequenced individuals
Chr3	101637397	101637433	Deletion	Twice sequenced individuals
Chr3	101686876	101687975	Deletion	Twice sequenced individuals
Chr3	101846081	101846136	Deletion	Twice sequenced individuals
Chr3	101933043	101933107	Deletion	Twice sequenced individuals
Chr3	102142207	102142234	Deletion	Twice sequenced individuals
Chr3	102341721	102341853	Deletion	Twice sequenced individuals
Chr3	102463728	102463804	Deletion	Twice sequenced individuals
Chr3	102508374	102508448	Deletion	Twice sequenced individuals
Chr3	102540319	102540374	Deletion	Twice sequenced individuals
Chr3	104428777	104428814	Deletion	Twice sequenced individuals
Chr3	104464678	104464821	Deletion	Twice sequenced individuals
Chr3	104782602	104783434	Deletion	Twice sequenced individuals
Chr3	106875797	106875834	Deletion	Twice sequenced individuals
Chr3	106959238	106959315	Deletion	Twice sequenced individuals
Chr3	107013347	107013456	Deletion	Twice sequenced individuals
Chr3	107015246	107015281	Deletion	Twice sequenced individuals
Chr3	107151055	107151101	Deletion	Twice sequenced individuals
Chr3	107680740	107680767	Deletion	Twice sequenced individuals
Chr3	108291838	108291919	Deletion	Twice sequenced individuals
Chr3	108391293	108392085	Deletion	Twice sequenced individuals
Chr3	108744022	108744048	Deletion	Twice sequenced individuals
Chr3	108920484	108920596	Deletion	Twice sequenced individuals
Chr3	109170820	109170846	Deletion	Twice sequenced individuals
Chr3	109249571	109249649	Deletion	Twice sequenced individuals
Chr3	109466429	109466471	Deletion	Twice sequenced individuals
Chr3	109670938	109670982	Deletion	Twice sequenced individuals
Chr3	109786413	109787817	Deletion	Twice sequenced individuals
Chr3	109869703	109869839	Deletion	Twice sequenced individuals
Chr3	110142790	110142931	Deletion	Twice sequenced individuals
Chr3	110845405	110845441	Deletion	Twice sequenced individuals
Chr3	111545404	111545477	Deletion	Twice sequenced individuals
Chr3	111719879	111719922	Deletion	Twice sequenced individuals
Chr3	111746308	111748216	Deletion	Twice sequenced individuals
Chr3	111776194	111776311	Deletion	Twice sequenced individuals
Chr3	111879022	111879050	Deletion	Twice sequenced individuals
Chr3	111998525	111999721	Deletion	Twice sequenced individuals
Chr3	112253187	112253216	Deletion	Twice sequenced individuals
Chr3	112274529	112274556	Deletion	Twice sequenced individuals
Chr3	112521099	112521168	Deletion	Twice sequenced individuals
Chr3	112630210	112630256	Deletion	Twice sequenced individuals
Chr3	112660989	112661049	Deletion	Twice sequenced individuals
Chr3	112870917	112870977	Deletion	Twice sequenced individuals
Chr3	113247513	113247610	Deletion	Twice sequenced individuals
Chr3	113396705	113396744	Deletion	Twice sequenced individuals
Chr3	113797750	113797783	Deletion	Twice sequenced individuals
Chr3	114173897	114174315	Deletion	Twice sequenced individuals
Chr3	114427199	114427282	Deletion	Twice sequenced individuals
Chr3	114808353	114808706	Deletion	Twice sequenced individuals
Chr3	114981330	114981431	Deletion	Twice sequenced individuals
Chr3	115302675	115302721	Deletion	Twice sequenced individuals
Chr3	115326753	115331938	Deletion	Twice sequenced individuals
Chr3	115360118	115360173	Deletion	Twice sequenced individuals
Chr3	115412738	115412799	Deletion	Twice sequenced individuals
Chr3	116723335	116723372	Deletion	Twice sequenced individuals
Chr3	116936559	116936594	Deletion	Twice sequenced individuals
Chr3	117016469	117016791	Deletion	Twice sequenced individuals
Chr3	117032825	117032895	Deletion	Twice sequenced individuals
Chr3	117086020	117086271	Deletion	Twice sequenced individuals
Chr3	117505061	117505123	Deletion	Twice sequenced individuals
Chr3	117543019	117544141	Deletion	Twice sequenced individuals
Chr3	117593885	117594118	Deletion	Twice sequenced individuals
Chr3	117607613	117607654	Deletion	Twice sequenced individuals
Chr3	118150301	118150329	Deletion	Twice sequenced individuals
Chr3	118177899	118179530	Deletion	Twice sequenced individuals
Chr3	118746919	118746989	Deletion	Twice sequenced individuals
Chr3	119095817	119095875	Deletion	Twice sequenced individuals
Chr3	119261972	119262022	Deletion	Twice sequenced individuals
Chr3	119334548	119334832	Deletion	Twice sequenced individuals
Chr3	119525294	119525421	Deletion	Twice sequenced individuals
Chr3	119613774	119613814	Deletion	Twice sequenced individuals
Chr3	119680625	119680708	Deletion	Twice sequenced individuals
Chr3	119681046	119681074	Deletion	Twice sequenced individuals
Chr3	119686108	119686147	Deletion	Twice sequenced individuals
Chr3	119745298	119745326	Deletion	Twice sequenced individuals
Chr3	119846757	119847368	Deletion	Twice sequenced individuals
Chr3	120074448	120077237	Deletion	Twice sequenced individuals
Chr3	120109069	120109175	Deletion	Twice sequenced individuals
Chr3	120369808	120369841	Deletion	Twice sequenced individuals
Chr3	121354767	121354812	Deletion	Twice sequenced individuals
Chr4	15722	16971	Deletion	Twice sequenced individuals
Chr4	380744	381032	Deletion	Twice sequenced individuals
Chr4	492064	492654	Deletion	Twice sequenced individuals
Chr4	568555	568602	Deletion	Twice sequenced individuals
Chr4	964383	964474	Deletion	Twice sequenced individuals
Chr4	1098109	1098552	Deletion	Twice sequenced individuals
Chr4	1158378	1158420	Deletion	Twice sequenced individuals
Chr4	1202264	1202728	Deletion	Twice sequenced individuals
Chr4	1239211	1241946	Deletion	Twice sequenced individuals
Chr4	1369827	1369888	Deletion	Twice sequenced individuals
Chr4	1396875	1397230	Deletion	Twice sequenced individuals
Chr4	1753112	1755976	Deletion	Twice sequenced individuals
Chr4	1776422	1776542	Deletion	Twice sequenced individuals
Chr4	1882638	1882868	Deletion	Twice sequenced individuals
Chr4	2030392	2030740	Deletion	Twice sequenced individuals
Chr4	2164957	2166032	Deletion	Twice sequenced individuals
Chr4	2363183	2363455	Deletion	Twice sequenced individuals
Chr4	2449663	2449703	Deletion	Twice sequenced individuals
Chr4	2538785	2539070	Deletion	Twice sequenced individuals
Chr4	2718669	2718877	Deletion	Twice sequenced individuals
Chr4	2739268	2739542	Deletion	Twice sequenced individuals
Chr4	2756678	2756815	Deletion	Twice sequenced individuals
Chr4	3002053	3002101	Deletion	Twice sequenced individuals
Chr4	3095364	3095858	Deletion	Twice sequenced individuals
Chr4	3165248	3166340	Deletion	Twice sequenced individuals
Chr4	3224863	3224947	Deletion	Twice sequenced individuals
Chr4	3236357	3236890	Deletion	Twice sequenced individuals
Chr4	3553207	3553282	Deletion	Twice sequenced individuals
Chr4	3720536	3720714	Deletion	Twice sequenced individuals
Chr4	3790635	3790676	Deletion	Twice sequenced individuals
Chr4	3816091	3818828	Deletion	Twice sequenced individuals
Chr4	3907923	3919292	Deletion	Twice sequenced individuals
Chr4	3998929	3999009	Deletion	Twice sequenced individuals
Chr4	4054186	4055601	Deletion	Twice sequenced individuals
Chr4	4169601	4169736	Deletion	Twice sequenced individuals
Chr4	4256827	4257147	Deletion	Twice sequenced individuals
Chr4	4424334	4424372	Deletion	Twice sequenced individuals
Chr4	4778630	4779089	Deletion	Twice sequenced individuals
Chr4	4822304	4822373	Deletion	Twice sequenced individuals
Chr4	5068109	5068157	Deletion	Twice sequenced individuals
Chr4	5208470	5208499	Deletion	Twice sequenced individuals
Chr4	5979899	5979994	Deletion	Twice sequenced individuals
Chr4	6362968	6363011	Deletion	Twice sequenced individuals
Chr4	6368734	6368767	Deletion	Twice sequenced individuals
Chr4	6396615	6396698	Deletion	Twice sequenced individuals
Chr4	6512447	6512939	Deletion	Twice sequenced individuals
Chr4	6584467	6584798	Deletion	Twice sequenced individuals
Chr4	6827411	6827470	Deletion	Twice sequenced individuals
Chr4	6833720	6834049	Deletion	Twice sequenced individuals
Chr4	6883646	6883901	Deletion	Twice sequenced individuals
Chr4	6896422	6896557	Deletion	Twice sequenced individuals
Chr4	6947692	6947886	Deletion	Twice sequenced individuals
Chr4	6980589	6980833	Deletion	Twice sequenced individuals
Chr4	7163327	7164178	Deletion	Twice sequenced individuals
Chr4	7166752	7167167	Deletion	Twice sequenced individuals
Chr4	7470991	7471963	Deletion	Twice sequenced individuals
Chr4	7510922	7510983	Deletion	Twice sequenced individuals
Chr4	7513566	7513592	Deletion	Twice sequenced individuals
Chr4	7596821	7596985	Deletion	Twice sequenced individuals
Chr4	7609803	7611291	Deletion	Twice sequenced individuals
Chr4	7704276	7704663	Deletion	Twice sequenced individuals
Chr4	7723677	7723982	Deletion	Twice sequenced individuals
Chr4	8002239	8006330	Deletion	Twice sequenced individuals
Chr4	8083030	8083068	Deletion	Twice sequenced individuals
Chr4	8090158	8090205	Deletion	Twice sequenced individuals
Chr4	8090749	8090898	Deletion	Twice sequenced individuals
Chr4	8104460	8104564	Deletion	Twice sequenced individuals
Chr4	8119858	8126256	Deletion	Twice sequenced individuals
Chr4	8221196	8223340	Deletion	Twice sequenced individuals
Chr4	8602196	8602224	Deletion	Twice sequenced individuals
Chr4	8699127	8699278	Deletion	Twice sequenced individuals
Chr4	8714361	8714401	Deletion	Twice sequenced individuals
Chr4	9676179	9676210	Deletion	Twice sequenced individuals
Chr4	9726772	9726807	Deletion	Twice sequenced individuals
Chr4	10297278	10297352	Deletion	Twice sequenced individuals
Chr4	10957805	10957982	Deletion	Twice sequenced individuals
Chr4	11001203	11001346	Deletion	Twice sequenced individuals
Chr4	12562920	12563554	Deletion	Twice sequenced individuals
Chr4	13992138	13992168	Deletion	Twice sequenced individuals
Chr4	14107306	14108681	Deletion	Twice sequenced individuals
Chr4	14176484	14177131	Deletion	Twice sequenced individuals
Chr4	14425245	14425279	Deletion	Twice sequenced individuals
Chr4	14599522	14600090	Deletion	Twice sequenced individuals
Chr4	14650175	14650983	Deletion	Twice sequenced individuals
Chr4	15046583	15046707	Deletion	Twice sequenced individuals
Chr4	15204189	15205523	Deletion	Twice sequenced individuals
Chr4	15471897	15471924	Deletion	Twice sequenced individuals
Chr4	15795992	15796043	Deletion	Twice sequenced individuals
Chr4	16000890	16001003	Deletion	Twice sequenced individuals
Chr4	16131982	16133434	Deletion	Twice sequenced individuals
Chr4	16414412	16414471	Deletion	Twice sequenced individuals
Chr4	16419508	16419589	Deletion	Twice sequenced individuals
Chr4	16489438	16497617	Deletion	Twice sequenced individuals
Chr4	16540466	16540993	Deletion	Twice sequenced individuals
Chr4	16564148	16564214	Deletion	Twice sequenced individuals
Chr4	16656348	16656957	Deletion	Twice sequenced individuals
Chr4	17832755	17834933	Deletion	Twice sequenced individuals
Chr4	17926051	17926237	Deletion	Twice sequenced individuals
Chr4	18043196	18043341	Deletion	Twice sequenced individuals
Chr4	18407731	18408031	Deletion	Twice sequenced individuals
Chr4	18446481	18447133	Deletion	Twice sequenced individuals
Chr4	18638558	18638608	Deletion	Twice sequenced individuals
Chr4	18835326	18835611	Deletion	Twice sequenced individuals
Chr4	18848756	18848901	Deletion	Twice sequenced individuals
Chr4	19175680	19175760	Deletion	Twice sequenced individuals
Chr4	19361692	19361727	Deletion	Twice sequenced individuals
Chr4	19365580	19368272	Deletion	Twice sequenced individuals
Chr4	19692308	19692425	Deletion	Twice sequenced individuals
Chr4	19798221	19799167	Deletion	Twice sequenced individuals
Chr4	19838850	19838881	Deletion	Twice sequenced individuals
Chr4	19901563	19901644	Deletion	Twice sequenced individuals
Chr4	19965356	19965941	Deletion	Twice sequenced individuals
Chr4	19986851	19998132	Deletion	Twice sequenced individuals
Chr4	20275537	20276125	Deletion	Twice sequenced individuals
Chr4	20293193	20293394	Deletion	Twice sequenced individuals
Chr4	20459995	20460044	Deletion	Twice sequenced individuals
Chr4	21160727	21160792	Deletion	Twice sequenced individuals
Chr4	21336825	21337114	Deletion	Twice sequenced individuals
Chr4	21534124	21534237	Deletion	Twice sequenced individuals
Chr4	21534647	21535105	Deletion	Twice sequenced individuals
Chr4	21565099	21565161	Deletion	Twice sequenced individuals
Chr4	21738591	21738724	Deletion	Twice sequenced individuals
Chr4	21743520	21743558	Deletion	Twice sequenced individuals
Chr4	21939016	21939051	Deletion	Twice sequenced individuals
Chr4	22557564	22558660	Deletion	Twice sequenced individuals
Chr4	22651218	22651262	Deletion	Twice sequenced individuals
Chr4	22768384	22768436	Deletion	Twice sequenced individuals
Chr4	22842368	22842511	Deletion	Twice sequenced individuals
Chr4	22857641	22858425	Deletion	Twice sequenced individuals
Chr4	23023949	23025823	Deletion	Twice sequenced individuals
Chr4	23359230	23359500	Deletion	Twice sequenced individuals
Chr4	23458097	23458163	Deletion	Twice sequenced individuals
Chr4	23597471	23599256	Deletion	Twice sequenced individuals
Chr4	24076277	24076822	Deletion	Twice sequenced individuals
Chr4	24269777	24269884	Deletion	Twice sequenced individuals
Chr4	24273852	24273982	Deletion	Twice sequenced individuals
Chr4	24424806	24424842	Deletion	Twice sequenced individuals
Chr4	24467053	24467109	Deletion	Twice sequenced individuals
Chr4	24812277	24812343	Deletion	Twice sequenced individuals
Chr4	25837320	25837374	Deletion	Twice sequenced individuals
Chr4	25901892	25902485	Deletion	Twice sequenced individuals
Chr4	26163987	26164192	Deletion	Twice sequenced individuals
Chr4	26317692	26317768	Deletion	Twice sequenced individuals
Chr4	26716570	26717605	Deletion	Twice sequenced individuals
Chr4	27135192	27135222	Deletion	Twice sequenced individuals
Chr4	27504588	27504614	Deletion	Twice sequenced individuals
Chr4	28549362	28549406	Deletion	Twice sequenced individuals
Chr4	28600913	28600949	Deletion	Twice sequenced individuals
Chr4	28743283	28752521	Deletion	Twice sequenced individuals
Chr4	28878493	28880959	Deletion	Twice sequenced individuals
Chr4	29092540	29092568	Deletion	Twice sequenced individuals
Chr4	29140097	29140137	Deletion	Twice sequenced individuals
Chr4	30149390	30149426	Deletion	Twice sequenced individuals
Chr4	30160010	30160132	Deletion	Twice sequenced individuals
Chr4	30571203	30571233	Deletion	Twice sequenced individuals
Chr4	31823720	31823779	Deletion	Twice sequenced individuals
Chr4	31974072	31974110	Deletion	Twice sequenced individuals
Chr4	31980953	31980996	Deletion	Twice sequenced individuals
Chr4	32014876	32014927	Deletion	Twice sequenced individuals
Chr4	32040487	32040574	Deletion	Twice sequenced individuals
Chr4	32052710	32052815	Deletion	Twice sequenced individuals
Chr4	32056842	32056868	Deletion	Twice sequenced individuals
Chr4	32077051	32077091	Deletion	Twice sequenced individuals
Chr4	32618915	32618974	Deletion	Twice sequenced individuals
Chr4	32907969	32908079	Deletion	Twice sequenced individuals
Chr4	33462410	33462437	Deletion	Twice sequenced individuals
Chr4	33491871	33491900	Deletion	Twice sequenced individuals
Chr4	33507493	33509023	Deletion	Twice sequenced individuals
Chr4	33530740	33532949	Deletion	Twice sequenced individuals
Chr4	33728380	33728410	Deletion	Twice sequenced individuals
Chr4	33977123	33977161	Deletion	Twice sequenced individuals
Chr4	34037203	34037235	Deletion	Twice sequenced individuals
Chr4	34412342	34412718	Deletion	Twice sequenced individuals
Chr4	34523901	34523981	Deletion	Twice sequenced individuals
Chr4	34805359	34805479	Deletion	Twice sequenced individuals
Chr4	35393295	35393326	Deletion	Twice sequenced individuals
Chr4	35806371	35806403	Deletion	Twice sequenced individuals
Chr4	35921732	35921889	Deletion	Twice sequenced individuals
Chr4	36275721	36275774	Deletion	Twice sequenced individuals
Chr4	36437745	36440940	Deletion	Twice sequenced individuals
Chr4	36547030	36547378	Deletion	Twice sequenced individuals
Chr4	36707514	36707553	Deletion	Twice sequenced individuals
Chr4	36980924	36981381	Deletion	Twice sequenced individuals
Chr4	37491911	37493326	Deletion	Twice sequenced individuals
Chr4	37559287	37559466	Deletion	Twice sequenced individuals
Chr4	38046534	38046626	Deletion	Twice sequenced individuals
Chr4	38297796	38298514	Deletion	Twice sequenced individuals
Chr4	38462459	38462487	Deletion	Twice sequenced individuals
Chr4	38504131	38504158	Deletion	Twice sequenced individuals
Chr4	38563798	38563855	Deletion	Twice sequenced individuals
Chr4	38936476	38936812	Deletion	Twice sequenced individuals
Chr4	40075432	40075642	Deletion	Twice sequenced individuals
Chr4	40616006	40616053	Deletion	Twice sequenced individuals
Chr4	40728204	40728742	Deletion	Twice sequenced individuals
Chr4	40831204	40831321	Deletion	Twice sequenced individuals
Chr4	41230129	41230156	Deletion	Twice sequenced individuals
Chr4	41345938	41346534	Deletion	Twice sequenced individuals
Chr4	41982142	41982172	Deletion	Twice sequenced individuals
Chr4	42514177	42521158	Deletion	Twice sequenced individuals
Chr4	42782826	42782871	Deletion	Twice sequenced individuals
Chr4	42911877	42913103	Deletion	Twice sequenced individuals
Chr4	43003069	43003166	Deletion	Twice sequenced individuals
Chr4	43313183	43313218	Deletion	Twice sequenced individuals
Chr4	43394063	43394285	Deletion	Twice sequenced individuals
[truncated: 14,847 more rows]
