# Supplementary material for: Detection and validation of structural variations in bovine whole-genome sequence data
Source: Genet Sel Evol. 2017 Jan 25;49:13. doi: 10.1186/s12711-017-0286-5 (PMC5267451; doi:10.1186/s12711-017-0286-5)
Supplement: Supplementary file 5 — Additional file 5: Table S7. RefSeq genes that overlap with SV. This file contains the RefSeq genes that overlapped with the validated SV set and the length of the overlap and percentage covered for those genes. [file 12711_2017_286_MOESM5_ESM.xlsx]

## Sheet: TWICE_SEQ_DEL
GeneID	Chr	Start	End	Gene Length	Overlap Length with SV	Gene % overlapped with SV
POLR2K	Chr14	23735734	23737482	1748	1748	1
THOC7	Chr17	18734076	18735046	970	970	1
BIRC3	Chr12	68372399	68373703	1304	1303	0.999233
LZTFL1	Chr5	50506611	50506997	386	385	0.997409
TMSB4	Chr1	51022807	51023449	642	633	0.985981
LLPH	Chr5	47901611	47905608	3997	3181	0.795847
MIR6533	Chr28	24903965	24904042	77	49	0.636364
C11H9orf16	Chr11	98801790	98805191	3401	1293	0.380182
GSTA3	Chr23	24935506	24957718	22212	7692	0.346299
PCBP2	Chr5	26702494	26721581	19087	5841	0.30602
CCDC59	Chr5	11972437	11978864	6427	1622	0.252373
C11H9orf78	Chr11	100228239	100236769	8530	2014	0.236108
GSKIP	Chr21	62870562	62892536	21974	4688	0.213343
SSX5	ChrX	91613381	91639011	25630	5242	0.204526
LOC100125776	Chr15	46663447	46674104	10657	2145	0.201276
ARHGEF5	Chr4	108448574	108471244	22670	4507	0.198809
AHCY	Chr13	64258557	64274274	15717	3008	0.191385
37316	Chr16	24929464	24973373	43909	8240	0.187661
40422	Chr11	44150750	44188823	38073	6486	0.170357
TMEM251	Chr21	58404639	58407261	2622	426	0.162471
NHEDC1	Chr6	23187623	23229528	41905	6098	0.14552
H2AFZ	Chr6	26101818	26104493	2675	346	0.129346
ZNF567	Chr18	47089346	47118008	28662	3513	0.122566
FBXL2	Chr22	7645492	7720331	74839	8862	0.118414
ASNSD1	Chr2	6605442	6616484	11042	1297	0.117461
CDC42SE1	Chr3	19768809	19776436	7627	845	0.110791
RNASEL	Chr16	65097627	65115555	17928	1985	0.110721
H2AFZ	Chr6	26101818	26104493	2675	253	0.0945794
AP1AR	Chr6	14425501	14454377	28876	2701	0.0935379
TXLNB	Chr9	77937302	77996890	59588	5500	0.0923005
BPIFB5	Chr13	63311350	63329709	18359	1654	0.0900921
MRPS36	Chr20	10390981	10399140	8159	708	0.0867753
SPINK4	Chr8	76329356	76348122	18766	1491	0.0794522
PLSCR1	Chr1	123009128	123060130	51002	3797	0.0744481
41883	Chr25	27838685	27870033	31348	2328	0.0742631
LOC514257	Chr4	99787243	99948547	161304	11847	0.0734452
PILRA	Chr25	36673963	36691626	17663	1276	0.0722414
GPAT2	Chr11	2130833	2140973	10140	730	0.0719921
FAHD2A	Chr11	2119289	2130742	11453	818	0.0714223
LOC100139318	Chr2	95370099	95375107	5008	348	0.0694888
RASEF	Chr8	77514028	77609180	95152	6458	0.0678704
SUCLA2	Chr12	17884899	17930933	46034	3096	0.0672546
BICD2	Chr8	85688470	85743419	54949	3349	0.0609474
ZNF177	Chr7	15324726	15346776	22050	1300	0.0589569
STAMBP	Chr11	10771662	10795813	24151	1418	0.0587139
RPS23	Chr7	84523779	84525639	1860	107	0.0575269
GSPT1	Chr25	10622208	10652097	29889	1690	0.0565425
YWHAQ	Chr11	87842279	87873675	31396	1763	0.0561537
RPA2	Chr2	126030986	126055501	24515	1344	0.0548236
C9H6orf118	Chr9	101942118	101966174	24056	1299	0.053999
STAP1	Chr6	85013013	85043207	30194	1628	0.053918
USP30	Chr17	66239944	66263958	24014	1289	0.053677
FANCI	Chr21	21137917	21198618	60701	3254	0.053607
GBA	Chr3	15445101	15463930	18829	1008	0.0535344
LAP3	Chr6	38574589	38600027	25438	1347	0.0529523
ITM2C	Chr2	119476495	119490381	13886	728	0.0524269
MATN2	Chr14	68478178	68651684	173506	9073	0.0522921
FSTL1	Chr1	65742625	65802423	59798	2923	0.0488812
UGT8	Chr6	12092952	12201473	108521	5000	0.046074
CD4	Chr5	103994654	104010513	15859	727	0.0458415
CBR1	Chr1	150054220	150064637	10417	473	0.0454065
RUNDC1	Chr19	43653716	43663058	9342	407	0.0435667
BPIFB3	Chr13	62901451	62918251	16800	711	0.0423214
PRRC1	Chr7	27684800	27733587	48787	2023	0.041466
ABCG5	Chr11	26124238	26156411	32173	1302	0.0404687
MGAT4C	Chr5	15741025	15822052	81027	3266	0.0403076
IFNT3	Chr8	22607770	22634019	26249	1054	0.0401539
IFNT	Chr8	22607642	22634001	26359	1054	0.0399863
BLA-DQB	Chr23	25855144	25863045	7901	315	0.0398684
IFNT2	Chr8	22607761	22634255	26494	1054	0.0397826
SLC35F6	Chr11	72793628	72809693	16065	622	0.0387177
CCDC113	Chr18	26169326	26203176	33850	1306	0.038582
ZNF268	Chr17	45191288	45218104	26816	1034	0.0385591
VSTM1	Chr18	62145369	62165477	20108	752	0.0373981
PPEF2	Chr6	92450669	92484567	33898	1223	0.0360788
CDYL2	Chr18	7421232	7474073	52841	1881	0.0355974
GBP5	Chr3	54253046	54269516	16470	585	0.0355191
EIF2S2	Chr13	64050710	64069300	18590	649	0.0349112
DPCD	Chr26	22205906	22227993	22087	758	0.0343188
POC5	Chr10	7013625	7044633	31008	1051	0.0338945
CCL14	Chr19	14775261	14780085	4824	158	0.0327529
RWDD3	Chr3	48398157	48410727	12570	411	0.0326969
PPEF2	Chr6	92450669	92484567	33898	1104	0.0325683
CTTNBP2NL	Chr3	30987501	31026962	39461	1249	0.0316515
FGL1	Chr27	18447668	18472633	24965	772	0.0309233
GULO	Chr8	75984695	76010700	26005	803	0.0308787
IVNS1ABP	Chr16	67764139	67777311	13172	406	0.030823
RNF175	Chr17	3880447	3946699	66252	2021	0.0305047
C1GALT1	Chr4	15183825	15227665	43840	1334	0.0304288
TASP1	Chr13	7131225	7383852	252627	7612	0.0301314
CYTIP	Chr2	38682029	38711144	29115	864	0.0296754
SHC1	Chr3	15674436	15681845	7409	219	0.0295586
LHX6	Chr11	93068238	93090242	22004	648	0.0294492
GNL3L	ChrX	97432889	97461196	28307	824	0.0291094
ZNF177	Chr7	15324726	15346776	22050	636	0.0288435
SLC10A7	Chr17	11923470	12064071	140601	4041	0.0287409
TMEM237	Chr2	90588103	90610465	22362	639	0.0285753
ECHS1	Chr26	25856474	25865608	9134	259	0.0283556
RUNX1	Chr1	148678709	148949053	270344	7637	0.0282492
IGFBP7	Chr6	74071063	74150456	79393	2209	0.0278236
PRRC1	Chr7	27684800	27733587	48787	1330	0.0272614
FAM105A	Chr20	58634392	58664249	29857	810	0.0271293
C2H2orf88	Chr2	6038401	6113008	74607	1924	0.0257885
SCFD1	Chr21	41692841	41804340	111499	2869	0.0257312
TFPI	Chr2	8786392	8884005	97613	2496	0.0255704
CRLF3	Chr19	18456445	18497948	41503	1052	0.0253476
DOCK9	Chr12	79691578	79870108	178530	4517	0.0253011
CNRIP1	Chr11	66679941	66704192	24251	610	0.0251536
LYPLAL1	Chr16	23350278	23382371	32093	802	0.0249899
MBOAT1	Chr23	37498571	37608778	110207	2724	0.0247171
MAGEA11	ChrX	21831080	21969961	138881	3389	0.0244022
LMNB1	Chr7	28414056	28465720	51664	1247	0.0241367
PTK2	Chr14	3870892	4065009	194117	4437	0.0228573
PAOX	Chr26	25828812	25837194	8382	188	0.022429
ENKUR	Chr13	26078956	26115031	36075	798	0.0221206
ERAP2	Chr7	98715724	98767730	52006	1145	0.0220167
SERPINB10	Chr24	62615490	62638858	23368	505	0.0216107
PRP6	Chr23	34479661	34491996	12335	261	0.0211593
SHC1	Chr3	15671382	15681845	10463	219	0.0209309
UBA1	ChrX	90831726	90850347	18621	388	0.0208367
KCTD20	Chr23	10355457	10391460	36003	749	0.0208038
SLC22A9	Chr29	39816793	39830937	14144	293	0.0207155
RLBP1	Chr21	21117497	21280811	163314	3254	0.0199248
ZNF286A	Chr19	33673395	33688127	14732	286	0.0194135
TUFT1	Chr3	19238264	19289302	51038	987	0.0193385
DDX3X	ChrX	107678776	107691829	13053	242	0.0185398
PACSIN2	Chr5	114357558	114475163	117605	2170	0.0184516
YIPF7	Chr6	64882681	64916426	33745	615	0.0182249
APLF	Chr11	66840543	66933745	93202	1671	0.0179288
SAR1A	Chr28	26542607	26553908	11301	198	0.0175206
FAM151B	Chr7	82923269	82957972	34703	608	0.0175201
QDPR	Chr6	117727459	117746408	18949	331	0.0174679
CCR9	Chr22	54041053	54057181	16128	280	0.0173611
SI	Chr1	103088852	103204728	115876	1992	0.0171908
TULP3	Chr5	107343154	107373637	30483	516	0.0169275
OTULIN	Chr20	58563063	58596022	32959	556	0.0168694
PYROXD2	Chr26	19334007	19359393	25386	420	0.0165446
PLCE1	Chr26	15371779	15702253	330474	5445	0.0164763
MTFR1	Chr14	31735267	31794502	59235	972	0.0164092
SSH3	Chr29	45870039	45877739	7700	125	0.0162338
CAPZA2	Chr4	51781843	51836823	54980	883	0.0160604
MMS22L	Chr9	53228693	53352399	123706	1986	0.0160542
CAST	Chr7	98444978	98578299	133321	2125	0.015939
KIF21A	Chr5	41963880	42148320	184440	2913	0.0157938
GYG1	Chr1	120089900	120127893	37993	600	0.0157924
BMS1	Chr28	13293067	13325276	32209	506	0.0157099
CAST	Chr7	98445836	98581253	135417	2125	0.0156923
C1QTNF7	Chr6	115276057	115404039	127982	1999	0.0156194
BMP5	Chr23	4390361	4535529	145168	2219	0.0152857
DNALI1	Chr3	108917608	108925078	7470	112	0.0149933
CD1A	Chr3	11993975	11996933	2958	44	0.0148749
RAP1GDS1	Chr6	27535298	27638248	102950	1521	0.0147742
DDX3X	ChrX	107678776	107691829	13053	192	0.0147093
METTL24	Chr9	40335193	40462569	127376	1866	0.0146495
CNTN5	Chr15	9446547	9985709	539162	7838	0.0145374
CRY1	Chr5	70604519	70701030	96511	1396	0.0144647
NAP1L1	Chr5	5575917	5612121	36204	521	0.0143907
OPRM1	Chr9	92152081	92209694	57613	827	0.0143544
ADCYAP1R1	Chr4	65670542	65729276	58734	839	0.0142847
ENOPH1	Chr6	98990765	99029323	38558	549	0.0142383
RAP1A	Chr3	31742452	31830691	88239	1240	0.0140527
PLD1	Chr1	96517508	96676253	158745	2204	0.0138839
STS	ChrX	146611849	146751829	139980	1937	0.0138377
MINA	Chr1	41826467	41859594	33127	455	0.013735
XPR1	Chr16	63299969	63502107	202138	2759	0.0136491
PPA2	Chr6	20984353	21082556	98203	1291	0.0131462
BCKDK	Chr25	27468635	27472844	4209	55	0.0130672
ZC2HC1A	Chr14	44029111	44077940	48829	627	0.0128407
LOC100139318	Chr2	95370099	95375107	5008	64	0.0127796
SEPHS2	Chr25	26866846	26869142	2296	29	0.0126307
MYOF	Chr26	14667437	14848281	180844	2284	0.0126297
LRRC57	Chr10	37989930	37995318	5388	68	0.0126206
LYSMD3	Chr7	92440984	92446470	5486	69	0.0125775
AOX4	Chr2	89699123	89771427	72304	909	0.0125719
CD1A	Chr3	11993521	11997024	3503	44	0.0125607
MYCBP2	Chr12	52496958	52769208	272250	3412	0.0125326
CSN1S1	Chr6	87141555	87159096	17541	217	0.012371
TRIM28	Chr18	65953793	65960264	6471	80	0.0123628
ADGB	Chr9	85020550	85218729	198179	2439	0.0123071
FAM198B	Chr17	41769526	41784178	14652	180	0.012285
STRN	Chr11	19337617	19445398	107781	1322	0.0122656
ELMOD1	Chr15	17375526	17461025	85499	1046	0.0122341
SEPHS2	Chr25	26866846	26869142	2296	28	0.0121951
CDH20	Chr24	60532424	60586878	54454	661	0.0121387
CCDC141	Chr2	17791921	18014350	222429	2686	0.0120758
TRIM28	Chr18	65953793	65960264	6471	78	0.0120538
TRIM28	Chr18	65953793	65960264	6471	77	0.0118992
ITFG2	Chr5	107426512	107436896	10384	123	0.0118451
TYR	Chr29	6351876	6462240	110364	1297	0.011752
SAMD5	Chr9	85917824	86020619	102795	1204	0.0117126
SUGT1	Chr12	11131390	11172147	40757	476	0.011679
GSTM3	Chr3	33768049	33770824	2775	32	0.0115315
LOC522449	Chr7	17218637	17229543	10906	125	0.0114616
NHEDC1	Chr6	23187623	23229528	41905	477	0.0113829
RALGDS	Chr11	103125340	103176378	51038	580	0.0113641
NR2C1	Chr5	24883374	24922146	38772	440	0.0113484
KLHL14	Chr24	24673955	24787757	113802	1273	0.0111861
BOLA-DYB	Chr23	7036909	7045346	8437	94	0.0111414
CYTH4	Chr5	76080337	76109479	29142	318	0.0109121
CLHC1	Chr11	37787987	37822911	34924	381	0.0109094
FRMD4B	Chr22	32471629	32498351	26722	290	0.0108525
TG	Chr14	9262249	9508938	246689	2669	0.0108193
PKN2	Chr3	55231809	55365736	133927	1439	0.0107447
CDK14	Chr4	7844073	8440697	596624	6398	0.0107237
DSCC1	Chr14	83641875	83654475	12600	135	0.0107143
ESR2	Chr10	76707921	76757370	49449	528	0.0106777
IFNT3	Chr8	22607770	22634019	26249	279	0.010629
IFNT	Chr8	22607642	22634001	26359	279	0.0105846
IFNT2	Chr8	22607761	22634255	26494	279	0.0105307
FSHR	Chr11	31110743	31305197	194454	2047	0.0105269
CSPP1	Chr14	33230500	33342863	112363	1177	0.010475
TTLL4	Chr2	107412037	107428755	16718	174	0.0104079
ZNF385B	Chr2	17084638	17449868	365230	3779	0.0103469
ANXA3	Chr6	95065255	95136947	71692	730	0.0101824
GPR110	Chr23	20206357	20250984	44627	448	0.0100388
PELI1	Chr11	62471606	62528075	56469	566	0.0100232
ITGBL1	Chr12	81873526	82108677	235151	2335	0.00992979
ARHGAP20	Chr15	20907086	21120246	213160	2107	0.00988459
TMEM167B	Chr3	34401023	34405907	4884	48	0.00982801
MOV10	Chr3	30776859	30804255	27396	269	0.00981895
ATG4A	ChrX	61017761	61050945	33184	325	0.00979388
PAG18	Chr29	38428101	38437106	9005	87	0.0096613
RPS18	Chr23	7388702	7393363	4661	45	0.00965458
HCLS1	Chr1	66720534	66754184	33650	324	0.00962853
EIF2B3	Chr3	101641923	101756575	114652	1099	0.00958553
NSFL1C	Chr13	60244888	60265286	20398	195	0.00955976
PLCXD3	Chr20	33030482	33230696	200214	1904	0.00950982
MGC152010	Chr6	86400285	86439022	38737	367	0.00947415
ULBP21	Chr9	88273908	88299080	25172	238	0.00945495
TMIGD3	Chr3	31900269	31986508	86239	807	0.00935772
NCALD	Chr14	64875134	64898581	23447	219	0.00934021
GPR37	Chr4	89805488	89823611	18123	169	0.00932517
ADGB	Chr9	85020550	85218729	198179	1836	0.00926435
ZNF629	Chr25	27158932	27181608	22676	208	0.00917269
PPT2	Chr23	27028164	27035589	7425	68	0.00915825
KIAA1324L	Chr4	33518952	33763022	244070	2209	0.00905068
PADI2	Chr2	136049643	136098119	48476	434	0.00895288
CDH18	Chr20	53409875	54014026	604151	5407	0.00894975
SMAGP	Chr5	28683697	28709509	25812	231	0.00894933
ORC5	Chr4	45594204	45682229	88025	787	0.00894064
DNAL1	Chr10	85467721	85504544	36823	329	0.00893463
IL20RA	Chr9	75979322	76012398	33076	295	0.00891885
ZNF771	Chr25	26840151	26848527	8376	74	0.00883477
IFT80	Chr1	107936922	108059854	122932	1078	0.00876908
LOC783508	Chr19	19833709	19877349	43640	382	0.00875344
SAFB	Chr7	19846023	19876686	30663	268	0.00874018
GOLGA5	Chr21	58070188	58098928	28740	250	0.00869868
GLIPR1L1	Chr5	4824768	4866971	42203	367	0.00869606
PID1	Chr2	117836405	118104185	267780	2323	0.00867503
TFEC	Chr4	52589573	52812810	223237	1936	0.0086724
PIK3R3	Chr3	100565314	100666691	101377	879	0.00867061
AGPAT5	Chr27	4679599	4727246	47647	410	0.00860495
PCMTD2	Chr13	54123571	54142541	18970	163	0.00859251
AIG1	Chr9	81550368	81829533	279165	2364	0.00846811
SUMO2	Chr19	56923969	56930824	6855	58	0.00846098
WBSCR17	Chr25	29391799	29824281	432482	3635	0.00840497
PALM2	Chr8	101018439	101182488	164049	1378	0.00839993
GLYAT	Chr15	83455512	83469280	13768	115	0.0083527
CUBN	Chr13	31559726	31826838	267112	2227	0.00833733
LYVE1	Chr15	42678183	42692474	14291	119	0.00832692
ELOVL5	Chr23	25155741	25228997	73256	607	0.00828601
FAM3A	ChrX	40469570	40477912	8342	69	0.0082714
KCTD16	Chr7	57253494	57563268	309774	2559	0.00826086
TTC1	Chr7	73708739	73757646	48907	402	0.00821968
STXBP5	Chr9	85627753	85785707	157954	1295	0.00819859
TCF12	Chr10	53089212	53481049	391837	3195	0.0081539
ERH	Chr10	81520783	81533472	12689	103	0.00811727
TFEC	Chr4	52589573	52812810	223237	1811	0.00811245
GALK2	Chr10	61139585	61295379	155794	1259	0.00808118
CYLD	Chr18	19224239	19293984	69745	561	0.00804359
DEFB122	Chr13	61572836	61577455	4619	37	0.00801039
EVC	Chr6	105171715	105275204	103489	828	0.00800085
ATOX1	Chr7	64945747	64961110	15363	122	0.00794116
MTPN	Chr4	100550305	100626568	76263	605	0.00793307
FLNB	Chr22	43674719	43815706	140987	1118	0.00792981
STK38	Chr23	10395673	10436810	41137	326	0.00792474
FOLH1B	Chr29	5904660	5977332	72672	575	0.00791226
TNK2	Chr1	71207393	71230157	22764	180	0.00790722
TMIGD3	Chr3	31900269	31986508	86239	680	0.00788506
SPATA6	Chr3	98370382	98536867	166485	1291	0.00775445
FCER1G	Chr3	8305542	8308776	3234	25	0.00773036
ELMOD1	Chr15	17375526	17461025	85499	660	0.00771939
SLC30A7	Chr3	42465564	42559234	93670	714	0.0076225
PLLP	Chr18	25342319	25346804	4485	34	0.00758082
STXBP6	Chr21	35415157	35655955	240798	1824	0.00757481
ZBTB11	Chr1	46382670	46412646	29976	224	0.00747264
BOLA	Chr23	28330911	28506282	175371	1300	0.00741286
ITGA3	Chr19	37198634	37231287	32653	242	0.00741126
AMZ2	Chr19	62506949	62514776	7827	58	0.00741025
SPAM1	Chr4	88989464	89008939	19475	144	0.00739409
EPB41L4A	Chr10	1467375	1761415	294040	2163	0.00735614
GSTT4	Chr17	73292732	73297355	4623	34	0.00735453
ANKRD22	Chr26	10542371	10570091	27720	203	0.00732323
RHOT1	Chr19	18249106	18317210	68104	497	0.00729766
ANKH	Chr20	58376938	58546813	169875	1238	0.00728771
BPIFA2C	Chr13	63086221	63095440	9219	67	0.0072676
SPAG9	Chr19	36343606	36422983	79377	575	0.00724391
MROH7	Chr3	92136664	92190804	54140	392	0.00724049
LOC509513	Chr4	106638734	106904802	266068	1897	0.00712976
CCDC151	Chr7	17023512	17034185	10673	76	0.00712077
OXSR1	Chr22	11674126	11758890	84764	603	0.00711387
CLIC5	Chr23	19167357	19333272	165915	1175	0.00708194
ATP6V1H	Chr14	23511299	23558678	47379	332	0.00700732
COLQ	Chr1	154218713	154285721	67008	468	0.00698424
CACNA1A	Chr7	13249277	13506235	256958	1790	0.00696612
GUCY1A2	Chr15	16604380	17100655	496275	3420	0.00689134
CDK14	Chr4	7844073	8440697	596624	4091	0.00685691
CPNE8	Chr5	42421553	42698413	276860	1896	0.00684823
SYN1	ChrX	91191331	91437203	245872	1682	0.00684096
TPD52L1	Chr9	26310575	26403759	93184	632	0.00678228
KCTD8	Chr6	64486958	64750899	263941	1780	0.00674393
TINAG	Chr23	5953507	6059979	106472	717	0.00673416
ARL5A	Chr2	44468904	44491774	22870	154	0.00673371
SV2B	Chr21	16214667	16460490	245823	1651	0.00671621
PLA2G16	Chr29	42578107	42608367	30260	201	0.00664243
RALGPS2	Chr16	61559976	61719616	159640	1060	0.00663994
RNASEL	Chr16	65097627	65115555	17928	119	0.00663766
VSTM1	Chr18	62145369	62165477	20108	133	0.00661428
HOMER1	Chr10	10350690	10484916	134226	882	0.00657101
LDHC	Chr29	26506378	26539353	32975	215	0.00652009
LDHC	Chr29	26506378	26539353	32975	215	0.00652009
DEFB122	Chr13	61572836	61577455	4619	30	0.00649491
FAT3	Chr29	1965868	2605170	639302	4146	0.0064852
SGPL1	Chr28	27133425	27185947	52522	339	0.00645444
STIM1	Chr15	51845549	52049268	203719	1305	0.00640588
WARS2	Chr3	24105658	24200031	94373	603	0.00638954
MYBPC1	Chr5	65737955	65840835	102880	653	0.0063472
CAMK2A	Chr7	63576969	63641028	64059	406	0.00633791
ATRN	Chr13	52003103	52192979	189876	1199	0.00631465
SUCLG1	Chr11	50400444	50453412	52968	334	0.00630569
LHFPL3	Chr4	45806017	46389155	583138	3655	0.00626781
SLC7A5	Chr18	13341369	13370494	29125	181	0.00621459
BMPR2	Chr2	91280846	91468320	187474	1154	0.00615552
DTNB	Chr11	73724473	73935363	210890	1288	0.00610745
TEKT3	Chr19	33418196	33451244	33048	198	0.00599129
OGFOD1	Chr18	24237404	24267636	30232	181	0.00598703
PEPD	Chr18	44018756	44137173	118417	704	0.00594509
WDR70	Chr20	36707137	36993695	286558	1688	0.00589061
CSGALNACT1	Chr27	37841209	38016342	175133	1022	0.00583556
STK38L	Chr5	82972060	83055263	83203	484	0.0058171
NXPH1	Chr4	17509341	17884255	374914	2178	0.00580933
SLC1A6	Chr7	9199582	9224807	25225	146	0.00578791
METTL15	Chr15	59585679	59800572	214893	1242	0.00577962
CRB1	Chr16	78094757	78320235	225478	1302	0.0057744
DDX47	Chr5	97490411	97503460	13049	75	0.00574757
IL1RAP	Chr1	77223041	77343645	120604	692	0.00573779
GPAM	Chr26	32963399	33003349	39950	229	0.00573217
C4H7orf57	Chr4	7576860	7605503	28643	164	0.00572566
CRYL1	Chr12	36187110	36243546	56436	323	0.0057233
KCNQ1	Chr29	49400767	49728355	327588	1869	0.00570534
NUP160	Chr15	78731304	78774448	43144	245	0.00567866
ZNF280B	Chr17	51251538	51262528	10990	62	0.00564149
NQO1	Chr18	36911355	36924689	13334	75	0.00562472
RBM48	Chr4	9723790	9730053	6263	35	0.00558838
TRPC4	Chr12	23989789	24194475	204686	1142	0.00557928
LOC777593	Chr7	61639307	61734503	95196	530	0.00556746
EFTUD2	Chr19	45197097	45233617	36520	203	0.0055586
SLA2	Chr13	66368688	66395515	26827	149	0.00555411
GCK	Chr4	77820948	77857152	36204	201	0.00555187
ARHGEF17	Chr15	53582240	53645294	63054	350	0.0055508
CELF4	Chr24	19819064	20129088	310024	1720	0.00554796
ZC3H11A	Chr16	1398309	1442440	44131	244	0.00552899
RAB3D	Chr7	16961022	16970091	9069	50	0.00551329
FHIT	Chr22	40603978	42134601	1530623	8376	0.00547228
C11H2orf73	Chr11	36887204	36913565	26361	144	0.00546262
NBAS	Chr11	82885996	83188442	302446	1648	0.00544891
GABRD	Chr16	51963930	51974494	10564	57	0.00539568
TPK1	Chr4	108539464	108922091	382627	2058	0.00537861
TINAG	Chr23	5953507	6059979	106472	571	0.00536291
CCDC102A	Chr18	25580586	25602166	21580	115	0.00532901
NDST3	Chr6	8124490	8251738	127248	678	0.00532818
ZNF8	Chr18	65787331	65794000	6669	35	0.00524816
FREM1	Chr8	29353417	29504029	150612	787	0.00522535
STXBP6	Chr21	35415157	35655955	240798	1258	0.0052243
PADI1	Chr2	135922928	135967599	44671	233	0.00521591
TNFRSF21	Chr23	20410837	20474989	64152	333	0.0051908
FGGY	Chr3	86788073	87273175	485102	2486	0.0051247
RPP40	Chr23	49410713	49420478	9765	50	0.00512033
ITGB6	Chr2	36256324	36348759	92435	468	0.00506302
SCARB2	Chr6	92797817	92879565	81748	413	0.00505211
LRGUK	Chr4	98639419	98791780	152361	767	0.0050341
ODZ3	Chr27	12356854	12810551	453697	2283	0.00503199
JAKMIP2	Chr7	60809070	60998968	189898	951	0.00500795
AGGF1	Chr10	8110495	8157658	47163	235	0.00498272
FOLH1B	Chr29	5904660	5977332	72672	361	0.00496753
LRRC20	Chr28	26665367	26735793	70426	349	0.00495556
TMEM117	Chr5	36197270	36807308	610038	3005	0.00492592
RPS24	Chr28	33926496	33931777	5281	26	0.00492331
CLIC5	Chr23	19167357	19333272	165915	815	0.00491215
VOPP1	Chr22	495505	677104	181599	866	0.00476875
NXN	Chr19	22457711	22621494	163783	778	0.00475019
CHD1	Chr7	100492793	100565697	72904	341	0.00467738
RPL31	Chr11	6003176	6008528	5352	25	0.00467115
HOPX	Chr6	73639367	73648429	9062	42	0.00463474
SERPINB7	Chr24	62512308	62530952	18644	86	0.00461274
BPIFA3	Chr13	63227592	63239140	11548	53	0.00458954
GAS2	Chr29	22275084	22423775	148691	682	0.00458669
SMG6	Chr19	23660755	23858483	197728	905	0.00457699
IGF1R	Chr21	7967717	8268093	300376	1374	0.00457427
RGS18	Chr16	13744181	13774629	30448	139	0.00456516
ALCAM	Chr1	50332271	50558841	226570	1034	0.00456371
AGMO	Chr4	23499625	23891236	391611	1785	0.00455809
TUBGCP2	Chr26	25944203	25958641	14438	65	0.00450201
SLIT3	Chr20	324338	1051861	727523	3275	0.00450158
PBX1	Chr3	4227488	4527427	299939	1350	0.00450092
FAM49B	Chr14	11761797	11871731	109934	492	0.00447541
COQ3	Chr9	51053687	51077750	24063	106	0.0044051
CLECL1	Chr5	100762266	100779161	16895	74	0.00437999
CCNI	Chr6	93633304	93672214	38910	170	0.00436906
KRT222	Chr19	41515529	41524688	9159	40	0.00436729
CLPB	Chr15	52661472	52804186	142714	622	0.00435837
TBRG1	Chr29	28469439	28481171	11732	51	0.00434708
MLPH	Chr3	117584072	117637812	53740	233	0.00433569
PDZK1	Chr3	21755126	21801225	46099	198	0.0042951
RABL6	Chr11	106344497	106363593	19096	82	0.00429409
MRPS27	Chr20	9211236	9315275	104039	440	0.00422918
AOX4	Chr2	89699123	89771427	72304	303	0.00419064
SEC23IP	Chr26	40346539	40380689	34150	143	0.00418741
RPS6KA2	Chr9	102918981	103074109	155128	648	0.0041772
BOLA	Chr23	28330911	28506282	175371	732	0.00417401
METTL16	Chr19	23961073	24023406	62333	260	0.00417115
LY75	Chr2	36557430	36647950	90520	374	0.00413168
ITGBL1	Chr12	81873526	82108677	235151	970	0.00412501
BUB1	Chr11	1559189	1592166	32977	136	0.00412409
BAI1	Chr14	2948771	3014380	65609	270	0.00411529
PHF20	Chr13	65616356	65741829	125473	516	0.00411244
ITGA9	Chr22	10946190	11307086	360896	1483	0.00410922
CCDC91	Chr5	81582316	81992463	410147	1685	0.00410828
DNAJB4	Chr3	66922935	66931502	8567	35	0.00408544
FMOD	Chr16	925080	935131	10051	41	0.0040792
RPTOR	Chr19	52308518	52629957	321439	1294	0.00402565
ESR1	Chr9	89967416	90256185	288769	1153	0.00399281
KRT74	Chr5	27487719	27496237	8518	34	0.00399155
METAP1	Chr6	26925347	26979063	53716	214	0.00398392
CCL22	Chr18	25446366	25454407	8041	32	0.0039796
GSG1L	Chr25	25599907	25852495	252588	1005	0.00397881
RHOBTB1	Chr28	16729033	16802909	73876	293	0.00396611
ARNTL2	Chr5	82874246	82964983	90737	359	0.00395649
MMP20	Chr15	6278370	6336541	58171	230	0.00395386
MEF2A	Chr21	7045097	7225412	180315	704	0.00390428
36951	Chr6	1947846	2082068	134222	519	0.00386673
ARHGAP10	Chr17	10182662	10560361	377699	1454	0.00384963
PKN2	Chr3	55231809	55365736	133927	513	0.00383044
GUCY1A2	Chr15	16604380	17100655	496275	1899	0.00382651
NCAM1	Chr15	23807380	24165753	358373	1369	0.00382004
TPRG1	Chr1	78604072	78758431	154359	584	0.00378339
CALCRL	Chr2	8901431	9030990	129559	490	0.00378206
ESD	Chr12	16771117	16788845	17728	67	0.00377933
SLC25A27	Chr23	19860593	19882824	22231	84	0.00377851
DGKE	Chr19	7875200	7899782	24582	92	0.00374258
XRCC4	Chr7	85267806	85556934	289128	1082	0.00374229
CAPN1	Chr29	44063462	44089990	26528	99	0.00373191
LRRC1	Chr23	6529132	6666336	137204	512	0.00373167
KCNB2	Chr14	37990750	38454479	463729	1726	0.003722
C2	Chr23	27231725	27243367	11642	43	0.00369352
USP47	Chr15	41297353	41402927	105574	389	0.00368462
TSEN15	Chr16	66581061	66610926	29865	110	0.00368324
MAPRE2	Chr24	22190113	22306884	116771	426	0.00364817
SLIT2	Chr6	41236269	41642320	406051	1480	0.00364486
MBNL2	Chr12	78283459	78445752	162293	591	0.00364156
GTPBP8	Chr1	58152816	58166586	13770	50	0.00363108
CALCRL	Chr2	8901431	9030990	129559	469	0.00361997
NATD1	Chr19	35831271	35838757	7486	27	0.00360673
CNIH3	Chr16	28441399	28580589	139190	502	0.00360658
CDK14	Chr4	7844073	8440697	596624	2144	0.00359355
TMEM106B	Chr4	19893088	19915667	22579	81	0.0035874
CYP2C87	Chr26	16030291	16065395	35104	125	0.00356085
DPYS	Chr14	62328131	62418497	90366	320	0.00354115
OLFM3	Chr3	41420908	41642411	221503	782	0.00353043
PLD5	Chr16	35207144	35635140	427996	1490	0.00348134
GRM1	Chr9	84394785	84818562	423777	1472	0.00347352
NPAS2	Chr11	5877438	6001775	124337	430	0.00345834
E2F6	Chr11	86346273	86368608	22335	77	0.0034475
RBM20	Chr26	31465603	31678528	212925	731	0.00343313
TSPAN4	Chr29	50560711	50570675	9964	34	0.00341228
FSHR	Chr11	31110743	31305197	194454	663	0.00340955
FER	Chr7	110465381	110864228	398847	1358	0.00340481
ERAP2	Chr7	98715724	98767730	52006	177	0.00340345
GPR158	Chr13	26229726	26526550	296824	1009	0.00339932
TMEM63B	Chr23	17658117	17798270	140153	470	0.00335348
SBF2	Chr15	42970966	43482359	511393	1692	0.00330861
DDR2	Chr3	6672015	6847222	175207	571	0.003259
SBF2	Chr15	42970966	43482359	511393	1664	0.00325386
SI	Chr1	103088852	103204728	115876	377	0.00325348
EPHA3	Chr1	36715182	37123463	408281	1327	0.00325021
CDH12	Chr20	51282706	51624351	341645	1107	0.00324021
SYT10	Chr5	76692597	76808969	116372	376	0.00323102
KCNMA1	Chr28	32824639	33588126	763487	2429	0.00318146
IGSF3	Chr3	26691949	26817441	125492	398	0.00317152
MANBA	Chr6	23390301	23541419	151118	479	0.00316971
NOS1AP	Chr3	7121478	7463616	342138	1082	0.00316247
ATXN7L1	Chr4	47106927	47228658	121731	384	0.0031545
PM20D2	Chr9	61848878	61861891	13013	41	0.0031507
BOLA-DOA	Chr23	7218684	7264231	45547	143	0.00313961
GPR158	Chr13	26229726	26526550	296824	927	0.00312306
ROBO1	Chr1	25619014	26210307	591293	1846	0.00312197
MRVI1	Chr15	42548670	42674631	125961	393	0.00312001
TSPAN4	Chr29	50560711	50570675	9964	31	0.0031112
MRVI1	Chr15	42548307	42674631	126324	393	0.00311105
C20H5orf22	Chr20	42044890	42060655	15765	49	0.00310815
ESR2	Chr10	76707921	76757370	49449	153	0.0030941
CCDC67	Chr29	1379816	1532729	152913	473	0.00309326
IL1RAP	Chr1	77223041	77343645	120604	372	0.00308447
CYB561A3	Chr29	40551220	40562584	11364	35	0.0030799
CHRDL2	Chr15	54785593	54819151	33558	103	0.00306931
RAB14	Chr8	112500261	112512345	12084	37	0.0030619
PLXDC2	Chr13	21595580	22015325	419745	1284	0.003059
LIN7A	Chr5	10409386	10566010	156624	479	0.00305828
NLRP5	Chr18	63668486	63683296	14810	45	0.00303849
ELAC2	Chr19	31965967	31982771	16804	51	0.00303499
SUCLG2	Chr22	33977329	34251730	274401	828	0.00301748
NSL1	Chr16	72664763	72701054	36291	109	0.0030035
SAMD5	Chr9	85917824	86020619	102795	305	0.00296707
ULBP17	Chr9	88231932	88402262	170330	505	0.00296483
RAET1G	Chr9	88231932	88402262	170330	505	0.00296483
EPHA3	Chr1	36715182	37123463	408281	1207	0.0029563
EPHB2	Chr2	130498485	130852033	353548	1045	0.00295575
COPS4	Chr6	99610791	99649396	38605	114	0.00295299
ZMYND8	Chr13	76501072	76616233	115161	339	0.0029437
KANK3	Chr7	18200290	18210847	10557	31	0.00293644
KIF2C	Chr3	101832363	101851108	18745	55	0.00293412
PIK3C2G	Chr5	91835142	92276939	441797	1295	0.00293121
GPD2	Chr2	39765203	39912916	147713	428	0.00289751
MRPS33	Chr4	105101879	105110529	8650	25	0.00289017
CYB5R4	Chr9	66377195	66503206	126011	364	0.00288864
MACROD2	Chr13	7697329	10043273	2345944	6772	0.00288668
ZNF385B	Chr2	17084638	17449868	365230	1052	0.00288038
DUSP10	Chr16	25895748	25936856	41108	118	0.00287049
PIPOX	Chr19	20964784	20978424	13640	39	0.00285924
PRPF6	Chr13	54308645	54343470	34825	99	0.00284279
UBR2	Chr23	16264296	16370157	105861	300	0.0028339
SLC25A21	Chr21	47309279	47831840	522561	1474	0.00282072
NXF3	ChrX	56366627	56468170	101543	285	0.00280669
MRPS35	Chr5	82486884	82530466	43582	122	0.00279932
PPP1R1C	Chr2	14502889	14623643	120754	335	0.00277424
HSD11B1	Chr16	75463611	75508770	45159	123	0.00272371
UNG	Chr17	66221122	66231818	10696	29	0.00271129
ARG1	Chr9	70499607	70516610	17003	46	0.0027054
DBH	Chr11	104554823	104572619	17796	48	0.00269724
TRPM7	Chr10	59833269	59943305	110036	296	0.00269003
GRAMD3	Chr7	28657268	28732921	75653	203	0.0026833
NDST3	Chr6	8124490	8251738	127248	341	0.00267981
CCDC37	Chr22	61319020	61344877	25857	69	0.00266852
HIAT1	Chr3	43332800	43386388	53588	143	0.00266851
IAH1	Chr11	87942469	87953717	11248	30	0.00266714
EBF1	Chr7	72394109	72804182	410073	1092	0.00266294
PRNP	Chr13	47400391	47418507	18116	48	0.00264959
PRNP	Chr13	47400391	47418507	18116	48	0.00264959
PRNP	Chr13	47400391	47418507	18116	48	0.00264959
BOLA	Chr23	28330911	28506282	175371	464	0.00264582
ASCC3	Chr9	49714501	50103401	388900	1028	0.00264335
LOC509810	Chr18	65197725	65211384	13659	36	0.00263562
BRINP3	Chr16	15776863	16267370	490507	1290	0.00262993
DPH5	Chr3	42408613	42448921	40308	106	0.00262975
GPC6	Chr12	68231886	68741353	509467	1339	0.00262824
WC1-12	Chr5	102671252	102729582	58330	153	0.00262301
RNLS	Chr26	9932076	10211164	279088	731	0.00261925
ABCA1	Chr8	96274034	96390357	116323	303	0.00260482
LPPR1	Chr8	92346241	92674692	328451	854	0.00260008
NAF1	Chr6	2602608	2653029	50421	131	0.00259812
RGS7	Chr16	36194595	36695721	501126	1298	0.00259017
FRMD8	Chr29	44248434	44269693	21259	55	0.00258714
F13B	Chr16	77848140	77869023	20883	54	0.00258584
SWAP70	Chr15	43509668	43585976	76308	197	0.00258164
MBTD1	Chr19	36142461	36207184	64723	167	0.00258023
ARFIP1	Chr17	4732240	4868678	136438	352	0.00257993
SLC5A7	Chr11	44876758	44897731	20973	54	0.00257474
ZNF398	Chr4	113049663	113072673	23010	59	0.0025641
ACSM1	Chr25	18349701	18413889	64188	164	0.00255499
BOLA	Chr23	28330911	28506282	175371	448	0.00255458
VOPP1	Chr22	495505	677104	181599	463	0.00254957
VSX2	Chr10	85992306	86011537	19231	49	0.00254797
ZDHHC6	Chr26	33238810	33253738	14928	38	0.00254555
ZNF335	Chr13	75416912	75435377	18465	47	0.00254536
CCDC112	Chr10	4055252	4085539	30287	77	0.00254234
LMX1A	Chr3	3692342	3865786	173444	439	0.00253108
UPP2	Chr2	38326895	38363855	36960	93	0.00251623
NECAB2	Chr18	10316498	10350464	33966	85	0.0025025
RGS17	Chr9	91104615	91353966	249351	623	0.00249849
ZNF335	Chr13	75416912	75435377	18465	46	0.0024912
TM7SF3	Chr5	83206161	83245951	39790	99	0.00248806
DDOST	Chr2	132587723	132600988	13265	33	0.00248775
LOC751562	Chr23	34386962	34491996	105034	261	0.00248491
DLGAP5	Chr10	67863305	67908834	45529	113	0.00248193
KLHL29	Chr11	75290643	75623195	332552	824	0.00247781
ERG	Chr1	152379402	152515109	135707	335	0.00246855
YPEL5	Chr11	69688035	69702229	14194	35	0.00246583
NUPL2	Chr4	31962276	31977779	15503	38	0.00245114
SPERT	Chr12	15820184	15832442	12258	30	0.00244738
FBXW8	Chr17	60338263	60396367	58104	142	0.00244389
CNTNAP3	Chr8	66382782	66574167	191385	466	0.00243488
SLC2A13	Chr5	41062651	41559936	497285	1208	0.00242919
CASP4	Chr15	3474705	3494170	19465	47	0.00241459
FGF6	Chr5	106157908	106169922	12014	29	0.00241385
SERPINB5	Chr24	62248908	62271054	22146	53	0.00239321
CNOT8	Chr7	68039857	68057466	17609	42	0.00238514
NPTN	Chr10	20205929	20270508	64579	154	0.00238468
SPAG5	Chr19	20592271	20611224	18953	45	0.00237429
DGKB	Chr4	22333432	23127587	794155	1874	0.00235974
NXF3	ChrX	56352217	56473249	121032	285	0.00235475
CYFIP2	Chr7	71003539	71116486	112947	265	0.00234623
OVGP1	Chr3	32047398	32059347	11949	28	0.00234329
CCDC9	Chr18	54707620	54718294	10674	25	0.00234214
TARP	Chr4	50778373	50799331	20958	49	0.00233801
PARK2	Chr9	98421509	99648791	1227282	2864	0.00233361
NUBPL	Chr21	42475715	42719201	243486	567	0.00232868
MBP	Chr24	2485675	2590650	104975	244	0.00232436
CA2	Chr14	79372236	79388592	16356	38	0.00232331
HMCN1	Chr16	68192900	68733392	540492	1254	0.00232011
DDR2	Chr3	6672015	6847222	175207	406	0.00231726
RNF130	Chr7	1082594	1226409	143815	332	0.00230852
ACTG2	Chr11	10717557	10740084	22527	52	0.00230834
CHST9	Chr24	30037088	30315707	278619	643	0.00230781
BUB1	Chr11	1559189	1592166	32977	76	0.00230464
PISD	Chr17	72425904	72453284	27380	63	0.00230095
SLC24A2	Chr8	24497952	24778056	280104	643	0.00229558
NEGR1	Chr3	73111653	74147063	1035410	2364	0.00228315
DRG1	Chr17	72273493	72288389	14896	34	0.00228249
ERICH5	Chr14	68428888	68454310	25422	58	0.00228149
CHORDC1	Chr29	5035801	5057737	21936	50	0.00227936
GGPS1	Chr28	8111376	8123253	11877	27	0.0022733
SORCS1	Chr26	27810197	28389391	579194	1316	0.00227212
CHEK2	Chr17	70269591	70305247	35656	80	0.00224366
AXIN2	Chr19	62834851	62860774	25923	58	0.0022374
ACBD3	Chr16	29911423	29949907	38484	86	0.00223469
GPM6A	Chr27	6265765	6417208	151443	337	0.00222526
ADAM3A	Chr27	34367776	34483222	115446	256	0.00221749
UNC13C	Chr10	55715816	56410341	694525	1540	0.00221734
GABRG2	Chr7	75895255	76022776	127521	282	0.0022114
KLHL1	Chr12	44295887	44823477	527590	1163	0.00220436
IL1R1	Chr11	6848041	6931607	83566	184	0.00220185
GALNS	Chr18	14061155	14077096	15941	35	0.0021956
METTL14	Chr6	7797198	7837774	40576	89	0.00219341
TSPAN8	Chr5	790666	857389	66723	146	0.00218815
LIPM	Chr26	10520635	10540833	20198	44	0.00217843
PXDC1	Chr23	50077252	50095625	18373	40	0.00217711
SCFD2	Chr6	70187885	70585267	397382	865	0.00217675
PLA2G2F	Chr2	133111280	133124161	12881	28	0.00217374
FYTTD1	Chr1	70954510	70984201	29691	64	0.00215554
FAM20B	Chr16	61810680	61847803	37123	80	0.002155
RBFOX1	Chr25	5417263	6686802	1269539	2733	0.00215275
IGLL1	Chr17	72826683	73152860	326177	701	0.00214914
ENTPD4	Chr8	71430480	71457015	26535	57	0.00214811
PDE1A	Chr2	14175609	14483437	307828	661	0.0021473
SYN1	ChrX	91191331	91437203	245872	527	0.00214339
MERTK	Chr11	332457	474293	141836	304	0.00214332
C2H2orf80	Chr2	96867512	96890885	23373	50	0.00213922
AOAH	Chr4	60940662	61125665	185003	395	0.0021351
MYRFL	Chr5	43746452	43872342	125890	268	0.00212884
NUP133	Chr28	428855	483827	54972	117	0.00212836
WIPI2	Chr25	39565709	39589412	23703	50	0.00210944
KLHL1	Chr12	44295887	44823477	527590	1109	0.00210201
DHX9	Chr16	65379389	65420803	41414	87	0.00210074
SAXO1	Chr8	25210483	25319684	109201	229	0.00209705
DIABLO	Chr17	55400570	55418224	17654	37	0.00209584
LRRC61	Chr4	113551698	113564130	12432	26	0.00209138
ODZ3	Chr27	12356854	12810551	453697	947	0.0020873
BANP	Chr18	13425370	13493935	68565	143	0.00208561
KLHL29	Chr11	75290643	75623195	332552	693	0.00208388
FAM19A1	Chr22	33081564	33591957	510393	1063	0.00208271
RNASEH2B	Chr12	20417679	20480648	62969	131	0.00208039
FADS6	Chr19	57141971	57157896	15925	33	0.00207221
GCK	Chr4	77820948	77857152	36204	75	0.00207159
LOC509513	Chr4	106638734	106904802	266068	551	0.0020709
PPM1L	Chr1	107240576	107576169	335593	694	0.00206798
AP3D1	Chr7	22709433	22743787	34354	71	0.00206672
SEMA4A	Chr3	14659268	14679216	19948	41	0.00205534
PI4K2B	Chr6	46355299	46391446	36147	74	0.0020472
NGEF	Chr3	113218911	113266319	47408	97	0.00204607
ZYG11A	Chr3	94049250	94111032	61782	126	0.00203943
SERPINB5	Chr24	62248908	62271054	22146	45	0.00203197
GCLM	Chr3	49741374	49759101	17727	36	0.0020308
C8H9orf24	Chr8	77089023	77103429	14406	29	0.00201305
ITIH2	Chr13	16217715	16250004	32289	64	0.0019821
CRAMP1L	Chr25	1245668	1284542	38874	77	0.00198076
VPS41	Chr4	82705581	82896816	191235	378	0.00197663
STS	ChrX	146611849	146751829	139980	276	0.00197171
CSNK2A2	Chr18	26098512	26132553	34041	67	0.00196821
BPIFB5	Chr13	63311350	63329709	18359	36	0.00196089
TSC22D2	Chr1	118612163	118657811	45648	89	0.0019497
DBN1	Chr7	40312120	40325975	13855	27	0.00194875
THRAP3	Chr3	110135909	110208496	72587	141	0.0019425
GPNMB	Chr4	32010891	32037151	26260	51	0.00194212
SKIL	Chr1	97823538	97843625	20087	39	0.00194155
DPYSL5	Chr11	72671398	72760767	89369	173	0.00193579
NOS2	Chr19	19758763	19956549	197786	382	0.00193138
SLC24A2	Chr8	24497952	24778056	280104	539	0.00192429
PPIL1	Chr23	10748953	10769296	20343	39	0.00191712
PRKRIR	Chr15	56543032	56571783	28751	55	0.00191298
EVC2	Chr6	105291555	105451674	160119	305	0.00190483
CCNC	Chr9	50920351	50946139	25788	49	0.00190011
FSTL5	Chr17	37149471	38027600	878129	1665	0.00189608
FRMD4A	Chr13	28631454	28961637	330183	626	0.00189592
SLC25A27	Chr23	19860593	19882824	22231	42	0.00188925
ATG7	Chr22	55944218	56217921	273703	516	0.00188526
TBC1D4	Chr12	50677975	50888598	210623	397	0.00188488
DNM2	Chr7	16465942	16523297	57355	108	0.00188301
TSPAN16	Chr7	16931821	16950982	19161	36	0.00187882
HNRNPC	Chr10	25936104	25980840	44736	84	0.00187768
HS6ST3	Chr12	77227237	77947529	720292	1352	0.00187702
NUDCD1	Chr14	57249476	57342026	92550	173	0.00186926
DIP2B	Chr5	29347732	29579488	231756	431	0.00185971
B4GALT1	Chr8	76179279	76232552	53273	99	0.00185835
CSNK2A2	Chr18	26098512	26132553	34041	63	0.00185071
CLCN7	Chr25	1135568	1156102	20534	38	0.00185059
NME7	Chr16	37593774	37838172	244398	452	0.00184944
AP3B1	Chr10	9040250	9300567	260317	477	0.00183238
DHX35	Chr13	68399157	68468557	69400	127	0.00182997
ARHGEF10L	Chr2	135557021	135672134	115113	210	0.00182429
CAMKMT	Chr11	26602907	27032984	430077	782	0.00181828
FA2H	Chr18	2183490	2237316	53826	97	0.0018021
MAP4	Chr22	52369973	52462511	92538	166	0.00179386
ARSG	Chr19	62368394	62401914	33520	60	0.00178998
ZYG11B	Chr3	94123284	94197896	74612	132	0.00176915
RPH3AL	Chr19	22872041	23011336	139295	246	0.00176604
EYA3	Chr2	125899098	125970014	70916	125	0.00176265
CCDC141	Chr2	17791921	18014350	222429	392	0.00176236
SYT11	Chr3	14926782	14946170	19388	34	0.00175366
MBTPS1	Chr18	10392422	10427784	35362	62	0.00175329
KIFC1	Chr23	7512779	7527615	14836	26	0.00175249
AHCYL2	Chr4	93956615	94148561	191946	335	0.00174528
TBX4	Chr19	11865526	11891936	26410	46	0.00174176
NCAPH	Chr11	2401654	2435806	34152	59	0.00172757
ITPR2	Chr5	83398940	83986145	587205	1012	0.00172342
CCDC77	Chr5	107796084	107822807	26723	46	0.00172136
RAP2A	Chr12	78507682	78546608	38926	67	0.00172121
CRISP1	Chr23	22245232	22261583	16351	28	0.00171243
BTN1A1	Chr23	31342498	31373025	30527	52	0.00170341
DAGLB	Chr25	38842835	38866581	23746	40	0.00168449
C8A	Chr3	89797012	89869019	72007	121	0.00168039
NELL2	Chr5	35657328	36042698	385370	647	0.00167891
MARCH7	Chr2	36682214	36729906	47692	80	0.00167743
B3GAT2	Chr9	10202747	10301176	98429	165	0.00167634
F13B	Chr16	77848140	77869023	20883	35	0.001676
ADAM32	Chr27	33900737	34076024	175287	293	0.00167154
OLFM2	Chr7	15549856	15749802	199946	333	0.00166545
SLIT3	Chr20	324338	1051861	727523	1210	0.00166318
KPNA1	Chr1	67476504	67545097	68593	114	0.00166198
UBOX5	Chr13	52501258	52548992	47734	79	0.001655
MMP16	Chr14	76757694	77111545	353851	582	0.00164476
GALNT15	Chr1	154923158	154969397	46239	76	0.00164363
OXNAD1	Chr1	155017756	155158936	141180	230	0.00162913
SRGAP1	Chr5	49812075	50118860	306785	499	0.00162655
SMYD3	Chr16	31589363	32333420	744057	1209	0.00162488
DPP10	Chr2	67307817	68111289	803472	1304	0.00162296
NRF1	Chr4	94264902	94359401	94499	152	0.00160848
MTPN	Chr4	100550305	100626568	76263	122	0.00159973
OTOG	Chr15	35408515	35496661	88146	141	0.00159962
SNX29	Chr25	10743975	11273963	529988	846	0.00159626
ME1	Chr9	23400883	23590196	189313	300	0.00158468
PCMTD2	Chr13	54123571	54142541	18970	30	0.00158144
LRIG3	Chr5	54884393	54936361	51968	82	0.00157789
SATB2	Chr2	88248732	88455549	206817	326	0.00157627
ATG7	Chr22	55944218	56217921	273703	431	0.0015747
ZUFSP	Chr9	34364850	34389670	24820	39	0.00157131
ALS2CR11	Chr2	90461665	90585163	123498	193	0.00156278
SMO	Chr4	93922580	93946896	24316	38	0.00156276
ASPM	Chr16	77923517	77988157	64640	101	0.0015625
THSD4	Chr10	18376581	18574452	197871	309	0.00156162
42248	Chr3	57292920	57328211	35291	55	0.00155847
GRM7	Chr22	18701583	19647970	946387	1473	0.00155645
WDR48	Chr22	12416918	12469483	52565	81	0.00154095
CFH	Chr16	5486704	6172566	685862	1054	0.00153675
ELMO1	Chr4	60356209	60838995	482786	738	0.00152863
RBM47	Chr6	61034008	61311429	277421	424	0.00152836
ASCC2	Chr17	71057876	71093872	35996	55	0.00152795
RALYL	Chr14	80029572	80865916	836344	1273	0.0015221
MAP3K8	Chr13	35600312	35626616	26304	40	0.00152068
BRI3BP	Chr17	53067552	53088676	21124	32	0.00151486
ATXN7L1	Chr4	46974636	47228658	254022	384	0.00151168
RAB3B	Chr3	94917405	94985344	67939	102	0.00150135
SAMSN1	Chr1	22123654	22181827	58173	87	0.00149554
AKT3	Chr16	34132647	34404652	272005	406	0.00149262
TNFRSF11B	Chr14	47432902	47461081	28179	42	0.00149047
MIR2285F-1	ChrX	6552538	6933324	380786	566	0.0014864
NOSTRIN	Chr2	27317637	27380506	62869	93	0.00147927
GRIA4	Chr15	2114095	2719504	605409	890	0.00147008
CYB5B	Chr18	36674603	36696378	21775	32	0.00146958
IL7	Chr14	44097777	44187672	89895	132	0.00146838
VWC2L	Chr2	102927401	103134122	206721	301	0.00145607
C8H9orf72	Chr8	16694706	16714705	19999	29	0.00145007
EDA	ChrX	85708002	86099973	391971	568	0.00144909
STX3	Chr15	84312813	84376042	63229	91	0.00143921
EXOC1	Chr6	72512586	72989476	476890	684	0.00143429
NTNG1	Chr3	35969785	36337030	367245	522	0.00142139
SLC3A2	Chr29	41855870	41896761	40891	58	0.00141841
LSAMP	Chr1	61026445	61780987	754542	1070	0.00141808
SLC35F3	Chr28	6762321	7196921	434600	614	0.00141279
ZNF629	Chr25	27158932	27181608	22676	32	0.00141118
CFAP97	Chr27	14553983	14579529	25546	36	0.00140922
PRKCE	Chr11	27934970	28475775	540805	761	0.00140716
TNFRSF10D	Chr8	71111761	71212279	100518	141	0.00140273
UNC13C	Chr10	55715816	56410341	694525	973	0.00140096
IDH1	Chr2	96941045	96962496	21451	30	0.00139854
ULBP17	Chr9	88231932	88402262	170330	238	0.00139729
RAET1G	Chr9	88231932	88402262	170330	238	0.00139729
DCAF12	Chr8	76828792	76868169	39377	55	0.00139675
NRXN3	Chr10	91597566	92224180	626614	869	0.00138682
FAH	Chr21	26610000	26643315	33315	46	0.00138076
DGKB	Chr4	22333432	23127587	794155	1096	0.00138008
BCL2	Chr24	61914151	62105526	191375	264	0.00137949
AK7	Chr21	62895824	62964704	68880	95	0.00137921
MMS19	Chr26	18538603	18574304	35701	49	0.00137251
SGPL1	Chr28	27133425	27185947	52522	72	0.00137085
PLCB1	Chr13	789367	1695916	906549	1242	0.00137003
TMX3	Chr24	8748240	8785476	37236	51	0.00136964
PSEN2	Chr16	30596048	30622407	26359	36	0.00136576
FMO1	Chr16	39666847	39706456	39609	54	0.00136333
B4GALT4	Chr1	64614355	64645167	30812	42	0.00136311
SLC6A4	Chr19	21851878	21872423	20545	28	0.00136286
DBT	Chr3	43189912	43230271	40359	55	0.00136277
STYK1	Chr5	99407005	99439453	32448	44	0.00135602
FBXO3	Chr15	65186334	65219692	33358	45	0.001349
SENP7	Chr1	46162636	46317067	154431	208	0.00134688
IL20RB	Chr1	133269142	133310063	40921	55	0.00134405
ZFAND6	Chr21	26543767	26591581	47814	64	0.00133852
SIPA1L2	Chr28	5250005	5367946	117941	157	0.00133117
PTPRZ1	Chr4	87077522	87295626	218104	289	0.00132506
CSNK1G2	Chr7	45862607	45888278	25671	34	0.00132445
KALRN	Chr1	69105207	69724961	619754	819	0.00132149
EPHA3	Chr1	36715182	37123463	408281	539	0.00132017
FAM13C	Chr28	14999854	15136823	136969	180	0.00131417
HERC6	Chr6	37736137	37793279	57142	75	0.00131252
TRAF3IP3	Chr16	75426163	75446749	20586	27	0.00131157
LOC534742	Chr3	35152468	35210448	57980	76	0.0013108
CCSER1	Chr6	35100698	35938394	837696	1098	0.00131074
FAT3	Chr29	1965868	2605170	639302	832	0.00130142
DTNA	Chr24	22445690	22767026	321336	415	0.00129148
MYO1B	Chr2	80166216	80369681	203465	261	0.00128278
BBS9	Chr4	63649807	64105542	455735	583	0.00127925
FSD2	Chr21	23501225	23523968	22743	29	0.00127512
SFXN5	Chr11	11360394	11490612	130218	166	0.00127479
MRPS28	Chr14	45279166	45491347	212181	270	0.0012725
GULO	Chr8	75984695	76010700	26005	33	0.00126899
TNFRSF19	Chr12	34673861	34757696	83835	106	0.00126439
F11R	Chr3	8483557	8508123	24566	31	0.00126191
MEGF10	Chr7	27820354	27998816	178462	225	0.00126077
XKR6	Chr8	7983847	8255452	271605	342	0.00125918
SLC9B2	Chr6	23096103	23178027	81924	103	0.00125726
TFEC	Chr4	52589573	52812810	223237	280	0.00125427
FOLH1B	Chr29	5904660	5977332	72672	91	0.0012522
AAMDC	Chr29	18250500	18284060	33560	42	0.00125149
PRKG1	Chr26	6905321	8343635	1438314	1794	0.00124729
ITFG1	Chr18	15625547	15928962	303415	378	0.00124582
PLSCR4	Chr1	123231175	123273106	41931	52	0.00124013
SLC5A10	Chr19	34817326	34872403	55077	68	0.00123464
ADAM12	Chr26	45848825	46238138	389313	480	0.00123294
FANCM	Chr21	55336793	55395266	58473	72	0.00123134
DPYSL3	Chr7	60588656	60703487	114831	141	0.00122789
GRIN3A	Chr8	92944702	93145524	200822	246	0.00122497
CEP162	Chr9	66115461	66211054	95593	117	0.00122394
INADL	Chr3	84099550	84479737	380187	465	0.00122308
CD5L	Chr3	12569319	12606964	37645	46	0.00122194
PTPRE	Chr26	47801388	47843307	41919	51	0.00121663
C24H18orf8	Chr24	33485127	33507329	22202	27	0.00121611
RINT1	Chr4	46919801	46943667	23866	29	0.00121512
GRM7	Chr22	18701583	19647970	946387	1149	0.00121409
OTULIN	Chr20	58563063	58596022	32959	40	0.00121363
LRRC7	Chr3	75355802	75744768	388966	471	0.0012109
GRM7	Chr22	18701583	19647970	946387	1144	0.00120881
40603	Chr20	57027981	57145663	117682	142	0.00120664
SOX5	Chr5	86571272	87036289	465017	561	0.00120641
RGS17	Chr9	91104615	91353966	249351	300	0.00120312
CDH13	Chr18	9189534	10164197	974663	1169	0.00119939
ASIC2	Chr19	16353061	17563070	1210009	1451	0.00119916
COL18A1	Chr1	146989202	147041013	51811	62	0.00119666
PADI2	Chr2	136049643	136098119	48476	58	0.00119647
LRRC28	Chr21	7411024	7600816	189792	227	0.00119605
IFT80	Chr1	107936922	108059854	122932	147	0.00119578
ACSM2B	Chr25	18277524	18326154	48630	58	0.00119268
TBK1	Chr5	49502463	49542968	40505	48	0.00118504
THUMPD2	Chr11	22066099	22109204	43105	51	0.00118316
TMCO1	Chr3	3166688	3222623	55935	66	0.00117994
CSF2RB	Chr5	75724619	75745819	21200	25	0.00117925
PPP3CA	Chr6	24812738	25136267	323529	381	0.00117764
TMEM144	Chr17	41671501	41719161	47660	56	0.00117499
CCDC83	Chr29	9706415	9758502	52087	61	0.00117112
ACOX2	Chr22	43379503	43410316	30813	36	0.00116834
RPS6KA2	Chr9	102918981	103074109	155128	181	0.00116678
40603	Chr20	57027981	57145663	117682	137	0.00116415
BMPR2	Chr2	91280846	91468320	187474	218	0.00116283
KLHL1	Chr12	44295887	44823477	527590	613	0.00116189
TRAF3IP3	Chr16	75423474	75446749	23275	27	0.00116004
IL1R2	Chr11	6721484	6757779	36295	42	0.00115718
TCP11L1	Chr15	64480781	64510275	29494	34	0.00115278
B3GALNT2	Chr28	8232075	8297594	65519	75	0.00114471
ILKAP	Chr3	118134022	118158557	24535	28	0.00114123
CA10	Chr19	626244	1473294	847050	966	0.00114043
BMP8A	Chr3	107133807	107174162	40355	46	0.00113988
ZMAT4	Chr27	35241285	35618997	377712	430	0.00113843
MCM6	Chr2	61821929	61856346	34417	39	0.00113316
C17H4orf29	Chr17	30106648	30133147	26499	30	0.00113212
OPTN	Chr13	28078761	28117629	38868	44	0.00113204
LIPA	Chr26	10988283	11030717	42434	48	0.00113117
SLC25A21	Chr21	47309279	47831840	522561	590	0.00112905
CLPTM1	Chr18	53066527	53093157	26630	30	0.00112655
WSCD1	Chr19	26253579	26296311	42732	48	0.00112328
SYBU	Chr14	56953458	56997971	44513	50	0.00112327
TTYH2	Chr19	57793546	57829254	35708	40	0.0011202
TRAPPC12	Chr8	112962792	113085992	123200	138	0.00112013
CLCN1	Chr4	107518110	107554736	36626	41	0.00111942
ZMAT3	Chr1	88632286	88663999	31713	35	0.00110365
MB21D2	Chr1	75101222	75222153	120931	133	0.0010998
ANGPT1	Chr14	59136609	59436688	300079	328	0.00109305
PLXNA4	Chr4	96581219	97047201	465982	507	0.00108802
RNF32	Chr4	118895446	118932266	36820	40	0.00108637
CDH13	Chr18	9189534	10164197	974663	1058	0.0010855
USP30	Chr17	66239944	66263958	24014	26	0.0010827
IFRD2	Chr22	50610661	50637639	26978	29	0.00107495
BCL2L11	Chr11	1156935	1199790	42855	46	0.00107339
HS6ST3	Chr12	77227237	77947529	720292	773	0.00107318
CRHR2	Chr4	66062160	66090181	28021	30	0.00107063
FAM120B	Chr9	105530204	105597625	67421	72	0.00106792
OTOG	Chr15	35408515	35496661	88146	94	0.00106641
ASIC2	Chr19	16353061	17563070	1210009	1290	0.00106611
NOS1AP	Chr3	7121478	7463616	342138	363	0.00106098
DNAL1	Chr10	85467721	85504544	36823	39	0.00105912
SLC9A9	Chr1	126040088	126704343	664255	703	0.00105833
ANO4	Chr5	65012099	65361831	349732	369	0.00105509
NCAPH	Chr11	2401654	2435806	34152	36	0.00105411
UXS1	Chr11	45583100	45640370	57270	60	0.00104767
LARP4	Chr5	29604410	29670495	66085	69	0.00104411
DNAJC10	Chr2	13825853	13873784	47931	50	0.00104317
SLC7A6	Chr18	35763842	35794542	30700	32	0.00104235
DRAM2	Chr3	32376401	32404450	28049	29	0.0010339
C3H1orf228	Chr3	101876646	101939033	62387	64	0.00102585
SPINT2	Chr18	48295521	48326737	31216	32	0.00102512
TTL	Chr11	46073890	46107247	33357	34	0.00101928
EXOC1	Chr6	72512586	72989476	476890	486	0.0010191
KIAA0430	Chr25	14136371	14175801	39430	40	0.00101446
COL8A1	Chr1	43541935	43717620	175685	178	0.00101318
ASAP3	Chr2	129969268	130013690	44422	45	0.00101301
RNGTT	Chr9	61993720	62225106	231386	234	0.0010113
ERI3	Chr3	102290328	102421172	130844	132	0.00100883
ERI3	Chr3	102290313	102421171	130858	132	0.00100873
CCDC37	Chr22	61319020	61344877	25857	26	0.00100553
ZNF423	Chr18	18041275	18392204	350929	351	0.0010002
PALMD	Chr3	43688096	43748131	60035	60	0.000999417
TMCC1	Chr22	56700644	56742875	42231	42	0.00099453
ANGPT2	Chr27	4422696	4481033	58337	58	0.000994223
EFHB	Chr1	44647583	44712979	65396	65	0.000993945
FOXN3	Chr10	101891647	102300271	408624	406	0.000993578
TMCC2	Chr16	2836965	2875240	38275	38	0.000992815
LASP1	Chr19	40090994	40131374	40380	40	0.000990589
DGKB	Chr4	22333432	23127587	794155	784	0.000987213
URB1	Chr1	2382872	2459950	77078	76	0.000986014
ADD2	Chr11	13698134	13755250	57116	56	0.000980461
MED15	Chr17	74425041	74490537	65496	64	0.000977159
STXBP4	Chr19	5316761	5516685	199924	195	0.000975371
PLXNA4	Chr4	96581219	97047201	465982	454	0.000974287
PPP1R3A	Chr4	54866420	54906486	40066	39	0.000973394
CRB1	Chr16	78094757	78320235	225478	219	0.00097127
BARD1	Chr2	103278271	103371020	92749	90	0.000970361
MMS22L	Chr9	53228693	53352399	123706	120	0.000970042
LOC509513	Chr4	106638734	106904802	266068	258	0.000969677
MGLL	Chr22	60408904	60495755	86851	84	0.000967174
COL18A1	Chr1	146989202	147041013	51811	50	0.000965046
ADCY1	Chr4	76869664	76969459	99795	96	0.000961972
RNF111	Chr10	51288676	51380159	91483	88	0.000961927
BIRC6	Chr11	14979930	15194115	214185	206	0.000961785
36951	Chr6	1947846	2082068	134222	129	0.000961094
RAB8B	Chr10	46837289	46907334	70045	67	0.000956528
FAM135B	Chr14	5423555	5657245	233690	222	0.000949976
HNF4G	Chr14	40936274	40965787	29513	28	0.000948734
LARP7	Chr6	14135992	14170818	34826	33	0.000947568
FAM19A1	Chr22	33081564	33591957	510393	481	0.000942411
QRFPR	Chr6	4093247	4152761	59514	56	0.000940955
AK5	Chr3	67354497	67614628	260131	244	0.000937989
CCDC77	Chr5	107796084	107822807	26723	25	0.000935524
RALGPS2	Chr16	61559976	61719616	159640	149	0.00093335
KIAA0226L	Chr12	16418087	16456993	38906	36	0.000925307
SLC18A2	Chr26	37895866	37936014	40148	37	0.00092159
SLC35F3	Chr28	6762321	7196921	434600	400	0.000920387
RANBP3	Chr7	19640260	19691069	50809	46	0.000905351
MKLN1	Chr4	95807760	96016758	208998	189	0.000904315
C3H1orf141	Chr3	78516233	78562680	46447	42	0.000904256
TRPC3	Chr17	36566053	36616303	50250	45	0.000895522
UNC5D	Chr27	30421576	31075903	654327	585	0.000894048
PRKG1	Chr26	6905321	8343635	1438314	1285	0.000893407
GSAP	Chr4	44061012	44149472	88460	79	0.000893059
EPHX4	Chr3	51494275	51531276	37001	33	0.000891868
VIT	Chr11	19179547	19302492	122945	109	0.000886575
MOB2	Chr29	50963920	51016955	53035	47	0.000886207
RAB6B	Chr1	136573248	136630811	57563	51	0.000885986
BFSP2	Chr1	137030465	137107231	76766	68	0.000885809
KCNU1	Chr27	31849126	31993694	144568	128	0.000885396
GAS2	Chr29	22275084	22423775	148691	129	0.000867571
FGGY	Chr3	86788073	87273175	485102	418	0.000861674
ME2	Chr24	50870261	50928290	58029	50	0.000861638
SIRPA	Chr13	53668954	53710782	41828	36	0.000860667
FHIT	Chr22	40603978	42134601	1530623	1317	0.000860434
CD36	Chr4	40580267	40634931	54664	47	0.000859798
CPPED1	Chr25	11494716	11602903	108187	93	0.000859623
HDHD1	ChrX	146775606	146843115	67509	58	0.000859145
MTUS1	Chr27	18632851	18698059	65208	56	0.00085879
COLEC12	Chr24	35630927	35816269	185342	157	0.000847083
IMMT	Chr11	48544000	48586544	42544	36	0.000846183
GNG4	Chr28	8340140	8408741	68601	58	0.000845469
SORBS1	Chr26	16687128	16919269	232141	196	0.000844314
CSRNP3	Chr2	30716350	30808741	92391	78	0.000844238
WC-7	Chr5	102467490	102524414	56924	48	0.00084323
HCRTR2	Chr23	5043871	5175679	131808	111	0.000842134
ASNS	Chr4	15035752	15183208	147456	124	0.000840929
SLIT3	Chr20	324338	1051861	727523	609	0.000837087
NUF2	Chr3	6033718	6072026	38308	32	0.000835335
PHF20L1	Chr14	9551696	9598565	46869	39	0.000832107
SNX24	Chr7	32140922	32313012	172090	143	0.000830961
EGFLAM	Chr20	35999048	36178472	179424	149	0.000830435
MCU	Chr28	28868034	29061650	193616	160	0.000826378
GLMN	Chr3	51282135	51325805	43670	36	0.000824365
BOD1L	Chr6	113647964	113701414	53450	44	0.000823199
RAP2A	Chr12	78507682	78546608	38926	32	0.000822073
RGS9	Chr19	62614365	62656129	41764	34	0.000814098
ACYP2	Chr11	36683362	36862403	179041	145	0.00080987
FN1	Chr2	103881401	103950562	69161	56	0.000809705
VMP1	Chr19	10903732	11032403	128671	104	0.000808263
SYNE3	Chr21	61852803	61963799	110996	89	0.000801831
SMG6	Chr19	23660755	23858483	197728	158	0.000799078
PRPF18	Chr13	28565186	28620269	55083	44	0.000798795
SFXN1	Chr10	5552569	5612663	60094	48	0.000798749
PARP1	Chr16	30119201	30160574	41373	33	0.000797622
SLC10A7	Chr17	11923470	12064071	140601	112	0.00079658
AGXT2	Chr20	39156952	39199658	42706	34	0.000796141
OPCML	Chr29	34554006	35085490	531484	423	0.000795885
HS3ST5	Chr9	36551273	36844170	292897	232	0.000792087
GUCY2F	ChrX	62214455	62364957	150502	119	0.000790687
GBE1	Chr1	28659455	28972472	313017	247	0.000789095
MAPK10	Chr6	102687304	103063477	376173	296	0.000786872
RALGPS2	Chr16	61559976	61719616	159640	125	0.000783012
HMCN1	Chr16	68192900	68733392	540492	423	0.00078262
TCF12	Chr10	53089212	53481049	391837	305	0.000778385
WASF1	Chr9	40520451	40591232	70781	55	0.000777045
MED23	Chr9	70517803	70573296	55493	43	0.000774873
POLR2B	Chr6	74027218	74071144	43926	34	0.000774029
PSTPIP2	Chr24	46196111	46290465	94354	73	0.000773682
MTBP	Chr14	84167935	84244274	76339	59	0.000772868
GCLC	Chr23	6922379	6965163	42784	33	0.000771316
CUL1	Chr4	112756674	112810194	53520	41	0.000766069
PSTPIP2	Chr24	46196111	46290465	94354	72	0.000763084
HEXA	Chr10	19092345	19126422	34077	26	0.000762978
MLPH	Chr3	117584072	117637812	53740	41	0.000762933
CCDC172	Chr26	37073737	37131447	57710	44	0.000762433
C21H14orf132	Chr21	62512214	62559447	47233	36	0.000762179
NCR3	Chr23	27490998	27523803	32805	25	0.000762079
TMEFF2	Chr2	80997732	81275827	278095	211	0.000758734
SCHIP1	Chr1	108383676	108454122	70446	53	0.000752349
TFDP2	Chr1	127977929	128027258	49329	37	0.000750066
KCNB2	Chr14	37990750	38454479	463729	347	0.000748282
GPR107	Chr11	100432296	100484524	52228	39	0.000746726
SNAP47	Chr7	3315949	3381685	65736	49	0.000745406
CD36	Chr4	40580267	40643381	63114	47	0.000744684
DSC3	Chr24	26396991	26448151	51160	38	0.000742768
COLEC12	Chr24	35630927	35816269	185342	137	0.000739174
MED23	Chr9	70517803	70573296	55493	41	0.000738832
ASAP1	Chr14	11327980	11696284	368304	272	0.00073852
GRIA1	Chr7	66763267	67109662	346395	255	0.000736154
IL34	Chr18	1548805	1608706	59901	44	0.000734545
MREG	Chr2	104492355	104560643	68288	50	0.000732193
NCAPH	Chr11	2401654	2435806	34152	25	0.000732022
LCP2	Chr20	2032971	2082267	49296	36	0.000730282
PELI1	Chr11	62471606	62528075	56469	41	0.000726062
QSOX1	Chr16	62804446	62845819	41373	30	0.000725111
OPCML	Chr29	34991563	35575245	583682	423	0.00072471
OSBPL3	Chr4	71296752	71493056	196304	142	0.000723368
FAM135B	Chr14	5423555	5657245	233690	169	0.00072318
ALDH1A1	Chr8	49354206	49408166	53960	39	0.000722758
C15H11orf74	Chr15	67844539	67911152	66613	48	0.00072058
AOX4	Chr2	89699123	89771427	72304	52	0.000719186
NCAPD3	Chr15	84777783	84838995	61212	44	0.000718813
GPR110	Chr23	20206357	20250984	44627	32	0.000717055
CDH20	Chr24	60532424	60586878	54454	39	0.000716201
PDLIM5	Chr6	31419268	31567339	148071	106	0.000715873
PDZK1	Chr3	21755126	21801225	46099	33	0.000715851
PHYHIPL	Chr28	14904832	14999869	95037	68	0.000715511
GALNTL6	Chr8	3816703	5330615	1513912	1082	0.000714705
SLC22A23	Chr23	50234184	50323826	89642	64	0.000713951
GALNT2	Chr28	1126800	1313125	186325	133	0.000713807
SMYD2	Chr16	70760232	70813706	53474	38	0.000710626
CLCN1	Chr4	107518110	107554736	36626	26	0.000709878
MRPL3	Chr1	139880638	139937341	56703	40	0.00070543
PPP1R1C	Chr2	14502889	14623643	120754	85	0.00070391
NUP210	Chr22	59152805	59245367	92562	65	0.000702232
ABCA12	Chr2	103520023	103720887	200864	141	0.000701968
UNC13C	Chr10	55715816	56410341	694525	487	0.000701199
UGT8	Chr6	12092952	12201473	108521	76	0.000700325
TTLL7	Chr3	60357481	60449087	91606	64	0.000698644
FLT1	Chr12	31648192	31853085	204893	143	0.000697925
ARMC3	Chr13	24241793	24306463	64670	45	0.00069584
OSMR	Chr20	35519137	35588177	69040	48	0.000695249
GTF2IRD1	Chr25	33414262	33493476	79214	55	0.000694322
PAX3	Chr2	111127791	111229639	101848	70	0.000687299
FANCC	Chr8	83022521	83392672	370151	254	0.000686206
SPTBN1	Chr11	37030008	37241384	211376	145	0.000685981
PARP8	Chr20	28315520	28506629	191109	131	0.000685473
NUAK1	Chr5	69816582	69892512	75930	52	0.000684841
SYNJ2BP	Chr10	82347060	82386494	39434	27	0.000684688
FAM3C	Chr4	86620367	86674480	54113	37	0.000683754
AASS	Chr4	87301468	87373279	71811	49	0.000682347
NDST4	Chr6	11683809	11962933	279124	190	0.000680701
UNC13B	Chr8	59797488	60010848	213360	145	0.000679603
PIK3C2G	Chr5	91835142	92276939	441797	300	0.000679045
BFSP1	Chr13	38182319	38220669	38350	26	0.000677966
RBM46	Chr17	2523017	2567620	44603	30	0.0006726
KIF2A	Chr20	17009550	17067537	57987	39	0.000672565
FGF2	Chr17	35199614	35259135	59521	40	0.000672032
TSSC1	Chr8	113001324	113068623	67299	45	0.000668658
PIK3C2G	Chr5	91835142	92276939	441797	295	0.000667727
GRM7	Chr22	18701583	19647970	946387	630	0.00066569
RMND5A	Chr11	48010425	48066194	55769	37	0.000663451
SLC15A1	Chr12	79605250	79652128	46878	31	0.000661291
HS6ST3	Chr12	77227237	77947529	720292	476	0.000660843
MPDZ	Chr8	31133715	31280540	146825	97	0.00066065
PLCB1	Chr13	789367	1695916	906549	593	0.000654129
UBE3D	Chr9	23061427	23228366	166939	109	0.000652933
GTSE1	Chr5	117677521	117738847	61326	40	0.000652252
KCND2	Chr4	85436726	86002870	566144	369	0.000651778
MEGF10	Chr7	27820354	27998816	178462	116	0.000649998
CEP162	Chr9	66115461	66211054	95593	62	0.000648583
DOCK9	Chr12	79691578	79870108	178530	115	0.000644149
ELOVL7	Chr20	18455782	18535002	79220	51	0.000643777
EPHA10	Chr3	108737031	108777675	40644	26	0.000639701
SCYL2	Chr5	64560030	64616522	56492	36	0.000637258
HOOK3	Chr27	37278343	37358417	80074	51	0.000636911
ATAD1	Chr26	9410908	9451790	40882	26	0.000635977
GALNTL6	Chr8	3816703	5330615	1513912	962	0.00063544
SMYD3	Chr16	31589363	32333420	744057	472	0.00063436
TTC1	Chr7	73708739	73757646	48907	31	0.000633856
PTER	Chr13	31202454	31278293	75839	48	0.00063292
SUPT3H	Chr23	18223166	18623656	400490	253	0.000631726
CEP41	Chr4	94959110	95006794	47684	30	0.000629142
BBOX1	Chr15	58532711	58609231	76520	48	0.000627287
IL7	Chr14	44097777	44187672	89895	56	0.000622949
ZDHHC17	Chr5	6160013	6258264	98251	61	0.000620859
KIRREL3	Chr29	30128059	30886851	758792	471	0.000620723
DPYD	Chr3	45563731	46487165	923434	573	0.00062051
GRIA4	Chr15	2114095	2719504	605409	375	0.000619416
PTK7	Chr23	16677834	16740803	62969	39	0.000619352
ANO3	Chr15	57843134	58130615	287481	178	0.000619171
WDFY1	Chr2	112793507	112845293	51786	32	0.000617928
SPIN1	Chr8	91185516	91234089	48573	30	0.000617627
SCFD2	Chr6	70187885	70585267	397382	245	0.000616535
GALNTL6	Chr8	3816703	5330615	1513912	930	0.000614303
CUBN	Chr13	31559726	31826838	267112	164	0.000613975
LHFPL3	Chr4	45806017	46389155	583138	358	0.00061392
ARHGAP24	Chr6	102500169	102666722	166553	102	0.000612418
FAM19A1	Chr22	33081564	33591957	510393	312	0.000611294
RARRES1	Chr1	109661961	109704523	42562	26	0.000610874
FSTL5	Chr17	37149471	38027600	878129	536	0.000610389
PLCB4	Chr13	2211088	2411116	200028	122	0.000609915
ELMOD1	Chr15	17375526	17461025	85499	52	0.000608194
MAPRE2	Chr24	22190113	22306884	116771	71	0.000608028
DDHD1	Chr10	65905384	65971532	66148	40	0.000604705
NLGN1	Chr1	93626046	94742072	1116026	673	0.000603033
SEZ6	Chr19	20879074	20927187	48113	29	0.000602748
RNF19A	Chr14	66242246	66298706	56460	34	0.000602196
PLCE1	Chr26	15371779	15702253	330474	199	0.000602165
RNF180	Chr20	15075200	15320360	245160	146	0.000595529
PSMB7	Chr11	95401673	95458914	57241	34	0.00059398
STAMBPL1	Chr26	10597572	10650148	52576	31	0.000589623
ADAM3A	Chr27	34367776	34483222	115446	68	0.00058902
CUL2	Chr13	18592917	18664294	71377	42	0.000588425
WC1.3	Chr5	103106901	103490978	384077	226	0.000588424
ARNT	Chr3	19927038	19991725	64687	38	0.000587444
ATP2B4	Chr16	1249731	1313257	63526	37	0.000582439
NRXN3	Chr10	91597566	92224180	626614	363	0.000579304
CUL1	Chr4	112756674	112810194	53520	31	0.000579223
PRKCI	Chr1	97882799	97952035	69236	40	0.000577734
NEGR1	Chr3	73111653	74147063	1035410	596	0.000575617
CTNNA3	Chr28	22418863	24299242	1880379	1082	0.000575416
ZDHHC20	Chr12	35781298	35837118	55820	32	0.000573271
RALYL	Chr14	80029572	80865916	836344	479	0.000572731
NRXN1	Chr11	32128916	32596820	467904	265	0.000566355
OXSR1	Chr22	11674126	11758890	84764	48	0.000566278
KCNK1	Chr28	6492388	6559858	67470	38	0.000563213
GRIK2	Chr9	48474664	49218775	744111	419	0.000563088
AP3B1	Chr10	9040250	9300567	260317	146	0.000560855
ADAM9	Chr27	33804291	33897036	92745	52	0.000560677
RDX	Chr15	20589669	20657445	67776	38	0.00056067
WDR64	Chr16	35800135	35935901	135766	76	0.000559787
GLRB	Chr17	42996912	43086245	89333	50	0.000559704
SEC22A	Chr1	68170558	68233521	62963	35	0.000555882
DNMBP	Chr26	20694706	20777487	82781	46	0.000555683
ANKS1B	Chr5	63229075	63658499	429424	238	0.000554231
CPQ	Chr14	69287299	69893052	605753	335	0.000553031
NDFIP2	Chr12	54923942	54994489	70547	39	0.000552823
HSPBAP1	Chr1	67664798	67720894	56096	31	0.000552624
SAMSN1	Chr1	22123654	22181827	58173	32	0.000550083
ACE2	ChrX	135148961	135198063	49102	27	0.000549876
SFXN1	Chr10	5552569	5612663	60094	33	0.00054914
KIRREL3	Chr29	30128059	30886851	758792	416	0.00054824
PDZRN4	Chr5	39498214	39857738	359524	197	0.000547947
PARM1	Chr6	91597121	91723392	126271	69	0.000546444
FHL5	Chr9	53977186	54030371	53185	29	0.000545267
GUCY1A2	Chr15	16604380	17100655	496275	270	0.000544053
RADIL	Chr25	39683975	39733712	49737	27	0.000542855
CDH9	Chr20	46652610	46794454	141844	77	0.00054285
KIRREL3	Chr29	30128059	30886851	758792	409	0.000539015
SHROOM3	Chr6	93066720	93399009	332289	179	0.000538688
CASR	Chr1	67255526	67344655	89129	48	0.000538545
SLC8A3	Chr10	82128378	82273227	144849	78	0.000538492
HIPK1	Chr3	29512757	29563150	50393	27	0.000535789
TBC1D1	Chr6	58848557	59065295	216738	116	0.000535208
PNKD	Chr2	107020665	107093550	72885	39	0.00053509
AQR	Chr10	30432599	30514864	82265	44	0.000534857
LRIG2	Chr3	30361356	30423186	61830	33	0.000533721
RFTN2	Chr2	86505715	86581573	75858	40	0.000527301
MYO10	Chr20	56295178	56572213	277035	146	0.000527009
CDKAL1	Chr23	36601289	37218380	617091	324	0.000525044
HMBOX1	Chr8	9500605	9691300	190695	100	0.000524398
PTPRZ1	Chr4	87077522	87295626	218104	114	0.000522686
SLC9A9	Chr1	126040088	126704343	664255	346	0.000520884
MACROD2	Chr13	7697329	10043273	2345944	1221	0.000520473
TNNI3K	Chr3	70487278	70835445	348167	181	0.000519865
HS6ST3	Chr12	77227237	77947529	720292	374	0.000519234
SSFA2	Chr2	14683867	14751322	67455	35	0.000518864
MDFIC	Chr4	53756421	53854749	98328	51	0.000518672
NDUFA10	Chr3	119633965	119794438	160473	83	0.000517221
C8A	Chr3	89797012	89869019	72007	37	0.000513839
FANCM	Chr21	55336793	55395266	58473	30	0.000513057
GRK5	Chr26	39702549	39930995	228446	117	0.000512156
GNG4	Chr28	8340140	8408741	68601	35	0.000510197
PDXDC1	Chr25	13824243	13879128	54885	28	0.000510158
PRDM10	Chr29	36684171	36749050	64879	33	0.000508639
PRKACB	Chr3	60082314	60221943	139629	71	0.00050849
TNNI3K	Chr3	70487278	70835445	348167	176	0.000505505
ST6GAL2	Chr11	45414101	45469591	55490	28	0.000504595
RASA3	Chr12	90916420	90995694	79274	40	0.000504579
KIF21A	Chr5	41963880	42148320	184440	93	0.000504229
ITPR3	Chr23	7687260	7756803	69543	35	0.000503286
RBFOX1	Chr25	5417263	6686802	1269539	638	0.000502545
WHSC1L1	Chr27	33077030	33226326	149296	75	0.000502358
VAT1L	Chr18	5045211	5211278	166067	83	0.000499798
RPA1	Chr19	23476633	23527009	50376	25	0.000496268
TNFRSF10D	Chr8	70908188	71192762	284574	141	0.000495477
ARHGEF10L	Chr2	135557021	135672134	115113	57	0.000495166
ARHGAP26	Chr7	55695012	56167822	472810	234	0.000494913
MBNL2	Chr12	78283459	78445752	162293	80	0.000492936
ACACA	Chr19	13752491	13996058	243567	120	0.000492678
GRIA4	Chr15	2114095	2719504	605409	297	0.000490577
HDHD1	ChrX	146775606	146843115	67509	33	0.000488824
CALN1	Chr25	28894400	29349033	454633	222	0.000488306
MACROD2	Chr13	7697329	10043273	2345944	1145	0.000488076
AACS	Chr17	52974077	53027510	53433	26	0.000486591
MMS22L	Chr9	53228693	53352399	123706	60	0.000485021
LAPTM4B	Chr14	68668783	68730663	61880	30	0.000484809
KCNK9	Chr14	4644331	4741652	97321	47	0.000482938
ZBTB16	Chr15	24917132	25116350	199218	96	0.000481884
RYR1	Chr18	48502351	48631058	128707	62	0.000481714
ITGB5	Chr1	69801836	69899675	97839	47	0.000480381
ITGB5	Chr1	69801836	69899675	97839	47	0.000480381
CFH	Chr16	5486704	6172566	685862	329	0.000479688
PACRG	Chr9	99649025	99714507	65482	31	0.000473413
MIR2285F-1	ChrX	6552538	6933324	380786	180	0.000472706
DOCK7	Chr3	83467727	83658146	190419	90	0.000472642
GSG1L	Chr25	25599907	25852495	252588	119	0.000471123
HPCAL1	Chr11	87191208	87307998	116790	55	0.000470931
GSN	Chr8	112578065	112639756	61691	29	0.000470085
AFF2	ChrX	31424261	31968595	544334	255	0.000468462
PPIP5K2	Chr7	104559249	104642552	83303	39	0.00046817
TSPAN7	ChrX	110055861	110188380	132519	62	0.000467857
HS3ST5	Chr9	36551273	36844170	292897	137	0.000467741
TBXAS1	Chr4	104133818	104307006	173188	81	0.0004677
DAAM1	Chr10	71730212	71916530	186318	87	0.000466944
PLCB1	Chr13	789367	1695916	906549	423	0.000466605
MUSK	Chr8	101881882	101976250	94368	44	0.00046626
RHBDL2	Chr3	107634941	107692937	57996	27	0.000465549
FZD3	Chr8	10002971	10091175	88204	41	0.000464832
KIRREL3	Chr29	30128059	30886851	758792	352	0.000463895
CAMK2B	Chr4	77706697	77797332	90635	42	0.000463397
LRRFIP2	Chr22	10379810	10490264	110454	51	0.000461731
PRKG1	Chr26	6905321	8343635	1438314	663	0.000460956
ZNF277	Chr4	55994118	56128665	134547	62	0.000460806
STX7	Chr9	71381756	71455585	73829	34	0.000460524
ASIC2	Chr19	16353061	17563070	1210009	557	0.000460327
ITPR3	Chr23	7687260	7756803	69543	32	0.000460147
GALNT9	Chr17	45843854	45930839	86985	40	0.000459849
MTPN	Chr4	100550305	100626568	76263	35	0.000458938
ASH1L	Chr3	15176830	15353404	176574	81	0.000458731
ABCD3	Chr3	49136316	49225714	89398	41	0.000458623
PRKACB	Chr3	60082314	60221943	139629	64	0.000458358
CHD9	Chr18	21634591	21859834	225243	103	0.000457284
GABRA5	Chr21	4407153	4499280	92127	42	0.000455892
CHRM3	Chr28	12498191	12812574	314383	143	0.000454859
SEC23A	Chr21	49489514	49555507	65993	30	0.000454594
SPAG9	Chr19	36343606	36422983	79377	36	0.000453532
FER	Chr7	110465381	110864228	398847	180	0.000451301
TBCE	Chr28	8143950	8232967	89017	40	0.000449352
NUP205	Chr4	100178311	100258652	80341	36	0.00044809
FOXN3	Chr10	101891647	102300271	408624	183	0.000447844
CAPN13	Chr11	69045267	69121248	75981	34	0.00044748
ARMC9	Chr2	119777717	119932193	154476	69	0.000446671
WWOX	Chr18	5283871	6197660	913789	408	0.000446493
SOX6	Chr15	36600419	37082361	481942	214	0.000444037
LRP12	Chr14	62215197	62305653	90456	40	0.000442204
PRMT8	Chr5	106811677	106879735	68058	30	0.0004408
SCHIP1	Chr1	108383676	108454122	70446	31	0.000440053
SLC1A1	Chr8	40180178	40253112	72934	32	0.000438753
ITGB8	Chr4	29124580	29216280	91700	40	0.000436205
ANKRD55	Chr20	23007390	23117580	110190	48	0.000435611
MAP3K7	Chr9	60555708	60620134	64426	28	0.000434607
VAT1L	Chr18	5045211	5211278	166067	72	0.00043356
NLGN1	Chr1	93626046	94742072	1116026	482	0.00043189
TAF4B	Chr24	30850954	30957469	106515	46	0.000431864
SYNRG	Chr19	14125751	14209164	83413	36	0.000431587
MSI2	Chr19	8321185	8725348	404163	174	0.000430519
KCNIP3	Chr11	2015181	2096936	81755	35	0.000428108
ASPH	Chr14	28700904	28888279	187375	80	0.000426951
SORCS1	Chr26	27810197	28389391	579194	247	0.000426455
CD99L2	ChrX	33636322	33739781	103459	44	0.000425289
ENPP3	Chr9	70588606	70673281	84675	36	0.000425155
CDK19	Chr9	39956473	40123498	167025	71	0.000425086
THSD7A	Chr4	19451227	19727595	276368	117	0.000423349
ABI1	Chr13	18094998	18177777	82779	35	0.000422813
EFR3A	Chr14	10169833	10250749	80916	34	0.000420189
SNX29	Chr25	10743975	11273963	529988	222	0.000418877
SLC2A13	Chr5	41062651	41559936	497285	208	0.000418271
C8A	Chr3	89797012	89869019	72007	30	0.000416626
IBTK	Chr9	22261983	22343685	81702	34	0.000416146
ADAM23	Chr2	95145118	95340406	195288	81	0.000414772
GPC5	Chr12	66292145	67325671	1033526	426	0.000412181
ELP4	Chr15	63093254	63350468	257214	106	0.000412108
TMCC3	Chr5	24466578	24537335	70757	29	0.000409853
GABRG1	Chr6	66238178	66316331	78153	32	0.000409453
DPYS	Chr14	62328131	62418497	90366	37	0.000409446
TEX2	Chr19	49006473	49133532	127059	52	0.000409259
MACROD2	Chr13	7697329	10043273	2345944	959	0.000408791
KMT2E	Chr4	46474530	46565717	91187	37	0.00040576
DPP10	Chr2	67307817	68111289	803472	326	0.000405739
BRINP3	Chr16	15776863	16267370	490507	199	0.000405703
PPFIA1	Chr29	48078849	48153361	74512	30	0.00040262
ADGRD1	Chr17	47028028	47202358	174330	70	0.000401537
MET	Chr4	51912650	52042198	129548	52	0.000401396
FAM19A1	Chr22	33081564	33591957	510393	204	0.000399692
GRM1	Chr9	84394785	84818562	423777	169	0.000398795
PARK2	Chr9	98421509	99648791	1227282	489	0.000398441
SLIT2	Chr6	41236269	41642320	406051	161	0.000396502
LYRM4	Chr23	49282978	49374342	91364	36	0.000394028
PRKACB	Chr3	60082314	60221943	139629	55	0.000393901
PAX3	Chr2	111127791	111229639	101848	40	0.000392742
MMRN1	Chr6	36087554	36199876	112322	44	0.000391731
FOXN3	Chr10	101891647	102300271	408624	160	0.000391558
SMOC2	Chr9	104225986	104384490	158504	62	0.000391157
DNAJC13	Chr1	138139495	138305752	166257	65	0.000390961
FLNB	Chr22	43674719	43815706	140987	55	0.000390107
PBX1	Chr3	4227488	4527427	299939	117	0.000390079
GPM6A	Chr27	6265765	6417208	151443	59	0.000389586
ASAP1	Chr14	11327980	11696284	368304	143	0.000388266
ACN9	Chr4	14364654	14452242	87588	34	0.000388181
IGF2R	Chr9	97638101	97741388	103287	40	0.00038727
CTNNBL1	Chr13	67257418	67431112	173694	67	0.000385736
MPP7	Chr13	36610251	36833263	223012	86	0.000385629
ASIC2	Chr19	16353061	17563070	1210009	464	0.000383468
LAMA4	Chr9	38644190	38811230	167040	64	0.000383142
SPINK5	Chr7	61321640	61405245	83605	32	0.000382752
CASQ2	Chr3	27658861	27729417	70556	27	0.000382675
FUT10	Chr27	28322729	28390717	67988	26	0.00038242
GON4L	Chr3	15009726	15093527	83801	32	0.000381857
LANCL2	Chr22	701103	784959	83856	32	0.000381607
SNCA	Chr6	36285493	36432430	146937	56	0.000381116
EPHB1	Chr1	135191077	135658387	467310	178	0.000380903
ACBD6	Chr16	62930459	63128053	197594	75	0.000379566
USP15	Chr5	51378316	51510100	131784	50	0.000379409
BACE2	Chr1	142875108	142980629	105521	40	0.000379071
OLA1	Chr2	22564517	22728763	164246	62	0.000377483
ITPR2	Chr5	83398940	83986145	587205	220	0.000374656
APBB2	Chr6	61362543	61744231	381688	143	0.000374652
ACER3	Chr15	57028595	57186215	157620	59	0.000374318
AUH	Chr8	87946779	88123853	177074	66	0.000372726
PPP1R16B	Chr13	68258626	68366080	107454	40	0.000372252
ANO3	Chr15	57843134	58130615	287481	107	0.000372199
TECRL	Chr6	81511553	81653990	142437	53	0.000372094
NFATC3	Chr18	35640708	35732176	91468	34	0.000371715
NOX4	Chr29	6147892	6328468	180576	67	0.000371035
GUCY1A2	Chr15	16604380	17100655	496275	184	0.000370762
COLGALT2	Chr16	66452390	66571427	119037	44	0.000369633
ERC2	Chr22	45094509	45555747	461238	170	0.000368573
CMYA5	Chr10	10613899	10711992	98093	36	0.000366999
RUNX1	Chr1	148678709	148949053	270344	99	0.0003662
CDH18	Chr20	53409875	54014026	604151	221	0.000365803
SMYD3	Chr16	31589363	32333420	744057	272	0.000365563
TRAPPC12	Chr8	112962792	113085992	123200	45	0.00036526
36951	Chr6	1947846	2082068	134222	49	0.000365067
HIP1	Chr25	34393879	34528240	134361	49	0.000364689
DCAF6	Chr3	587033	768209	181176	66	0.000364287
PEX1	Chr4	9637831	9723444	85613	31	0.000362095
ITGA2	Chr20	25984554	26089593	105039	38	0.00036177
ADCY1	Chr4	76869664	76969459	99795	36	0.00036074
TMEM117	Chr5	36197270	36807308	610038	220	0.000360633
WWOX	Chr18	5283871	6197660	913789	329	0.000360039
SNAP25	Chr13	3369181	3452556	83375	30	0.00035982
ITGA4	Chr2	15115672	15207508	91836	33	0.000359336
LSAMP	Chr1	61026445	61780987	754542	271	0.000359158
PDZRN4	Chr5	39498214	39857738	359524	129	0.000358808
CYFIP1	Chr2	996055	1104771	108716	39	0.000358733
ABL2	Chr16	61897893	61993174	95281	34	0.000356839
TRPC4	Chr12	23989789	24194475	204686	73	0.000356644
ENTHD1	Chr5	111671082	111766560	95478	34	0.000356103
MRE11A	Chr15	1640851	1716775	75924	27	0.000355619
RUNX1	Chr1	148678709	148949053	270344	96	0.000355103
TLE4	Chr8	55837380	55992437	155057	55	0.000354708
FAM78B	Chr3	2775287	2868354	93067	33	0.000354583
APLF	Chr11	66840543	66933745	93202	33	0.00035407
ELMOD1	Chr15	17375526	17461025	85499	30	0.000350881
STK10	Chr20	3758357	3881011	122654	43	0.00035058
SLC22A15	Chr3	27378642	27481821	103179	36	0.000348908
EXT1	Chr14	48318417	48634023	315606	110	0.000348536
GALNT14	Chr11	68745031	68963585	218554	76	0.00034774
DCAF6	Chr3	587033	768209	181176	63	0.000347728
SNX7	Chr3	44657521	44775833	118312	41	0.000346541
MBNL2	Chr12	78283459	78445752	162293	56	0.000345055
MYO10	Chr20	56295178	56572213	277035	95	0.000342917
TBC1D14	Chr6	118212843	118312153	99310	34	0.000342362
CAB39	Chr2	119340635	119443045	102410	35	0.000341763
SLC20A2	Chr27	36938384	37017424	79040	27	0.000341599
TRAPPC12	Chr8	112962792	113085992	123200	42	0.000340909
RELN	Chr4	44891362	45475480	584118	199	0.000340685
ATXN10	Chr5	116756234	116897165	140931	48	0.000340592
C6H4orf22	Chr6	96794833	97503367	708534	241	0.000340139
TRIM44	Chr15	66987986	67099794	111808	38	0.000339868
SCN5A	Chr22	12015689	12118718	103029	35	0.00033971
QKI	Chr9	100370794	100479814	109020	37	0.000339387
NDUFAF2	Chr20	18200870	18371920	171050	58	0.000339082
KCNAB1	Chr1	112013081	112314022	300941	102	0.000338937
KIRREL3	Chr29	30128059	30886851	758792	256	0.000337378
SCAMP1	Chr10	9369309	9520700	151391	51	0.000336876
KIF21A	Chr5	41963880	42148320	184440	62	0.000336153
ZDHHC17	Chr5	6160013	6258264	98251	33	0.000335874
PRKG1	Chr26	6905321	8343635	1438314	482	0.000335115
ADD3	Chr26	30840112	30971460	131348	44	0.000334988
SV2B	Chr21	16214667	16460490	245823	82	0.000333573
PRRX1	Chr16	39016046	39091101	75055	25	0.000333089
GHR	Chr20	31890735	32199996	309261	103	0.000333052
GALNTL6	Chr8	3816703	5330615	1513912	504	0.000332912
MTHFD1L	Chr9	89136865	89266065	129200	43	0.000332817
RAP1GDS1	Chr6	27535298	27638248	102950	34	0.000330257
PRKG1	Chr26	6905321	8343635	1438314	475	0.000330248
SCEL	Chr12	53032462	53156625	124163	41	0.000330211
SYK	Chr8	88423420	88529462	106042	35	0.000330058
NDUFS4	Chr20	25407684	25523382	115698	38	0.000328441
EXOC6B	Chr11	11618054	12066810	448756	147	0.000327572
DNAJC15	Chr12	13183733	13266310	82577	27	0.000326968
LSAMP	Chr1	61026445	61780987	754542	246	0.000326026
PPA2	Chr6	20984353	21082556	98203	32	0.000325856
GMDS	Chr23	51115435	51453575	338140	110	0.000325309
MACROD2	Chr13	7697329	10043273	2345944	763	0.000325242
AJAP1	Chr16	49832131	49912373	80242	26	0.00032402
SLC22A23	Chr23	50234184	50323826	89642	29	0.000323509
MGLL	Chr22	60408904	60495755	86851	28	0.000322391
APLF	Chr11	66840543	66933745	93202	30	0.000321882
FSTL5	Chr17	37149471	38027600	878129	282	0.000321137
HIP1	Chr25	34393879	34528240	134361	43	0.000320033
EEFSEC	Chr22	60063338	60172924	109586	35	0.000319384
DDX10	Chr15	18644691	18952412	307721	98	0.00031847
ZDHHC14	Chr9	95439712	95744856	305144	97	0.000317883
MPZL1	Chr3	930874	1012734	81860	26	0.000317615
TYR	Chr29	6351876	6462240	110364	35	0.000317132
GPM6A	Chr27	6265765	6417208	151443	48	0.000316951
RAB3GAP1	Chr2	62457395	62568130	110735	35	0.00031607
RAB3C	Chr20	20449773	20740981	291208	92	0.000315925
CNOT2	Chr5	43361159	43494162	133003	42	0.000315782
XRN1	Chr1	127591936	127699862	107926	34	0.000315031
RAB3C	Chr20	20448535	20741101	292566	92	0.000314459
CSRNP3	Chr2	30716350	30808741	92391	29	0.000313883
LRRC7	Chr3	75355802	75744768	388966	122	0.000313652
PIK3CB	Chr1	131351895	131530834	178939	56	0.000312956
TRIM33	Chr3	28948284	29088936	140652	44	0.000312829
STXBP6	Chr21	35415157	35655955	240798	75	0.000311464
ARMC9	Chr2	119777717	119932193	154476	48	0.000310728
ADCY1	Chr4	76869664	76969459	99795	31	0.000310637
NARS2	Chr29	17544421	17628586	84165	26	0.000308917
STXBP5L	Chr1	66213611	66538294	324683	100	0.000307993
RNF13	Chr1	119160736	119290651	129915	40	0.000307894
TSPAN5	Chr6	27333478	27512869	179391	55	0.000306593
CFH	Chr16	5486704	6172566	685862	210	0.000306184
EXOC1	Chr6	72512586	72989476	476890	146	0.00030615
MTHFD2L	Chr6	90842884	90986715	143831	44	0.000305915
PARG	Chr28	44283035	44397693	114658	35	0.000305256
SIPA1L2	Chr28	5250005	5367946	117941	36	0.000305237
PHYHIPL	Chr28	14904832	14999869	95037	29	0.000305144
LRFN5	Chr21	51772759	52095084	322325	98	0.000304041
ZMYND8	Chr13	76501072	76616233	115161	35	0.000303922
NRXN1	Chr11	32128916	32596820	467904	142	0.000303481
CERS6	Chr2	27407916	27758923	351007	106	0.000301988
CLDN10	Chr12	76758753	76864806	106053	32	0.000301736
GIPC2	Chr3	66795565	66895377	99812	30	0.000300565
OSBPL3	Chr4	71296752	71493056	196304	59	0.000300554
SLIT3	Chr20	324338	1051861	727523	218	0.000299647
CDH18	Chr20	53409875	54014026	604151	181	0.000299594
PCDH7	Chr6	51536862	52009280	472418	141	0.000298464
PARP8	Chr20	28315520	28506629	191109	57	0.000298259
PTPN4	Chr2	71992464	72146835	154371	46	0.000297983
GNG7	Chr7	22200649	22338566	137917	41	0.00029728
PLCB1	Chr13	789367	1695916	906549	269	0.00029673
DOCK11	ChrX	2555690	2764721	209031	62	0.000296607
CMYA5	Chr10	10613899	10711992	98093	29	0.000295638
KIF5C	Chr2	47315196	47472004	156808	46	0.000293352
HHIP	Chr17	13627441	13736747	109306	32	0.000292756
AMBRA1	Chr15	77264058	77435816	171758	50	0.000291107
DDR2	Chr3	6672015	6847222	175207	51	0.000291084
CFDP1	Chr18	2662462	2766520	104058	30	0.000288301
CACNG3	Chr25	22178044	22278775	100731	29	0.000287895
SCFD1	Chr21	41692841	41804340	111499	32	0.000286998
SCFD2	Chr6	70187885	70585267	397382	114	0.000286878
GTDC1	Chr2	52552245	52897803	345558	99	0.000286493
NRXN1	Chr11	32129670	33353206	1223536	350	0.000286056
ARFGEF1	Chr14	33343881	33480410	136529	39	0.000285654
ARFGEF1	Chr14	33343881	33480410	136529	39	0.000285654
BRINP1	Chr8	110409331	110605777	196446	56	0.000285066
IQCK	Chr25	17424346	17585734	161388	46	0.000285027
LOXL2	Chr8	71278581	71390893	112312	32	0.000284921
SFXN5	Chr11	11360394	11490612	130218	37	0.000284139
WDR33	Chr2	4608386	4717754	109368	31	0.000283447
DNAJC13	Chr1	138139495	138305752	166257	47	0.000282695
DPH6	Chr10	30916468	31109121	192653	54	0.000280297
NTRK2	Chr8	79336287	79504464	168177	47	0.000279467
SNX24	Chr7	32140922	32313012	172090	48	0.000278924
SORCS3	Chr26	25469309	26398291	928982	259	0.0002788
CFH	Chr16	5486704	6172566	685862	191	0.000278482
STK32A	Chr7	60450228	60579589	129361	36	0.000278291
MLLT3	Chr8	23748585	24032951	284366	79	0.000277811
MAN1A2	Chr3	25821098	25969358	148260	41	0.000276541
LOC751562	Chr23	34386962	34491996	105034	29	0.000276101
NTN4	Chr5	60372423	60502966	130543	36	0.000275771
PPA2	Chr6	20984353	21082556	98203	27	0.000274941
ZDHHC17	Chr5	6160013	6258264	98251	27	0.000274806
ETV6	Chr5	98412611	98576592	163981	45	0.000274422
PCCA	Chr12	80793546	81155394	361848	99	0.000273596
SYNDIG1	Chr13	42791821	42894171	102350	28	0.000273571
ROR2	Chr8	87340387	87578642	238255	65	0.000272817
SNX29	Chr25	10743975	11273963	529988	144	0.000271704
TGFB2	Chr16	22495735	22588280	92545	25	0.000270139
CYB5R4	Chr9	66377195	66503206	126011	34	0.000269818
GRM7	Chr22	18701583	19647970	946387	255	0.000269446
CPXM2	Chr26	43828546	43966115	137569	37	0.000268956
SLC7A14	Chr1	97650782	97762869	112087	30	0.000267649
TEX2	Chr19	49006473	49133532	127059	34	0.000267592
GRIA4	Chr15	2114095	2719504	605409	162	0.000267588
HMBOX1	Chr8	9500605	9691300	190695	51	0.000267443
NRK	ChrX	53396016	53525102	129086	34	0.00026339
CA10	Chr19	626244	1473294	847050	223	0.000263267
SLC10A7	Chr17	11923470	12064071	140601	37	0.000263156
MBOAT1	Chr23	37498571	37608778	110207	29	0.000263141
TBC1D1	Chr6	58848557	59065295	216738	57	0.00026299
C25H16orf62	Chr25	17269947	17407207	137260	36	0.000262276
OXNAD1	Chr1	155017756	155158936	141180	37	0.000262077
DDAH1	Chr3	58808969	58965541	156572	41	0.00026186
SLC26A7	Chr14	75397722	75546727	149005	39	0.000261736
GALNT18	Chr15	41624350	41980710	356360	93	0.000260972
WWTR1	Chr1	119437951	119583580	145629	38	0.000260937
C14H8orf34	Chr14	34427578	34830956	403378	105	0.000260302
CNTN5	Chr15	9446547	9985709	539162	140	0.000259662
ANKH	Chr20	58376938	58546813	169875	44	0.000259014
PDZRN4	Chr5	39498214	39857738	359524	93	0.000258675
APP	Chr1	9607381	9921005	313624	81	0.000258271
SMG6	Chr19	23660755	23858483	197728	51	0.00025793
MACROD2	Chr13	7697329	10043273	2345944	605	0.000257892
CHST11	Chr5	68385644	68645774	260130	67	0.000257564
LRFN5	Chr21	51772759	52095084	322325	83	0.000257504
EVA1C	Chr1	2258668	2360034	101366	26	0.000256496
MYO10	Chr20	56295178	56572213	277035	71	0.000256285
JAKMIP1	Chr6	104789269	104918268	128999	33	0.000255816
ATXN10	Chr5	116756234	116897165	140931	36	0.000255444
ATXN10	Chr5	116756234	116897165	140931	36	0.000255444
GNAI1	Chr4	41160157	41266152	105995	27	0.000254729
SLC35F3	Chr28	6762321	7196921	434600	110	0.000253106
GRM7	Chr22	18701583	19647970	946387	239	0.000252539
RABGAP1	Chr11	94092978	94263549	170571	43	0.000252094
SHISA9	Chr25	11704175	12233645	529470	133	0.000251195
HTR4	Chr7	61907646	62066996	159350	40	0.00025102
LSAMP	Chr1	61026445	61780987	754542	189	0.000250483
CDK14	Chr4	7844073	8440697	596624	149	0.000249739
NEGR1	Chr3	73111653	74147063	1035410	258	0.000249177
KCNMB2	Chr1	88784263	89049226	264963	66	0.000249091
MAML2	Chr15	14156345	14558696	402351	100	0.000248539
ATXN10	Chr5	116756234	116897165	140931	35	0.000248348
COL4A1	Chr12	88876124	89009422	133298	33	0.000247566
CPXM2	Chr26	43828546	43966115	137569	34	0.000247149
HOMER1	Chr10	10350690	10484916	134226	33	0.000245854
POU6F2	Chr4	82104335	82495300	390965	96	0.000245546
KIF21A	Chr5	41963880	42148320	184440	45	0.000243982
NDUFA10	Chr3	119633965	119794438	160473	39	0.000243032
MED13L	Chr17	60900482	61145866	245384	59	0.000240439
CTNNA3	Chr28	22418863	24299242	1880379	452	0.000240377
MCPH1	Chr27	4313368	4554749	241381	58	0.000240284
CRB1	Chr16	78094757	78320235	225478	54	0.000239491
CDC42BPA	Chr16	30708031	31000733	292702	70	0.000239151
KHDRBS3	Chr14	7440516	7582740	142224	34	0.00023906
PIP4K2A	Chr13	23900872	24085889	185017	44	0.000237816
KCNIP1	Chr20	2283782	2544513	260731	62	0.000237793
NTM	Chr29	35154171	35575690	421519	100	0.000237237
NRXN1	Chr11	32129670	33353206	1223536	289	0.000236201
HS6ST3	Chr12	77227237	77947529	720292	170	0.000236015
SUGCT	Chr4	80866408	81642062	775654	183	0.00023593
PPM1L	Chr1	107240576	107576169	335593	79	0.000235404
ZMYND8	Chr13	76501072	76616233	115161	27	0.000234454
TBC1D8	Chr11	6009121	6149923	140802	33	0.000234372
TMEM117	Chr5	36197270	36807308	610038	142	0.000232772
CTNNA2	Chr11	54722278	56082035	1359757	316	0.000232394
PPP1R12A	Chr5	9352197	9511533	159336	37	0.000232214
NXN	Chr19	22457711	22621494	163783	38	0.000232014
EVC2	Chr6	105291555	105451674	160119	37	0.000231078
LMBRD1	Chr9	8819654	8953828	134174	31	0.000231043
USP13	Chr1	87949653	88075267	125614	29	0.000230866
ITPR2	Chr5	83398940	83986145	587205	135	0.000229903
ANKH	Chr20	58376938	58546813	169875	39	0.000229581
CCSER1	Chr6	35100698	35938394	837696	192	0.0002292
PARVA	Chr15	40748737	40902329	153592	35	0.000227876
TG	Chr14	9262249	9508938	246689	56	0.000227006
RSPO2	Chr14	58537058	58709246	172188	39	0.000226497
LRRC1	Chr23	6529132	6666336	137204	31	0.000225941
SLC8A1	Chr11	22442323	22890405	448082	101	0.000225405
PEX5L	Chr1	87718518	87976183	257665	58	0.000225098
GNA14	Chr8	53686441	53949024	262583	59	0.000224691
LSAMP	Chr1	61026445	61780987	754542	169	0.000223977
FGF14	Chr12	82112585	82751285	638700	143	0.000223892
RBM19	Chr17	62886621	63007318	120697	27	0.000223701
PRKG1	Chr26	6905321	8343635	1438314	321	0.000223178
ARHGEF26	Chr1	114292212	114431455	139243	31	0.000222632
GPC5	Chr12	66292145	67325671	1033526	228	0.000220604
TEX2	Chr19	49006473	49133532	127059	28	0.00022037
ADAM23	Chr2	95145118	95340406	195288	43	0.000220188
SLX4IP	Chr13	3599085	3818864	219779	48	0.000218401
PPAPDC1A	Chr26	40883080	41029953	146873	32	0.000217875
SBF2	Chr15	42970966	43482359	511393	111	0.000217054
TNKS	Chr27	24632929	24789584	156655	34	0.000217037
NOL4	Chr24	23166233	23627792	461559	100	0.000216657
NOL4	Chr24	23166233	23627792	461559	100	0.000216657
GRM7	Chr22	18701583	19647970	946387	205	0.000216613
NRXN1	Chr11	32129670	33353206	1223536	265	0.000216585
OTUD7A	Chr21	30596445	30754025	157580	34	0.000215763
CNIH3	Chr16	28441399	28580589	139190	30	0.000215533
CWC27	Chr20	14421748	14681940	260192	56	0.000215226
HS3ST5	Chr9	36551273	36844170	292897	63	0.000215093
ABR	Chr19	22287404	22431565	144161	31	0.000215037
RAD51B	Chr10	80248848	80631540	382692	82	0.000214272
DENND5B	Chr5	78750280	78966082	215802	46	0.000213158
NRG3	Chr28	37100608	38351432	1250824	266	0.00021266
ERC2	Chr22	45094509	45555747	461238	98	0.000212472
DNAH7	Chr2	84773342	85028058	254716	54	0.000212001
CLPB	Chr15	52661472	52804186	142714	30	0.000210211
CPQ	Chr14	69287299	69893052	605753	127	0.000209656
PARK2	Chr9	98421509	99648791	1227282	257	0.000209406
ZNF438	Chr13	34524931	34807030	282099	59	0.000209146
DPYD	Chr3	45563731	46487165	923434	193	0.000209002
KCNIP4	Chr6	41707927	41837538	129611	27	0.000208316
SPTBN1	Chr11	37030008	37241384	211376	44	0.00020816
PACS1	Chr29	44818904	44948733	129829	27	0.000207966
GRB10	Chr4	5104898	5244384	139486	29	0.000207906
PLD1	Chr1	96517508	96676253	158745	33	0.000207881
WDFY4	Chr28	43426275	43657766	231491	48	0.000207351
CDH18	Chr20	53409875	54014026	604151	125	0.000206902
ABCA4	Chr3	49541294	49686388	145094	30	0.000206763
SLC4A4	Chr6	88235022	88540288	305266	63	0.000206377
WWTR1	Chr1	119437951	119583580	145629	30	0.000206003
CFTR	Chr4	51035770	51249563	213793	44	0.000205807
CCDC85A	Chr11	38706387	38930060	223673	46	0.000205657
LHFP	Chr12	22817677	23026883	209206	43	0.000205539
SLC25A21	Chr21	47309279	47831840	522561	107	0.000204761
METTL24	Chr9	40335193	40462569	127376	26	0.00020412
NRXN3	Chr10	91597566	92224180	626614	127	0.000202677
SORCS3	Chr26	25469309	26398291	928982	188	0.000202372
UBR5	Chr14	64169831	64308334	138503	28	0.000202162
PRKCA	Chr19	63283191	63581825	298634	60	0.000200915
PPAP2A	Chr20	23658801	23793337	134536	27	0.00020069
GNG2	Chr10	44711723	44842193	130470	26	0.00019928
PPP2R5E	Chr10	75953661	76109267	155606	31	0.000199221
PARP8	Chr20	28315520	28506629	191109	38	0.000198839
LAMA4	Chr9	38644190	38811230	167040	33	0.000197557
PLA2G4A	Chr16	69443237	69620712	177475	35	0.000197211
LRRTM3	Chr28	23510347	23719897	209550	41	0.000195657
FAF1	Chr3	95937278	96434762	497484	97	0.000194981
NRG3	Chr28	37100608	38351432	1250824	243	0.000194272
RALGPS2	Chr16	61559976	61719616	159640	31	0.000194187
MOB3B	Chr8	16745168	16961935	216767	42	0.000193756
BCL2	Chr24	61914151	62105526	191375	37	0.000193338
TCF7L2	Chr26	33756335	33942737	186402	36	0.000193131
LOC790886	Chr16	5517501	5876374	358873	69	0.000192269
ASIC2	Chr19	16353061	17563070	1210009	232	0.000191734
KCNN2	Chr10	3206566	3373648	167082	32	0.000191523
KCNN2	Chr10	3206566	3373648	167082	32	0.000191523
TPRG1	Chr1	78604072	78758431	154359	29	0.000187874
COMMD1	Chr11	60427664	60598439	170775	32	0.000187381
ATP8A1	Chr6	62893071	63128208	235137	44	0.000187125
LHFP	Chr12	22817677	23026883	209206	39	0.000186419
SPATA6	Chr3	98370382	98536867	166485	31	0.000186203
GRIK1	Chr1	5447784	5915577	467793	87	0.00018598
SCD5	Chr6	99233278	99410753	177475	33	0.000185942
LUZP2	Chr29	20257013	20804981	547968	101	0.000184317
ERC2	Chr22	45094509	45555747	461238	85	0.000184287
KCNIP1	Chr20	2283782	2544513	260731	48	0.000184098
SLC35F3	Chr28	6762321	7196921	434600	80	0.000184077
LRRC16A	Chr23	32029121	32339087	309966	57	0.000183891
FAM19A1	Chr22	33081564	33591957	510393	93	0.000182213
COL4A3	Chr2	116130999	116291205	160206	29	0.000181017
ZNF438	Chr13	34524931	34807030	282099	51	0.000180788
TSPAN18	Chr15	75693433	75843208	149775	27	0.00018027
DGKB	Chr4	22333432	23127587	794155	143	0.000180066
SNX29	Chr25	10743975	11273963	529988	95	0.000179249
MATN2	Chr14	68478178	68651684	173506	31	0.000178668
PLCL1	Chr2	86717861	87087608	369747	66	0.0001785
ANTXR2	Chr6	96346731	96526016	179285	32	0.000178487
MTA3	Chr11	25016564	25173984	157420	28	0.000177868
TMEM108	Chr1	137110870	137499189	388319	69	0.000177689
CPNE8	Chr5	42421553	42698413	276860	49	0.000176985
AP3B1	Chr10	9040250	9300567	260317	46	0.000176708
PLD1	Chr1	96517508	96676253	158745	28	0.000176384
FLT1	Chr12	31648192	31853085	204893	36	0.000175701
CDH12	Chr20	51282706	51624351	341645	60	0.000175621
ASH1L	Chr3	15176830	15353404	176574	31	0.000175564
MMP16	Chr14	76757694	77111545	353851	62	0.000175215
NDUFA10	Chr3	119633965	119794438	160473	28	0.000174484
NDUFA10	Chr3	119633965	119794438	160473	28	0.000174484
CDK14	Chr4	7844073	8440697	596624	104	0.000174314
LRRC16A	Chr23	32029121	32339087	309966	54	0.000174213
SPON1	Chr15	38991043	39309268	318225	55	0.000172834
WDFY4	Chr28	43426275	43657766	231491	40	0.000172793
FRMD6	Chr10	44342322	44615289	272967	47	0.000172182
AIG1	Chr9	81550368	81829533	279165	48	0.000171941
MICU1	Chr28	28562361	28777941	215580	37	0.00017163
GRIK3	Chr3	109422555	109667304	244749	42	0.000171604
ADGB	Chr9	85020550	85218729	198179	34	0.000171562
OPCML	Chr29	34991563	35575245	583682	100	0.000171326
TNS1	Chr2	106627005	106773154	146149	25	0.000171058
RALYL	Chr14	80029572	80865916	836344	143	0.000170982
CNTN5	Chr15	9446547	9985709	539162	92	0.000170635
FER	Chr7	110465381	110864228	398847	68	0.000170491
CA10	Chr19	626244	1473294	847050	144	0.000170002
LHFPL3	Chr4	45806017	46389155	583138	99	0.000169771
ZNF385B	Chr2	17084638	17449868	365230	62	0.000169756
FAM19A4	Chr22	32698748	32906212	207464	35	0.000168704
GMDS	Chr23	51115435	51453575	338140	57	0.000168569
EBF1	Chr7	72394109	72804182	410073	68	0.000165824
FAF1	Chr3	95937278	96434762	497484	82	0.000164829
PLCXD3	Chr20	33030482	33230696	200214	33	0.000164824
KLF12	Chr12	48831951	49184354	352403	58	0.000164584
BCAR3	Chr3	49850608	50069718	219110	36	0.000164301
PDZRN4	Chr5	39498214	39857738	359524	59	0.000164106
PRDM5	Chr6	4491174	4743136	251962	41	0.000162723
STIM1	Chr15	51845549	52049268	203719	33	0.000161988
LOC790886	Chr16	5517501	5876374	358873	58	0.000161617
NFKB1	Chr6	23557308	23886473	329165	53	0.000161013
SYT1	Chr5	8444601	9062868	618267	99	0.000160125
ZIM2	Chr18	63769539	64182957	413418	66	0.000159645
PRODH	Chr17	74054343	74456079	401736	64	0.000159309
PARK2	Chr9	98421509	99648791	1227282	195	0.000158888
OTUD7A	Chr21	30596445	30754025	157580	25	0.00015865
SEMA3A	Chr4	36560825	36807918	247093	39	0.000157835
SH3GL2	Chr8	26631847	26859970	228123	36	0.00015781
PHACTR1	Chr23	43053331	43649504	596173	94	0.000157672
PRKCA	Chr19	63283191	63581825	298634	47	0.000157383
FOXN3	Chr10	101891647	102300271	408624	64	0.000156623
CELF2	Chr13	13036995	13248003	211008	33	0.000156392
XRCC4	Chr7	85267806	85556934	289128	45	0.00015564
MIR2285M-3	Chr15	39683832	40276957	593125	92	0.000155111
DPYD	Chr3	45563731	46487165	923434	143	0.000154857
AP3B1	Chr10	9040250	9300567	260317	40	0.000153659
CLSTN2	Chr1	129389225	130108428	719203	110	0.000152947
AUH	Chr8	87946779	88123853	177074	27	0.000152479
PLXDC2	Chr13	21595580	22015325	419745	64	0.000152474
EXT1	Chr14	48318417	48634023	315606	48	0.000152088
DPP10	Chr2	67307817	68111289	803472	122	0.000151841
FSTL5	Chr17	37149471	38027600	878129	133	0.000151458
GRM3	Chr4	33769687	34021297	251610	38	0.000151027
CHD9	Chr18	21634591	21859834	225243	34	0.000150948
ZMAT4	Chr27	35241285	35618997	377712	57	0.000150909
SORBS1	Chr26	16687128	16919269	232141	35	0.00015077
ZNF385B	Chr2	17084638	17449868	365230	55	0.00015059
CHRM3	Chr28	12498191	12812574	314383	47	0.000149499
ASIC2	Chr19	16353061	17563070	1210009	178	0.000147106
RNF180	Chr20	15075200	15320360	245160	36	0.000146843
PLXNA2	Chr16	77046044	77250671	204627	30	0.000146608
EXT1	Chr14	48318417	48634023	315606	46	0.000145751
CERS6	Chr2	27407916	27758923	351007	51	0.000145296
ITFG1	Chr18	15625547	15928962	303415	44	0.000145016
ZEB1	Chr13	34061281	34261303	200022	29	0.000144984
KIAA0922	Chr17	3991589	4165391	173802	25	0.000143842
TLL1	Chr17	1491332	1819993	328661	47	0.000143004
FLT1	Chr12	31648192	31853085	204893	29	0.000141537
CNTN5	Chr15	9446547	9985709	539162	76	0.000140959
LDLRAD3	Chr15	67240026	67518041	278015	39	0.00014028
UNC13C	Chr10	55715816	56410341	694525	97	0.000139664
CDH10	Chr20	48874611	49060950	186339	26	0.000139531
CTNNA2	Chr11	54722278	56082035	1359757	189	0.000138995
PPM1H	Chr5	50861333	51163885	302552	42	0.000138819
FSTL5	Chr17	37149471	38027600	878129	121	0.000137793
ARHGAP26	Chr7	55695012	56167822	472810	65	0.000137476
IGF1R	Chr21	7967717	8268093	300376	41	0.000136496
PPP2R2B	Chr7	59782766	60099412	316646	43	0.000135798
SLC35F3	Chr28	6762321	7196921	434600	59	0.000135757
ME3	Chr29	8947351	9168579	221228	30	0.000135607
CDH23	Chr28	27729163	28123449	394286	53	0.00013442
TMTC1	Chr5	80191842	80498478	306636	41	0.000133709
NDST4	Chr6	11683809	11962933	279124	37	0.000132558
TMEM135	Chr29	8296929	8539161	242232	32	0.000132105
NOS1AP	Chr3	7121478	7463616	342138	45	0.000131526
SYT1	Chr5	8444601	9062868	618267	81	0.000131011
CHST11	Chr5	68385644	68645774	260130	34	0.000130704
UTRN	Chr9	82761887	83320493	558606	73	0.000130682
AKT3	Chr16	34132647	34404652	272005	35	0.000128674
MSI2	Chr19	8321185	8725348	404163	52	0.000128661
UNC13C	Chr10	55715816	56410341	694525	89	0.000128145
KCNH1	Chr16	74105859	74543184	437325	56	0.000128051
LRFN5	Chr21	51772759	52095084	322325	41	0.000127201
EXOC4	Chr4	97791620	98596239	804619	102	0.000126768
GSG1L	Chr25	25599907	25852495	252588	32	0.000126689
BBX	Chr1	52548840	52841455	292615	37	0.000126446
DIS3L2	Chr2	120486065	120794558	308493	39	0.000126421
CELF4	Chr24	19819064	20129088	310024	39	0.000125797
NOS1AP	Chr3	7121478	7463616	342138	43	0.00012568
NTNG1	Chr3	35969785	36337030	367245	46	0.000125257
ASAP1	Chr14	11327980	11696284	368304	46	0.000124897
NRXN3	Chr10	91597566	92224180	626614	78	0.000124479
GALNTL6	Chr8	3816703	5330615	1513912	188	0.000124182
CLSTN2	Chr1	129389225	130108428	719203	89	0.000123748
SNRPD3	Chr17	73479561	73804664	325103	40	0.000123038
KIAA1324L	Chr4	33518952	33763022	244070	30	0.000122916
CDK5R1	Chr19	17784333	18028444	244111	30	0.000122895
PLXDC2	Chr13	21595580	22015325	419745	51	0.000121502
PLCB1	Chr13	789367	1695916	906549	110	0.000121339
DENND5B	Chr5	78750280	78966082	215802	26	0.000120481
LOC509513	Chr4	106638734	106904802	266068	32	0.00012027
MEIS2	Chr10	32643641	32868269	224628	27	0.000120199
GALNTL6	Chr8	3816703	5330615	1513912	180	0.000118897
MIR450B	Chr9	8768150	9029556	261406	31	0.000118589
CTNNA3	Chr28	22418863	24299242	1880379	222	0.000118061
ME3	Chr29	8947351	9168579	221228	26	0.000117526
GRM8	Chr4	91470675	92316363	845688	99	0.000117064
SMYD3	Chr16	31589363	32333420	744057	87	0.000116927
KSR2	Chr17	59486326	59916270	429944	50	0.000116294
NRXN1	Chr11	32129670	33353206	1223536	142	0.000116057
NR3C2	Chr17	9742221	10173557	431336	50	0.000115919
NAV3	Chr5	7295153	7675749	380596	44	0.000115608
CTNNA2	Chr11	54722278	56082035	1359757	156	0.000114726
PLCB1	Chr13	789367	1695916	906549	104	0.000114721
HMCN1	Chr16	68192900	68733392	540492	62	0.00011471
NRG3	Chr28	37100608	38351432	1250824	143	0.000114325
CADM1	Chr15	26101328	26451530	350202	40	0.00011422
NLGN1	Chr1	93626046	94742072	1116026	127	0.000113797
PAG16	Chr29	38952099	39189606	237507	27	0.000113681
ADAM12	Chr26	45848825	46238138	389313	44	0.00011302
LRRC16A	Chr23	32029121	32339087	309966	35	0.000112916
SLC39A11	Chr19	58779398	59071795	292397	33	0.00011286
FER	Chr7	110465381	110864228	398847	45	0.000112825
LPHN3	Chr6	78734710	79313831	579121	65	0.000112239
RBFOX3	Chr19	53623086	53953039	329953	37	0.000112137
DNAH9	Chr19	30963454	31248933	285479	32	0.000112092
TFEC	Chr4	52589573	52812810	223237	25	0.000111989
DOCK10	Chr2	113649883	113891186	241303	27	0.000111893
NME7	Chr16	37593774	37838172	244398	27	0.000110476
XKR6	Chr8	7983847	8255452	271605	30	0.000110455
FOXN3	Chr10	101891647	102300271	408624	45	0.000110126
LUZP2	Chr29	20257013	20804981	547968	60	0.000109495
CACNA2D1	Chr4	38339042	38860701	521659	57	0.000109267
CDH23	Chr28	27729163	28123449	394286	43	0.000109058
NCAM1	Chr15	23807380	24165753	358373	39	0.000108825
SGCD	Chr7	69585065	70027839	442774	48	0.000108407
SLC4A4	Chr6	88235022	88540288	305266	33	0.000108102
FOXP2	Chr4	54087156	54392614	305458	33	0.000108034
CWC27	Chr20	14421748	14681940	260192	28	0.000107613
DLGAP1	Chr24	37994545	38293883	299338	32	0.000106903
GALNT18	Chr15	41624350	41980710	356360	38	0.000106634
MYCBP2	Chr12	52496958	52769208	272250	29	0.00010652
GMDS	Chr23	51115435	51453575	338140	36	0.000106465
MYO1D	Chr19	17665143	18023500	358357	38	0.00010604
FAM155A	Chr12	86811824	87425540	613716	65	0.000105912
USH2A	Chr16	19573855	20502175	928320	98	0.000105567
GULP1	Chr2	7830306	8068230	237924	25	0.000105076
WDPCP	Chr11	61655883	61970015	314132	33	0.000105051
GTDC1	Chr2	52552245	52897803	345558	36	0.000104179
PLCB1	Chr13	789367	1695916	906549	94	0.00010369
ZFAND3	Chr23	11712801	12040964	328163	34	0.000103607
DOCK10	Chr2	113649883	113891186	241303	25	0.000103604
SLC25A21	Chr21	47309279	47831840	522561	54	0.000103337
CCSER1	Chr6	35100698	35938394	837696	86	0.000102663
BCKDHB	Chr9	19963213	20335161	371948	38	0.000102165
SLC9A9	Chr1	126040088	126704343	664255	67	0.000100865
CUX2	Chr17	57065815	57343548	277733	28	0.000100816
TBC1D5	Chr1	155833977	156350787	516810	52	0.000100617
CFH	Chr16	5486704	6172566	685862	69	0.000100603
KCNIP1	Chr20	2283782	2544513	260731	26	9.97196e-05
KCNAB1	Chr1	112013081	112314022	300941	30	9.96873e-05
ODZ3	Chr27	12356854	12810551	453697	45	9.91851e-05
PHACTR1	Chr23	43053331	43649504	596173	59	9.89646e-05
KCNMA1	Chr28	32824639	33588126	763487	75	9.82335e-05
GALNT18	Chr15	41624350	41980710	356360	35	9.82153e-05
TANC2	Chr19	48089630	48406633	317003	31	9.77909e-05
LRRC7	Chr3	75355802	75744768	388966	38	9.76949e-05
NCAM1	Chr15	23807380	24165753	358373	35	9.76636e-05
RNF220	Chr3	101957670	102238778	281108	27	9.60485e-05
TRAPPC9	Chr14	4229511	4616552	387041	37	9.55971e-05
CACNA1D	Chr22	47721359	48066942	345583	33	9.54908e-05
KCND2	Chr4	85436726	86002870	566144	54	9.53821e-05
GRIA1	Chr7	66763267	67109662	346395	33	9.5267e-05
APP	Chr1	9607381	9921005	313624	29	9.24674e-05
PHACTR1	Chr23	43053331	43649504	596173	55	9.22551e-05
LARGE	Chr5	72156270	72614194	457924	42	9.17183e-05
GRIK2	Chr9	48474664	49218775	744111	68	9.13842e-05
ROBO1	Chr1	25619014	26210307	591293	54	9.13253e-05
TMTC1	Chr5	80191842	80498478	306636	28	9.13135e-05
CERS6	Chr2	27407916	27758923	351007	32	9.11663e-05
KIRREL3	Chr29	30128059	30886851	758792	69	9.0934e-05
SHROOM3	Chr6	93066720	93399009	332289	30	9.02829e-05
FER	Chr7	110465381	110864228	398847	36	9.02602e-05
TMEFF2	Chr2	80997732	81275827	278095	25	8.98973e-05
IGF1R	Chr21	7967717	8268093	300376	27	8.98873e-05
GALNT18	Chr15	41624350	41980710	356360	32	8.97968e-05
OPCML	Chr29	34991563	35575245	583682	52	8.90896e-05
FSTL5	Chr17	37149471	38027600	878129	78	8.88252e-05
OPCML	Chr29	34554006	35085490	531484	47	8.84316e-05
CAMKMT	Chr11	26602907	27032984	430077	38	8.83563e-05
KIRREL3	Chr29	30128059	30886851	758792	67	8.82982e-05
C8H9orf3	Chr8	82590160	83012155	421995	37	8.76788e-05
HS6ST3	Chr12	77227237	77947529	720292	62	8.60762e-05
CPQ	Chr14	69287299	69893052	605753	52	8.58436e-05
SGCD	Chr7	69585065	70027839	442774	38	8.58226e-05
CADM1	Chr15	26101328	26451530	350202	30	8.56648e-05
PHACTR1	Chr23	43053331	43649504	596173	51	8.55456e-05
MAPK10	Chr6	102687304	103063477	376173	32	8.50672e-05
ZNF385B	Chr2	17084638	17449868	365230	31	8.4878e-05
HS6ST3	Chr12	77227237	77947529	720292	61	8.46879e-05
KCNH5	Chr10	75235433	75637242	401809	34	8.46173e-05
CFH	Chr16	5486704	6172566	685862	58	8.45651e-05
KLHL29	Chr11	75290643	75623195	332552	28	8.41974e-05
ASAP1	Chr14	11327980	11696284	368304	31	8.41696e-05
PLD5	Chr16	35207144	35635140	427996	36	8.41129e-05
PPP2R2B	Chr7	59782766	60294948	512182	43	8.39545e-05
LUZP2	Chr29	20257013	20804981	547968	46	8.39465e-05
MYO1D	Chr19	17665143	18023500	358357	30	8.37154e-05
SGCD	Chr7	69585065	70027839	442774	37	8.35641e-05
EPHB1	Chr1	135191077	135658387	467310	39	8.34564e-05
PPM1L	Chr1	107240576	107576169	335593	28	8.34344e-05
PLXDC2	Chr13	21595580	22015325	419745	35	8.3384e-05
KIRREL3	Chr29	30128059	30886851	758792	63	8.30267e-05
SORCS3	Chr26	25469309	26398291	928982	76	8.181e-05
SLCO3A1	Chr21	15205585	15584700	379115	31	8.17694e-05
PLCE1	Chr26	15371779	15702253	330474	27	8.17008e-05
OPCML	Chr29	34554006	35085490	531484	43	8.09055e-05
CTNNA2	Chr11	54722278	56082035	1359757	110	8.08968e-05
PCDH7	Chr6	51536862	52009280	472418	38	8.04372e-05
PDE4B	Chr3	79284898	79734387	449489	36	8.00909e-05
KLHL1	Chr12	44295887	44823477	527590	42	7.96073e-05
CAMKMT	Chr11	26602907	27032984	430077	34	7.90556e-05
CDK14	Chr4	7844073	8440697	596624	47	7.87766e-05
RAPGEF4	Chr2	23644875	23974945	330070	26	7.87712e-05
GUCY1A2	Chr15	16604380	17100655	496275	39	7.85855e-05
NTRK3	Chr21	19222945	19643577	420632	33	7.84534e-05
ASCC3	Chr9	49714501	50103401	388900	30	7.71407e-05
FGF14	Chr12	82112585	82751285	638700	49	7.67183e-05
NSG1	Chr6	106482070	107356641	874571	67	7.6609e-05
GRIN2B	Chr5	96408803	96761516	352713	27	7.65495e-05
CCSER1	Chr6	35100698	35938394	837696	64	7.64e-05
CCSER1	Chr6	35100698	35938394	837696	64	7.64e-05
GALNT18	Chr15	41624350	41980710	356360	27	7.57661e-05
MSRA	Chr8	8635549	9019576	384027	29	7.55155e-05
PRKCB	Chr25	21759691	22131513	371822	28	7.53049e-05
TRAPPC9	Chr14	4229511	4616552	387041	29	7.49275e-05
CADPS2	Chr4	87522148	88100974	578826	43	7.42883e-05
KALRN	Chr1	69105207	69724961	619754	46	7.4223e-05
FRMD5	Chr21	56048402	56400900	352498	26	7.37593e-05
OPCML	Chr29	34991563	35575245	583682	43	7.36703e-05
SNX29	Chr25	10743975	11273963	529988	39	7.35866e-05
NRG3	Chr28	37100608	38351432	1250824	92	7.35515e-05
APBB2	Chr6	61362543	61744231	381688	28	7.33583e-05
USH2A	Chr16	19573855	20502175	928320	68	7.32506e-05
GRIK4	Chr15	31801642	32143949	342307	25	7.30339e-05
FHOD3	Chr24	20649325	21172169	522844	38	7.26794e-05
HMCN1	Chr16	68192900	68733392	540492	39	7.21565e-05
SNX29	Chr25	10743975	11273963	529988	38	7.16997e-05
WDR7	Chr24	56467339	56817504	350165	25	7.13949e-05
ZNF385B	Chr2	17084638	17449868	365230	26	7.1188e-05
FOXN3	Chr10	101891647	102300271	408624	29	7.09699e-05
BBS9	Chr4	63649807	64105542	455735	32	7.02162e-05
SORCS3	Chr26	25469309	26398291	928982	65	6.99691e-05
DENND1A	Chr11	94526959	95055931	528972	37	6.9947e-05
NAV3	Chr5	7295153	7675749	380596	26	6.83139e-05
ASAP1	Chr14	11327980	11696284	368304	25	6.78787e-05
ADK	Chr28	30215524	30732465	516941	35	6.7706e-05
NSG1	Chr6	106482070	107356641	874571	59	6.74616e-05
KCNH5	Chr10	75235433	75637242	401809	27	6.71961e-05
SUFU	Chr26	22980783	23517374	536591	36	6.70902e-05
RALYL	Chr14	80029572	80865916	836344	56	6.69581e-05
KCNB2	Chr14	37990750	38454479	463729	31	6.68494e-05
LRRC7	Chr3	75355802	75744768	388966	26	6.68439e-05
DPP6	Chr4	116891030	117804092	913062	61	6.68082e-05
CDKAL1	Chr23	36601289	37218380	617091	41	6.64408e-05
TCF12	Chr10	53089212	53481049	391837	26	6.63541e-05
GRM7	Chr22	18701583	19647970	946387	62	6.55123e-05
DGKB	Chr4	22333432	23127587	794155	52	6.54784e-05
FAM155A	Chr12	86811824	87425540	613716	40	6.51767e-05
CDK14	Chr4	7844073	8440697	596624	38	6.36917e-05
SND1	Chr4	92679168	93108508	429340	27	6.28872e-05
ANKS1B	Chr5	63229075	63658499	429424	27	6.28749e-05
PRKG1	Chr26	6905321	8343635	1438314	90	6.25733e-05
BTBD9	Chr23	12046516	12462083	415567	26	6.25651e-05
RBFOX1	Chr25	5417263	6686802	1269539	79	6.22273e-05
NKAIN2	Chr9	26688273	27348055	659782	41	6.21417e-05
ADK	Chr28	30215524	30732465	516941	32	6.19026e-05
KCNH1	Chr16	74105859	74543184	437325	27	6.1739e-05
CDH13	Chr18	9189534	10164197	974663	60	6.15597e-05
[truncated: 114 more rows]

## Sheet: TWICE_SEQ_INV
GeneID	Chr	Start	End	Gene Length	Overlap Length with SV	Gene % overlapped with SV
PRKG2	Chr6	97768555	97769016	461	461	1
2005-03-01	Chr26	13814468	13814828	360	360	1
CST6	Chr29	44770985	44771529	544	536	0.985294
PRAME	Chr17	51374857	51380364	5507	2185	0.396768
MTSS1	Chr14	16971032	17132800	161768	11554	0.0714233
REPS1	Chr9	77666177	77757440	91263	4995	0.0547319
PLSCR5	Chr1	122815604	122842538	26934	1178	0.0437365
DAP	Chr20	62630505	62697438	66933	2823	0.0421765
GSTO1	Chr26	25088447	25097722	9275	330	0.0355795
RPP14	Chr22	43553715	43561145	7430	164	0.0220727
APOBEC3A	Chr5	110936921	111048655	111734	2033	0.018195
ZNF444	Chr18	63736357	64015516	279159	5072	0.0181689
ASIC2	Chr19	16353061	17563070	1210009	15519	0.0128255
NTRK3	Chr21	19222945	19643577	420632	5367	0.0127594
ATP2B4	Chr16	1249731	1313257	63526	790	0.0124359
ZIM2	Chr18	63769539	64182957	413418	5072	0.0122685
PTPRR	Chr5	42837596	43112732	275136	3078	0.0111872
VIT	Chr11	19179547	19302492	122945	1281	0.0104193
FGF7	Chr10	61005652	61068184	62532	585	0.00935521
RAF1	Chr22	57122370	57204952	82582	598	0.00724129
TRIM37	Chr19	10165551	10317934	152383	948	0.00622117
WDR86	Chr4	114730381	114755250	24869	130	0.00522739
ZZZ3	Chr3	67231236	67349981	118745	514	0.0043286
KBTBD12	Chr22	60249056	60288275	39219	166	0.00423264
TDP1	Chr10	102697562	102766261	68699	267	0.00388652
SPON1	Chr15	38991043	39309268	318225	1010	0.00317385
CNTN1	Chr5	39998371	40264645	266274	838	0.00314713
CTNNA3	Chr28	22418863	24299242	1880379	5534	0.00294302
ADAM9	Chr27	33804291	33897036	92745	262	0.00282495
SAMD4A	Chr10	67295512	67520622	225110	525	0.00233219
PLCB1	Chr13	789367	1695916	906549	1173	0.00129392
HS3ST5	Chr9	36551273	36844170	292897	261	0.000891098
CALN1	Chr25	28894400	29349033	454633	331	0.00072806
PRKG1	Chr26	6905321	8343635	1438314	891	0.000619475
SHROOM3	Chr6	93066720	93399009	332289	196	0.000589848
TDRD7	Chr8	63071038	63173716	102678	58	0.000564873
ARHGEF12	Chr15	31451179	31618417	167238	70	0.000418565
JAKMIP2	Chr7	60809070	60998968	189898	40	0.000210639
DENND1A	Chr11	94526959	95055931	528972	85	0.000160689
NEGR1	Chr3	73111653	74147063	1035410	104	0.000100443

## Sheet: TWICE_SEQ_DUP
GeneID	Chr	Start	End	Gene Length	Overlap Length with SV	Gene % overlapped with SV
PLA2G2A	Chr2	133289294	133295334	6040	6040	1
LOC100125947	Chr2	133289294	133295332	6038	6038	1
IFI27	Chr21	59330562	59336763	6201	2689	0.43364
HMG20B	Chr7	21574483	21577258	2775	519	0.187027
PROKR1	Chr11	66986759	66998537	11778	1209	0.102649
PEBP4	Chr8	70525318	70751235	225917	8815	0.0390188
ULBP21	Chr9	88273908	88299080	25172	665	0.0264182
PADI1	Chr2	135922928	135967599	44671	720	0.0161178
NHEDC1	Chr6	23187623	23229528	41905	628	0.0149863
ASIC2	Chr19	16353061	17563070	1210009	13428	0.0110974
COPG2	Chr4	95079913	95209257	129344	1193	0.00922347
RNPEP	Chr16	70815228	70824126	8898	81	0.00910317
WDR25	Chr21	66917779	67066001	148222	1317	0.00888532
FHOD1	Chr18	34977243	34993391	16148	139	0.00860788
LOC100125776	Chr15	46663447	46674104	10657	74	0.00694379
TRIM34	Chr15	48531193	48545433	14240	94	0.00660112
CALN1	Chr25	28894400	29349033	454633	2973	0.00653934
SYN1	ChrX	91191331	91437203	245872	1521	0.00618615
CACNA1A	Chr7	13249277	13506235	256958	1547	0.00602044
CLCA4	Chr3	57643203	57674223	31020	181	0.00583495
MMP20	Chr15	6278370	6336541	58171	307	0.00527754
COPG2	Chr4	95079913	95209257	129344	682	0.00527276
IQCC	Chr2	122146964	122409055	262091	1258	0.00479986
PLCB1	Chr13	789367	1695916	906549	4067	0.00448624
UNC13C	Chr10	55715816	56410341	694525	2871	0.00413376
ULBP17	Chr9	88231932	88402262	170330	665	0.00390419
RAET1G	Chr9	88231932	88402262	170330	665	0.00390419
FZD3	Chr8	10002971	10091175	88204	337	0.00382069
SPINK4	Chr8	76329356	76348122	18766	71	0.00378344
XKR6	Chr8	7983847	8255452	271605	944	0.00347564
PPP2R2B	Chr7	59782766	60099412	316646	1099	0.00347075
CNTN5	Chr15	9446547	9985709	539162	1767	0.00327731
YTHDC2	Chr10	2361695	2434171	72476	176	0.00242839
PPP2R2B	Chr7	59782766	60294948	512182	1099	0.00214572
ADAM23	Chr2	95145118	95340406	195288	367	0.00187928
PPP2R2B	Chr7	59782766	60099412	316646	575	0.00181591
KALRN	Chr1	69105207	69724961	619754	960	0.001549
INO80	Chr10	36618284	36742002	123718	173	0.00139834
NOS1AP	Chr3	7121478	7463616	342138	465	0.0013591
TPK1	Chr4	108539464	108922091	382627	492	0.00128585
EPHX4	Chr3	51494275	51531276	37001	46	0.00124321
PPP2R2B	Chr7	59782766	60294948	512182	575	0.00112265
MAP3K5	Chr9	75549282	75778418	229136	248	0.00108233
DLGAP1	Chr24	37994545	38293883	299338	308	0.00102894
ZMAT4	Chr27	35241285	35618997	377712	303	0.000802199
RBFOX1	Chr25	5417263	6686802	1269539	906	0.000713645
KIRREL3	Chr29	30128059	30886851	758792	431	0.000568008
RASSF4	Chr28	44940861	45014243	73382	38	0.000517838
ADAM10	Chr10	51598072	51739157	141085	64	0.000453627
THEMIS	Chr9	66683788	66885925	202137	76	0.000375983
CASC4	Chr10	103802802	103891475	88673	26	0.000293212
GAB1	Chr17	14625985	14753591	127606	34	0.000266445
KIRREL3	Chr29	30128059	30886851	758792	159	0.000209544
PRKCA	Chr19	63283191	63581825	298634	41	0.000137292
HS6ST2	ChrX	16394566	16783897	389331	52	0.000133562
KIRREL3	Chr29	30128059	30886851	758792	101	0.000133106
KIRREL3	Chr29	30128059	30886851	758792	63	8.30267e-05
KIRREL3	Chr29	30128059	30886851	758792	54	7.11657e-05

## Sheet: TWICE_SEQ_INS
GeneID	Chr	Start	End	Gene Length	Overlap Length with SV	Gene % overlapped with SV
ARMC7	Chr19	56957743	56972759	15016	46	0.0030634
RASSF2	Chr13	47492958	47515677	22719	53	0.00233285
MIER3	Chr20	22297316	22327176	29860	57	0.00190891
PSEN2	Chr16	30596048	30622407	26359	42	0.00159338
EIF2AK1	Chr25	38584312	38611209	26897	41	0.00152433
THAP4	Chr3	121118651	121153702	35051	48	0.00136943
PTPLB	Chr1	68464485	68550787	86302	112	0.00129777
TUBGCP5	Chr2	1162440	1212931	50491	38	0.000752609
CDK5RAP1	Chr13	63368940	63403771	34831	26	0.000746461
DTX1	Chr17	63358617	63396164	37547	28	0.000745732
SYBU	Chr14	56953458	56997971	44513	25	0.000561634
PRRC1	Chr7	27684800	27733587	48787	27	0.000553426
SCARB1	Chr17	53180928	53273732	92804	49	0.000527994
ADRBK2	Chr17	67642643	67759046	116403	50	0.000429542
RB1	Chr12	18196464	18316589	120125	49	0.000407908
FAM19A5	Chr5	119524716	119591231	66515	27	0.000405923
LRRC1	Chr23	6529132	6666336	137204	49	0.000357132
C25H16orf45	Chr25	13973578	14118510	144932	47	0.00032429
TSNARE1	Chr14	3054762	3171547	116785	35	0.000299696
GSG1L	Chr25	25599907	25852495	252588	70	0.000277131
C25H16orf45	Chr25	13973578	14118510	144932	40	0.000275991
MET	Chr4	51912650	52042198	129548	29	0.000223855
FRMD4A	Chr13	28631454	28961637	330183	68	0.000205946
PLCL2	Chr1	155618262	155833445	215183	32	0.000148711
FARS2	Chr23	48974669	49282524	307855	42	0.000136428
ASAP1	Chr14	11327980	11696284	368304	33	8.95999e-05
ASAP1	Chr14	11327980	11696284	368304	28	7.60242e-05
CA10	Chr19	626244	1473294	847050	63	7.43758e-05
KIRREL3	Chr29	30128059	30886851	758792	46	6.06227e-05
KIRREL3	Chr29	30128059	30886851	758792	45	5.93048e-05
KIRREL3	Chr29	30128059	30886851	758792	45	5.93048e-05
SYT1	Chr5	8444601	9062868	618267	29	4.69053e-05
WWOX	Chr18	5283871	6197660	913789	42	4.59625e-05
ASIC2	Chr19	16353061	17563070	1210009	53	4.38013e-05
PRKG1	Chr26	6905321	8343635	1438314	52	3.61534e-05
KIRREL3	Chr29	30128059	30886851	758792	27	3.55829e-05
PLCB1	Chr13	789367	1695916	906549	27	2.97833e-05
